# Supplementary material for: Transition-metal-free multinitrogenation of amides by C–C bond cleavage: a new approach to tetrazoles
Source: Royal Society of Chemistry journal article supplement (doi:10.1039/c8cc06324a), 2018-01-01
Supplement: c8cc06324a1.pdf [file c8cc06324a1.pdf]

## Transition-Metal-Free Multinitrogenation of Amides by C-C Bond

### Cleavage: A New Approach to Tetrazoles

Lian-Hua Li, Zhi-Jie Niu, Ying-Xiu Li, Yong-Min Liang\*

*State Key Laboratory of Applied Organic Chemistry, College of Chemistry and Chemical Engineering, Lanzhou University,  
Lanzhou, 730000, People's Republic of China  
Fax: +86-931-8912582; e-mail: [liangym@lzu.edu.cn](mailto:liangym@lzu.edu.cn)*

### Table of Contents

|          |                                                                |                |
|----------|----------------------------------------------------------------|----------------|
| <b>1</b> | <b>General information</b>                                     | <b>S2</b>      |
| <b>2</b> | <b>Optimization of the reaction conditions</b>                 | <b>S3-4</b>    |
| <b>3</b> | <b>General procedure for the synthesis of desired 1,5-DSTs</b> | <b>S5</b>      |
| <b>4</b> | <b>The monitoring experiment and NMR spectra</b>               | <b>S6-15</b>   |
| <b>5</b> | <b>X-ray structures of Tetrazoles: 3aa, 3ta, 3ua, 3Ra, 7aa</b> | <b>S16-20</b>  |
| <b>6</b> | <b>Characterization of compounds</b>                           | <b>S21-40</b>  |
| <b>7</b> | <b>Copies of NMR Spectra</b>                                   | <b>S41-108</b> |
| <b>8</b> | <b>References</b>                                              | <b>S109</b>    |

## General information

Column chromatography was carried out on silica gel. **<sup>1</sup>H NMR** spectra were recorded on 400 MHz in CDCl<sub>3</sub>. **<sup>13</sup>C NMR** spectra were recorded on 100 MHz in CDCl<sub>3</sub>. Chemical shifts (ppm) were recorded with tetramethylsilane (TMS) as the internal reference standard. Multiplicities are given as s (singlet), d (doublet), t (triplet), dd (doublet of doublets), q (quartet), or m (multiplet). Their **<sup>1</sup>H NMR** and **<sup>13</sup>C NMR** spectra are provided in the Supporting Information. The **HRMS** was obtained using a Q-TOF instrument equipped with **ESI** source. Data collections for crystal structure were performed at room temperature (293 K) using Mo K $\alpha$  radiation on a Bruker APEXII diffractometer. Melting points were measured with micro melting point apparatus.

The substituted amides were prepared according to the literature.<sup>[1]</sup> Trifluoromethanesulfonic anhydride (Tf<sub>2</sub>O) was commercially available. Solvents were dried using standard methods. All commercially available reagents were used with further purification. Dichloromethane (DCM) was distilled over phosphorous pentoxide.

## Optimization of the reaction conditions

**Table S1.** Additional optimization of the reaction.<sup>[a]</sup>

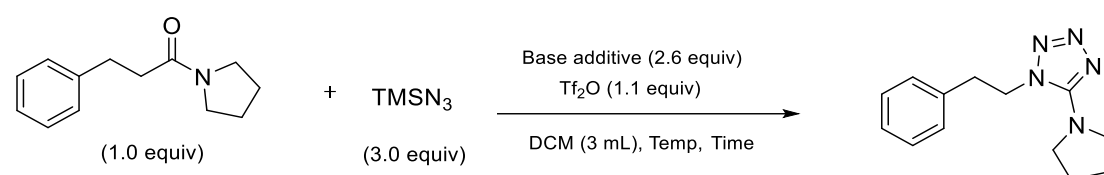

| Entry     | Base additive                              | Temp(°C)                    | Time(h)   | Solvent           | Yield(%) <sup>[e]</sup> |
|-----------|--------------------------------------------|-----------------------------|-----------|-------------------|-------------------------|
| 1         | 2,6-lutidine <sup>[b]</sup>                | -78-80                      | 14        | DCM               | trace                   |
| 2         | 2,6-dichloropyridine                       | -78-80                      | 14        | DCM               | trace                   |
| 3         | 2-methylpyridine                           | -78-80                      | 14        | DCM               | trace                   |
| 4         | 2-chloropyridine                           | -78-80                      | 14        | DCM               | trace                   |
| 5         | 2-bromopyridine                            | -78-80                      | 14        | DCM               | trace                   |
| 6         | 2-iodopyridine                             | -78-80                      | 14        | DCM               | trace                   |
| 7         | NaH                                        | -78-80                      | 14        | DCM               | 41                      |
| 8         | $\text{Na}_2\text{CO}_3$                   | -78-80                      | 14        | DCM               | 50                      |
| 9         | $\text{K}_2\text{CO}_3$                    | -78-80                      | 14        | DCM               | 28                      |
| 10        | NaOAc                                      | -78-80                      | 14        | DCM               | 46                      |
| 11        | $\text{NaHCO}_3$                           | -78-80                      | 14        | DCM               | 35                      |
| 12        | $\text{Na}_2\text{CO}_3$                   | -78-90                      | 14        | DCM               | 67                      |
| 13        | $\text{Na}_2\text{CO}_3$                   | -78-100                     | 14        | DCM               | 63                      |
| 14        | $\text{Na}_2\text{CO}_3$                   | -78-90                      | 20        | DCM               | 70                      |
| 15        | $\text{Na}_2\text{CO}_3$                   | -78-90                      | 20        | DCE               | 47                      |
| 16        | $\text{Na}_2\text{CO}_3$                   | -78-90                      | 20        | 1,2-dibromoethane | 60                      |
| 17        | $\text{Na}_2\text{CO}_3$                   | -78-90                      | 20        | toluene           | trace                   |
| 18        | $\text{Na}_2\text{CO}_3$                   | -78-90                      | 20        | DMA               | N,D                     |
| 19        | $\text{Na}_2\text{CO}_3$                   | -78-90                      | 20        | DMF               | N,D                     |
| 20        | $\text{Na}_2\text{CO}_3$                   | -78-90                      | 20        | 1,4-dioxane       | N,D                     |
| 21        | $\text{Na}_2\text{CO}_3$                   | 0-90 <sup>[c]</sup>         | 20        | DCM               | N,D                     |
| <b>22</b> | <b><math>\text{Na}_2\text{CO}_3</math></b> | <b>-40-90<sup>[d]</sup></b> | <b>20</b> | <b>DCM</b>        | <b>70</b>               |

[a] Reaction conditions: To a mixture of amide **1a** (0.2 mmol, 1.0 equiv),  $\text{TMSN}_3$  (3.0 equiv) and base additive (2.6 equiv) in DCM (3.0 mL) was added  $\text{Tf}_2\text{O}$  (1.1 equiv) at -78 °C under Ar atmosphere. After 20 min, the reaction mixture was stirred at reported temperature. [b] Base (2.0 equiv) was used. [c]  $\text{Tf}_2\text{O}$  was added at 0 °C. [d]  $\text{Tf}_2\text{O}$  was added at -40 °C. [e] Isolated yields. DCM=dichloromethane, DCE=1,2-dichloroethane, Tf=trifluoromethanesulfonyl, TMS=trimethylsilyl, DMA=dimethylacetamide, DMF=dimethyl formamide.

**Table S2.** Screening the ratio of the reagents of the reaction.<sup>[a]</sup>

| Entry | TMSN <sub>3</sub><br>(X equiv) | Na <sub>2</sub> CO <sub>3</sub><br>(Y equiv) | Tf <sub>2</sub> O<br>(Z equiv) | Yield <sup>[b]</sup><br>(%) |
|-------|--------------------------------|----------------------------------------------|--------------------------------|-----------------------------|
| 1     | 3                              | 2.6                                          | 0.9                            | 52                          |
| 2     | 3                              | 2.6                                          | 1.1                            | 70                          |
| 3     | 3                              | 2.6                                          | 1.3                            | 64                          |
| 4     | 3                              | 2.6                                          | 1.5                            | 54                          |
| 5     | 3                              | 2.6                                          | 1.7                            | 47                          |
| 6     | 3                              | 2.0                                          | 1.1                            | 50                          |
| 7     | 3                              | 2.4                                          | 1.1                            | 49                          |
| 8     | 3                              | 2.8                                          | 1.1                            | 73                          |
| 9     | 3                              | 3.2                                          | 1.1                            | 39                          |
| 10    | 4                              | 2.8                                          | 1.1                            | 81                          |
| 11    | 5                              | 2.8                                          | 1.1                            | 75                          |
| 12    | 2                              | 2.8                                          | 1.1                            | 33                          |

[a] Reaction conditions: To a mixture of amide **1a** (0.2 mmol, 1.0 equiv), TMSN<sub>3</sub> (X equiv) and base additive (Y equiv) in DCM (3.0 mL) was added Tf<sub>2</sub>O (Z equiv) at -40 °C under Ar atmosphere. After 20 min, the reaction mixture was stirred at 90 °C for 20 h. [b] Isolated yields.

**Table S3.** Screening the azides of the reaction.<sup>[a]</sup>

| entry | azide                    | yield(%) <sup>[b]</sup> |
|-------|--------------------------|-------------------------|
| 1     | TMSN <sub>3</sub>        | 81                      |
| 2     | NaN <sub>3</sub>         | 33                      |
| 3     | TsN <sub>3</sub>         | N,D                     |
| 4     | (Azidomethyl)benzene     | N,D                     |
| 5     | Diphenyl phosphorazidate | N,D                     |
| 6     | 1-azidopentane           | N,D                     |
| 7     | ethyl 2-azidoacetate     | N,D                     |

[a] Reaction conditions: To a mixture of amide (0.2 mmol, 1.0 equiv), azide (4.0 equiv) and base additive (2.8 equiv) in DCM (3.0 mL) was added Tf<sub>2</sub>O (1.1 equiv) at -40 °C under Ar atmosphere. After 20 min, the reaction mixture was stirred at 90 °C for 20 h. [b] Isolated yields.

## General procedure for the synthesis of desired 1,5-DSTs

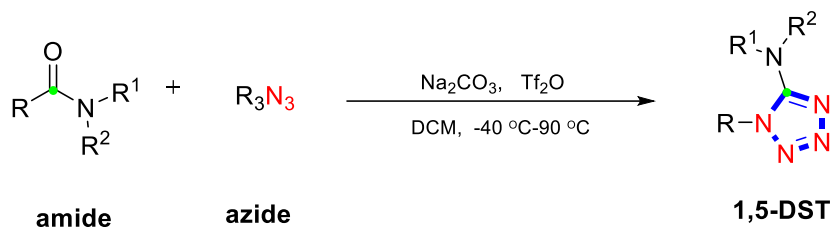

The amide (0.2 mmol, 1.0 equiv),  $\text{Na}_2\text{CO}_3$  (0.56 mmol) were added to a dried round bottom flask and put under Ar atmosphere. The azide (0.8 mmol),  $\text{DCM}$  (2.0 mL) were added and the solution was cooled to  $-40\text{ }^\circ\text{C}$ , followed by addition of  $\text{DCM}$  (1.0 mL) solution of  $\text{Tf}_2\text{O}$  (0.22 mmol) via syringe. After 20 minutes, the reaction mixture was heated to  $90\text{ }^\circ\text{C}$ . After 20 hours, the mixture was quenched by the saturated  $\text{NaHCO}_3$  solution and transferred to a separation funnel, diluted with  $\text{DCM}$  (15.0 mL) and the organic layer was washed with water (5.0 mL $\times$ 2) and brine (5.0 mL), dried over anhydrous  $\text{Na}_2\text{SO}_4$ , concentrated in vacuum and subjected to column chromatography.

## The monitoring experiment and NMR spectra

### Transformation of **3wa** monitored by $^{13}\text{C}$ NMR spectroscopy

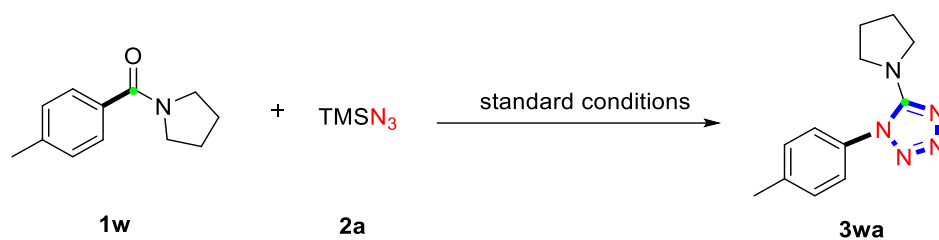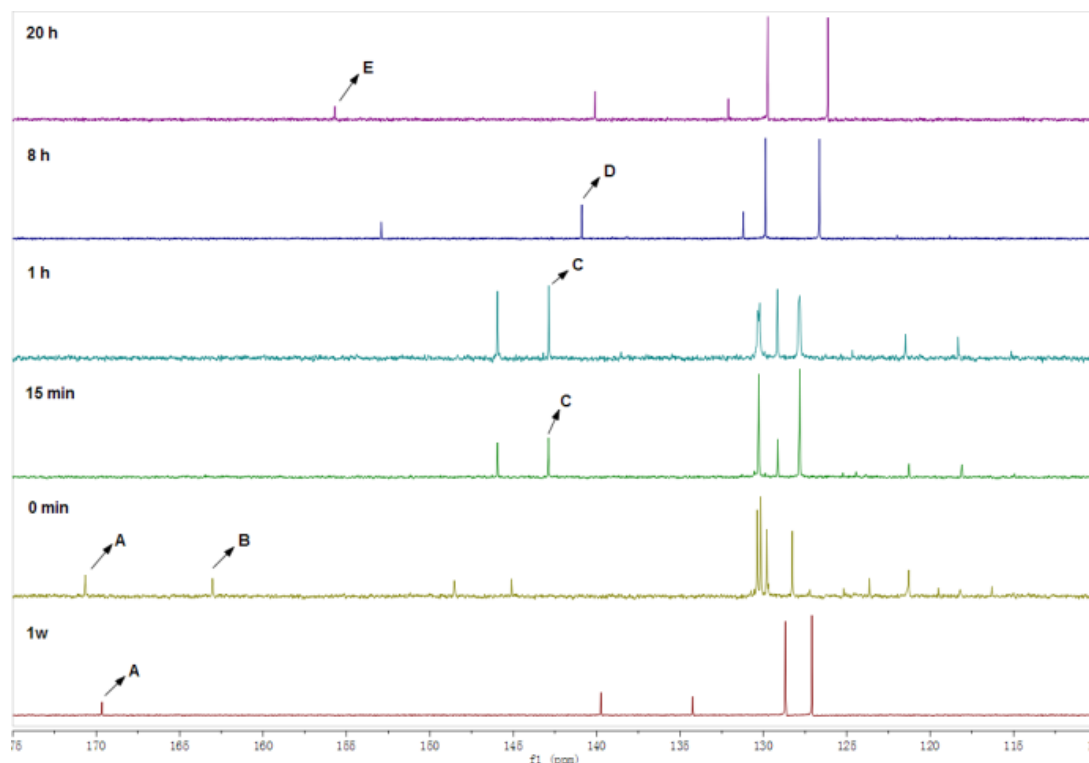

Transformation of **3wa** monitored by  $^{13}\text{C}$  NMR spectroscopy (100 MHz,  $\text{CDCl}_3$ ). A = **1w** carbonyl carbon, B, C and D = transforming signals assigned to original **1w** carbonyl carbon, E = **3wa** imine carbon.

The first  $^{13}\text{C}$  NMR (100 MHz,  $\text{CDCl}_3$ ) was standard spectrum of substrate **1w**.

Four sets of the amide **1w** (0.2 mmol, 1.0 equiv),  $\text{Na}_2\text{CO}_3$  (0.56 mmol) were added to four dried round bottom flasks and put under Ar atmosphere, respectively. The  $\text{TMSN}_3$  (0.8 mmol), DCM (2.0 mL) were each added to four flasks and the solutions were cooled to  $-40^\circ\text{C}$ , followed by addition of DCM (1.0 mL) solution of  $\text{Tf}_2\text{O}$  (0.22 mmol) via syringe, respectively. All of four reactions kept under  $-40^\circ\text{C}$  for 20 minutes. Then, the first reaction was stopped without heating and concentrated in vacuum. The mixture was added to NMR tube and the second  $^{13}\text{C}$  NMR was acquired. The second reaction was heated at  $90^\circ\text{C}$  for 15 minutes and stopped and concentrated in vacuum. The mixture was added to NMR tube and the third  $^{13}\text{C}$  NMR was acquired. The third reaction was heated for 1 hour and stopped and concentrated in vacuum. The mixture was added to NMR tube and the fourth  $^{13}\text{C}$  NMR was acquired. The fourth reaction was heated for 8

hours and stopped and concentrated in vacuum. The mixture was added to NMR tube and the fifth  $^{13}\text{C}$  NMR was acquired.

The sixth  $^{13}\text{C}$  NMR was standard spectrum of product **3wa**.

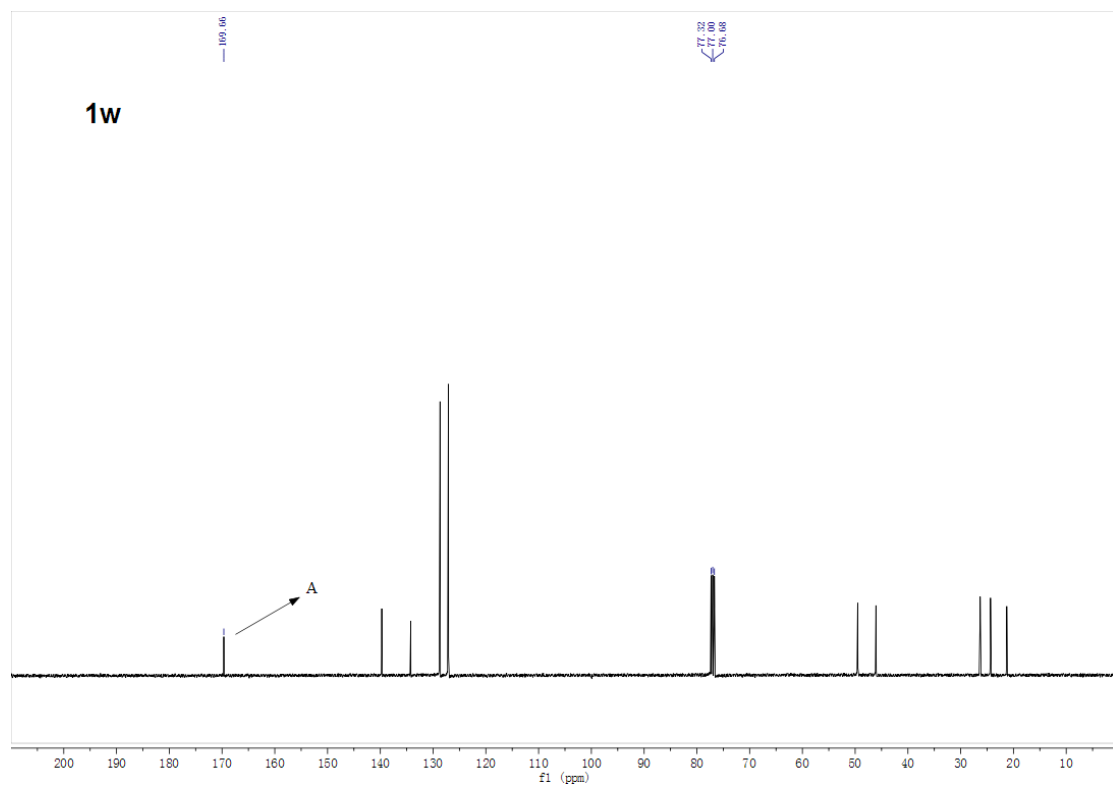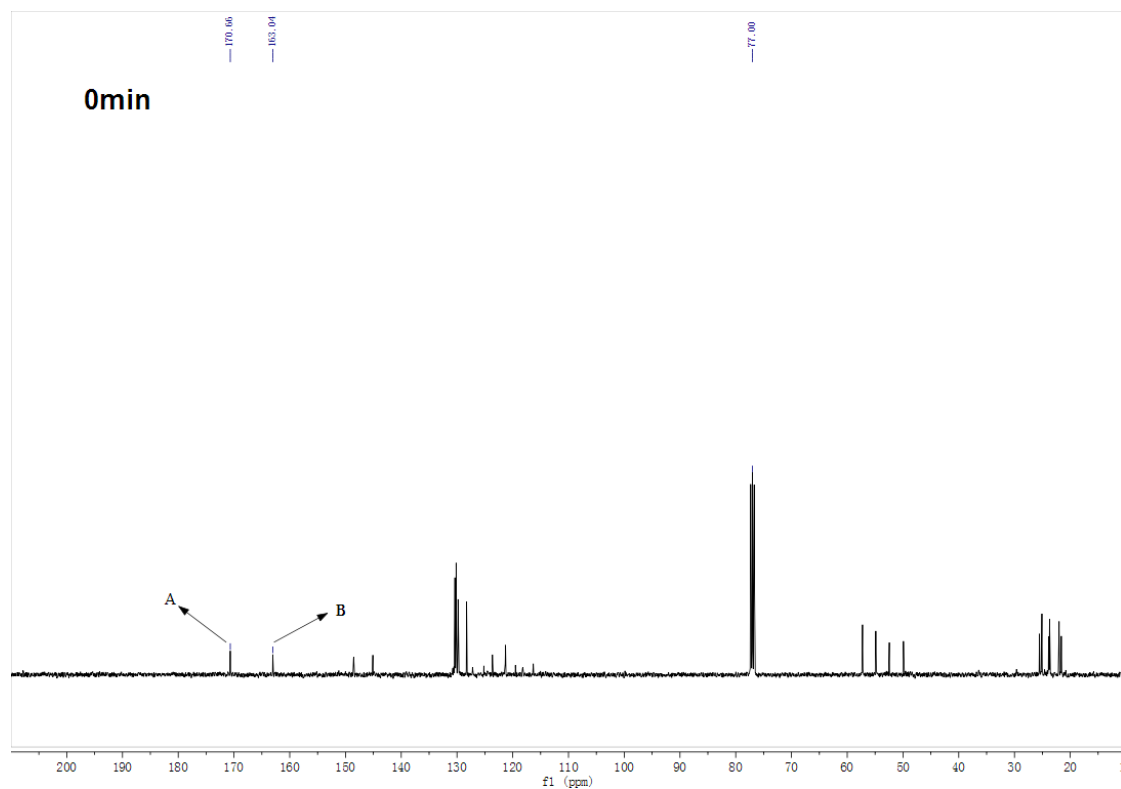

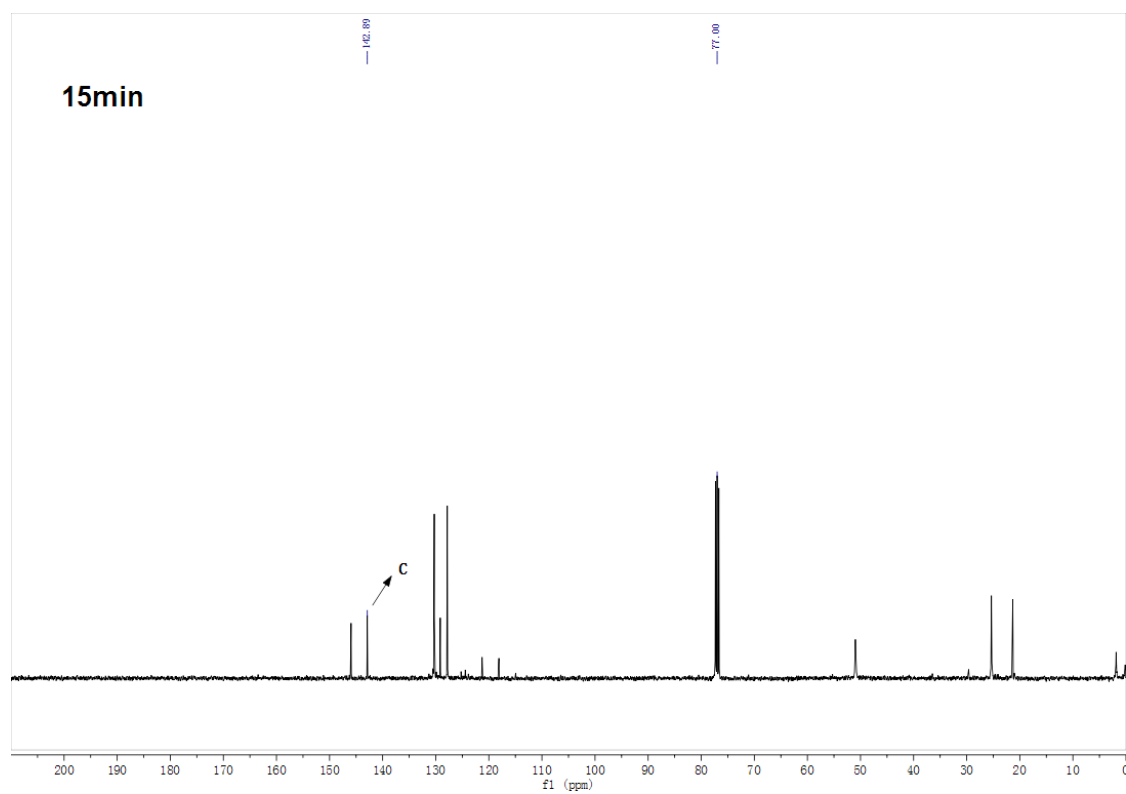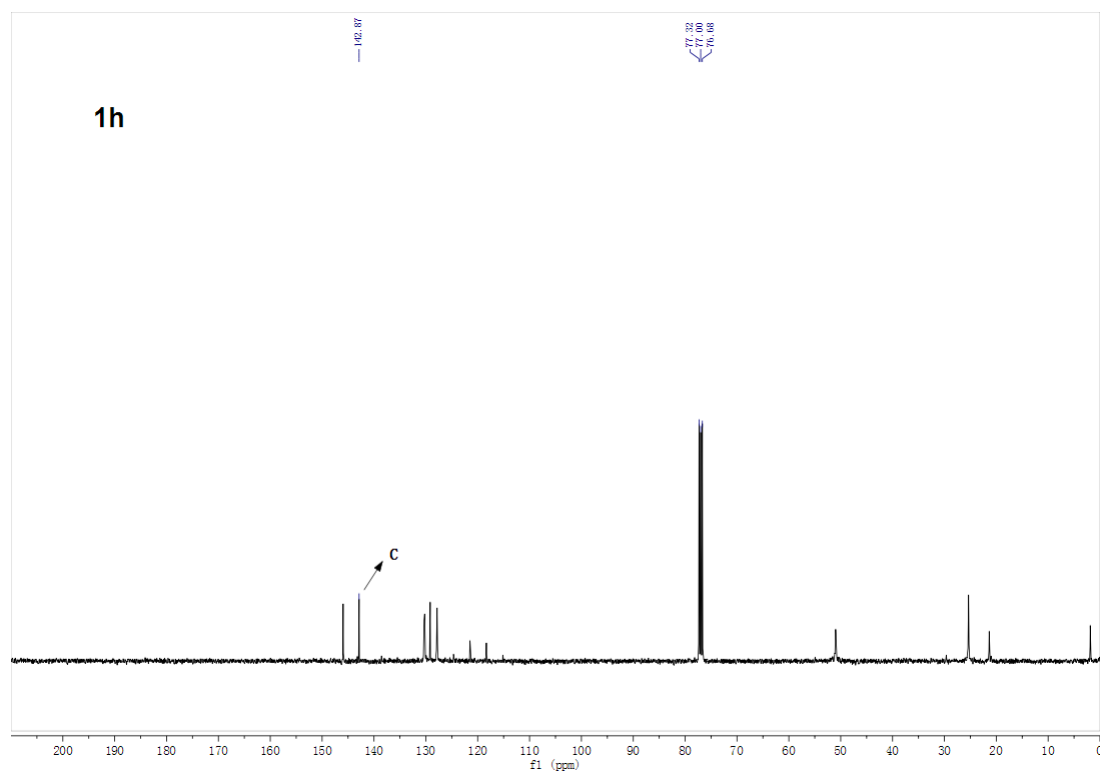



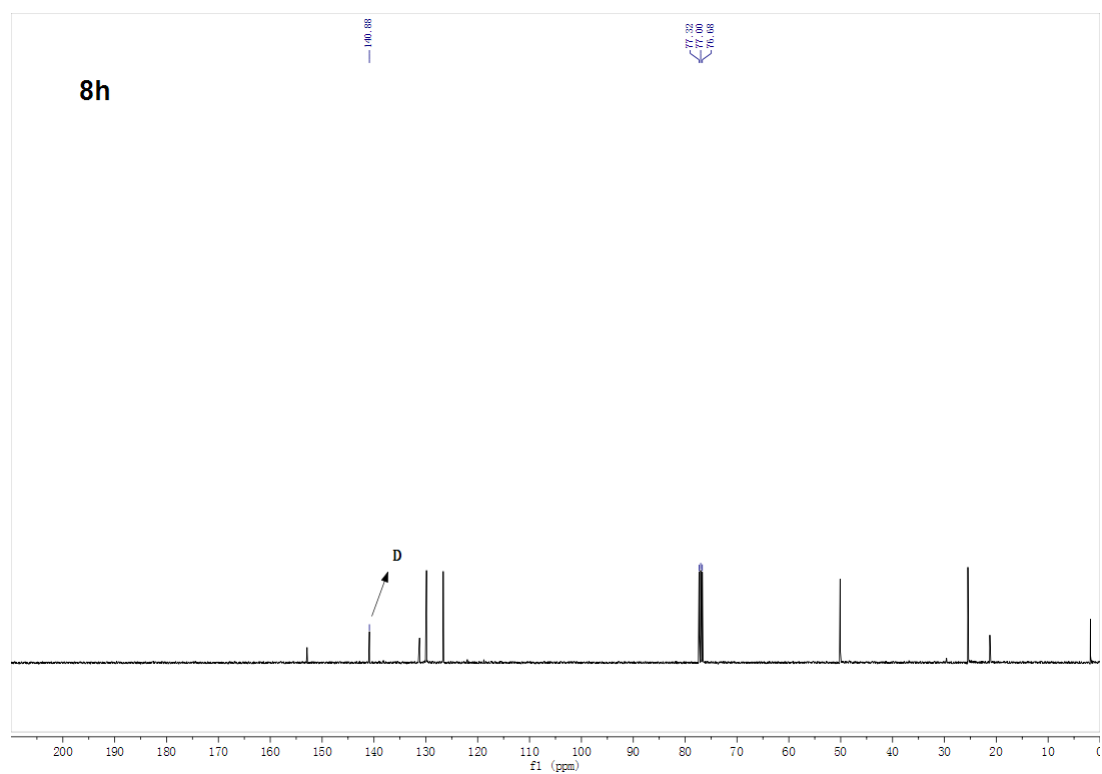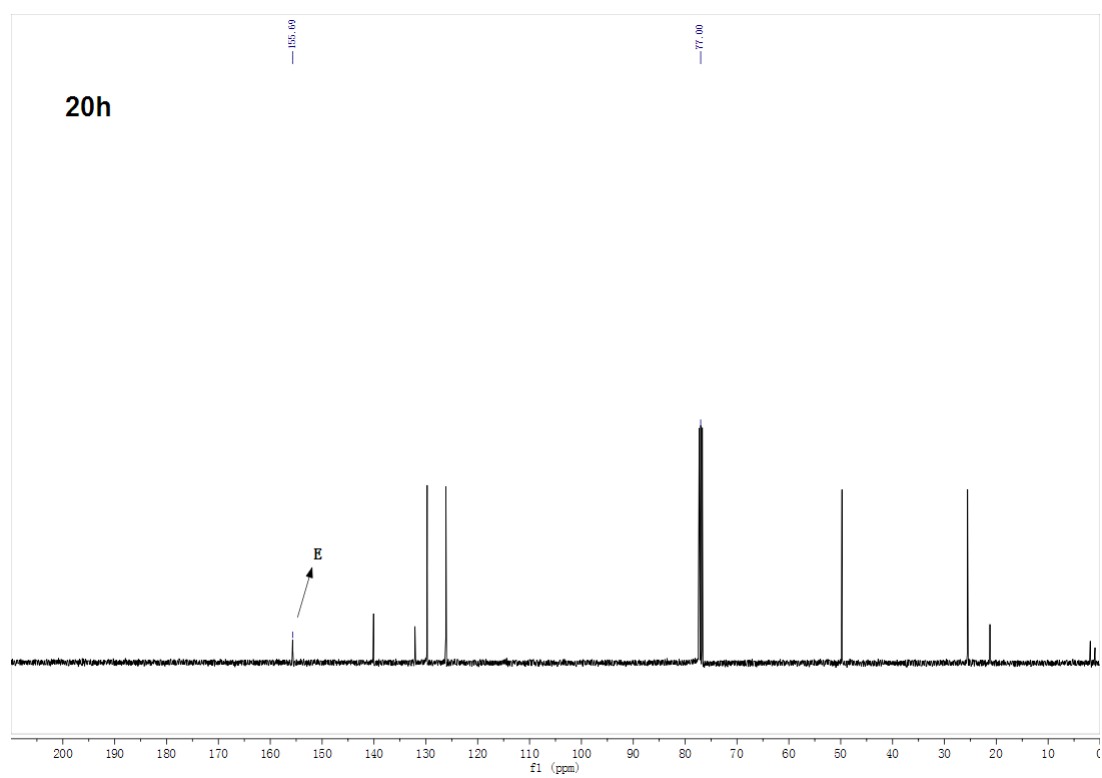

TMSOTf signal has been documented in  $^1\text{H}$  NMR.<sup>[2]</sup>

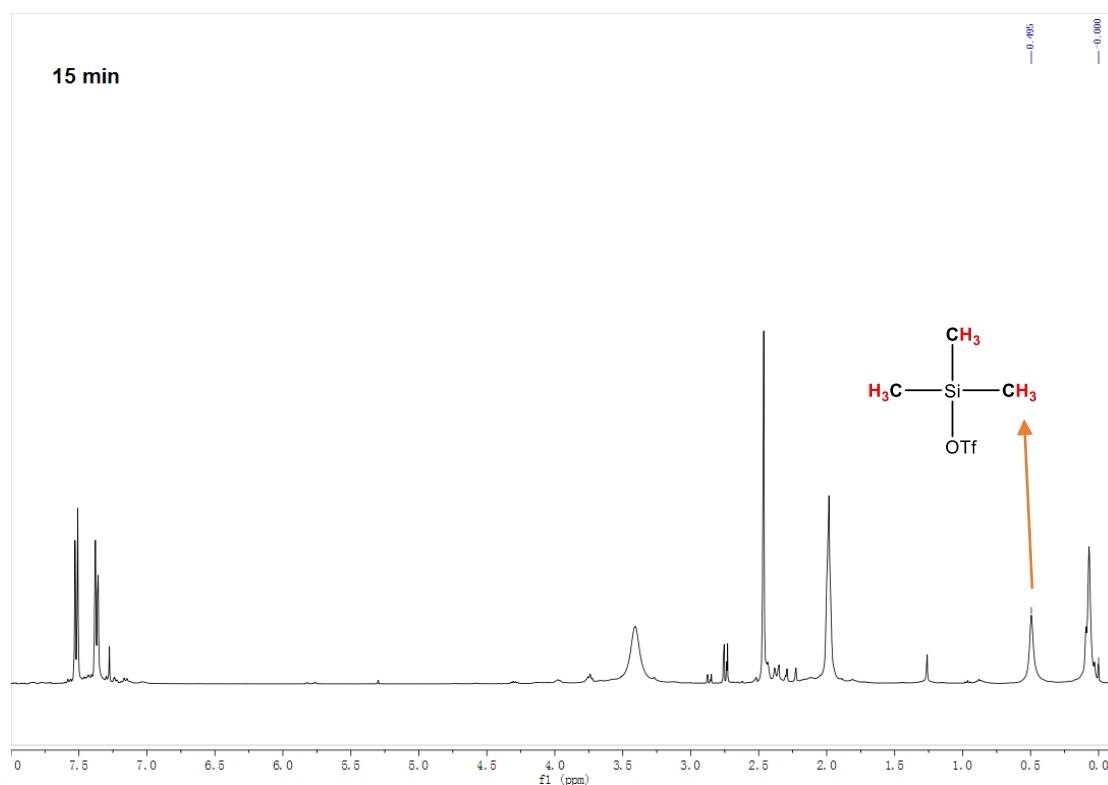

The survey of the role of  $\text{Na}_2\text{CO}_3$  and analysis: monitoring the transformation of **1w** by  $^1\text{H}$  NMR spectroscopy

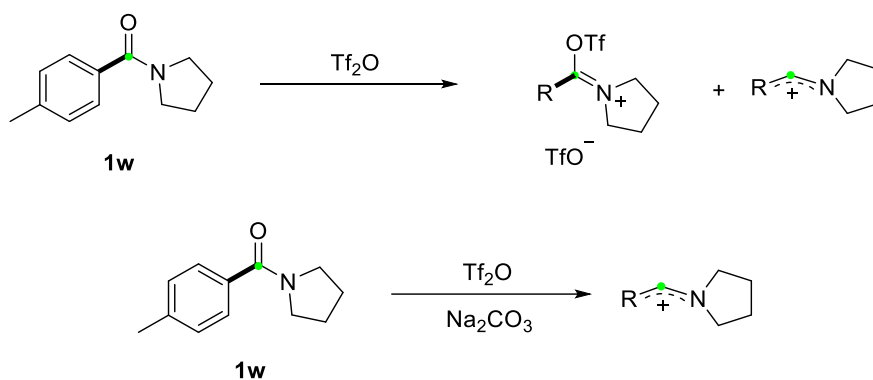

The amide **1w** (0.2 mmol, 1.0 equiv) was added to a dried round bottom flask and put under Ar atmosphere. The DCM (2.0 mL) was added to the flask and the solution was cooled to  $-40\text{ }^\circ\text{C}$ , followed by addition of DCM (1.0 mL) solution of  $\text{Tf}_2\text{O}$  (0.22 mmol) via syringe. The reaction kept under  $-40\text{ }^\circ\text{C}$  for 20 minutes. Then, the reaction was warmed to the room temperature and concentrated in vacuum. The mixture was added to NMR tube and the  $^1\text{H}$  NMR was acquired as **1w**+ $\text{Tf}_2\text{O}$ .

The amide **1w** (0.2 mmol, 1.0 equiv) and  $\text{Na}_2\text{CO}_3$  (0.56 mmol) were added to a dried round bottom flask and put under Ar atmosphere. The DCM (2.0 mL) was added to the flask and the

solution was cooled to -40 °C, followed by addition of DCM (1.0 mL) solution of Tf<sub>2</sub>O (0.22 mmol) via syringe. The reaction kept under -40 °C for 20 minutes. Then, the reaction was warmed to the room temperature and concentrated in vacuum. The mixture was added to NMR tube and the <sup>1</sup>H NMR was acquired as **1w**+Tf<sub>2</sub>O+Na<sub>2</sub>CO<sub>3</sub>.

Analysis: Comparing the spectra of **1w**, **1w**+Tf<sub>2</sub>O, **1w**+Tf<sub>2</sub>O+Na<sub>2</sub>CO<sub>3</sub>, it was noticed that when the amide was treated with Tf<sub>2</sub>O, the system was detected out three sets of CH<sub>3</sub> <sup>1</sup>H NMR signals, and when the sets of CH<sub>3</sub> signals were integrated as 3H in total, the ratio of the CH<sub>3</sub> signals, the aryl part signals and the pyrrolidine part signals was perfectly integrated as 3:4:8. Treated with Tf<sub>2</sub>O and Na<sub>2</sub>CO<sub>3</sub>, the system was detected out two sets of CH<sub>3</sub> <sup>1</sup>H NMR signals, and when the sets of CH<sub>3</sub> signals were integrated as 3H in total, the aryl part signals and the pyrrolidine part signals were perfectly integrated as 4H and 8H as well. Therefore, it was assumed that the system of **1w**+Tf<sub>2</sub>O turned into the mixture of **1w**, intermediate *O*-triflyliminium triflate, keteniminium ion, and the system of **1w**+Tf<sub>2</sub>O+Na<sub>2</sub>CO<sub>3</sub> turned into the mixture of **1w** and keteniminium ion. That showcased the influence of Na<sub>2</sub>CO<sub>3</sub> to the reaction of Tf<sub>2</sub>O-activation process, Na<sub>2</sub>CO<sub>3</sub> could promote the transformation of *O*-triflyliminium triflate into keteniminium ion.

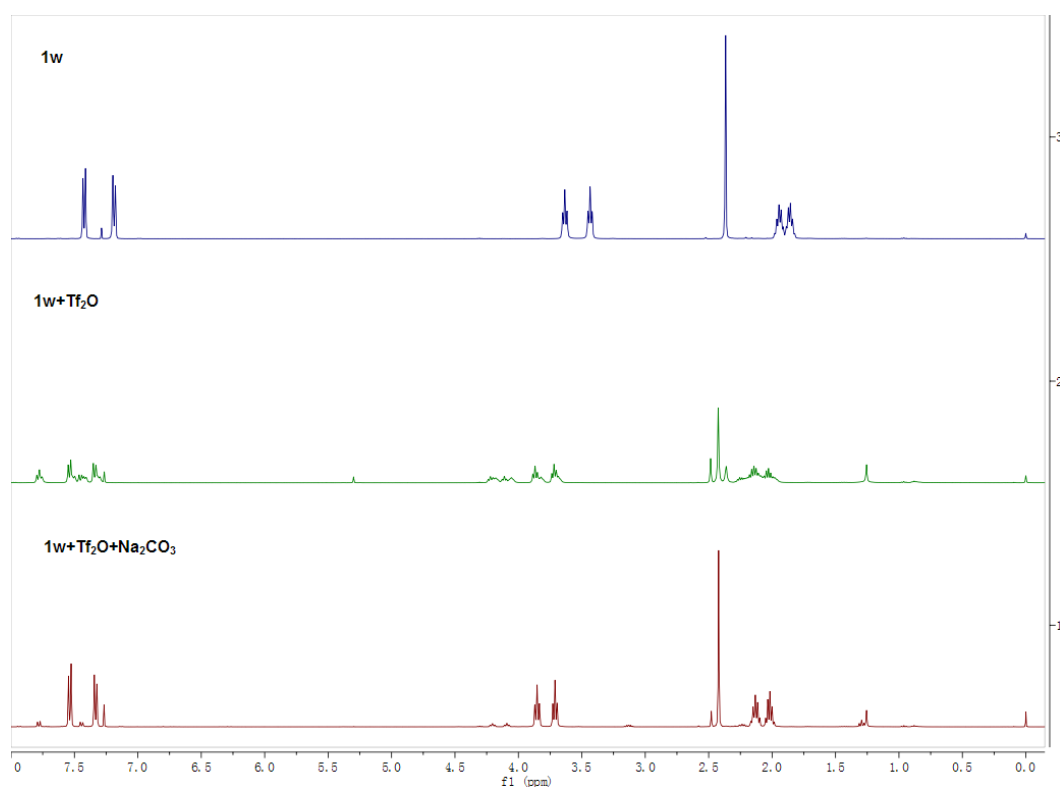

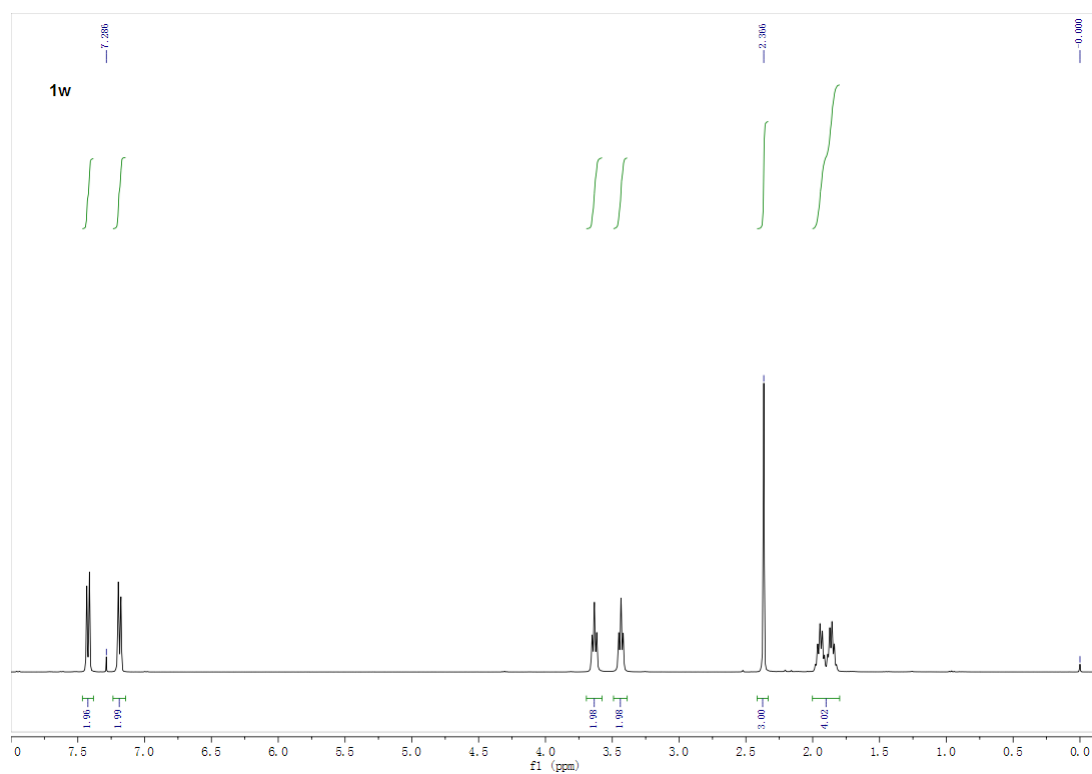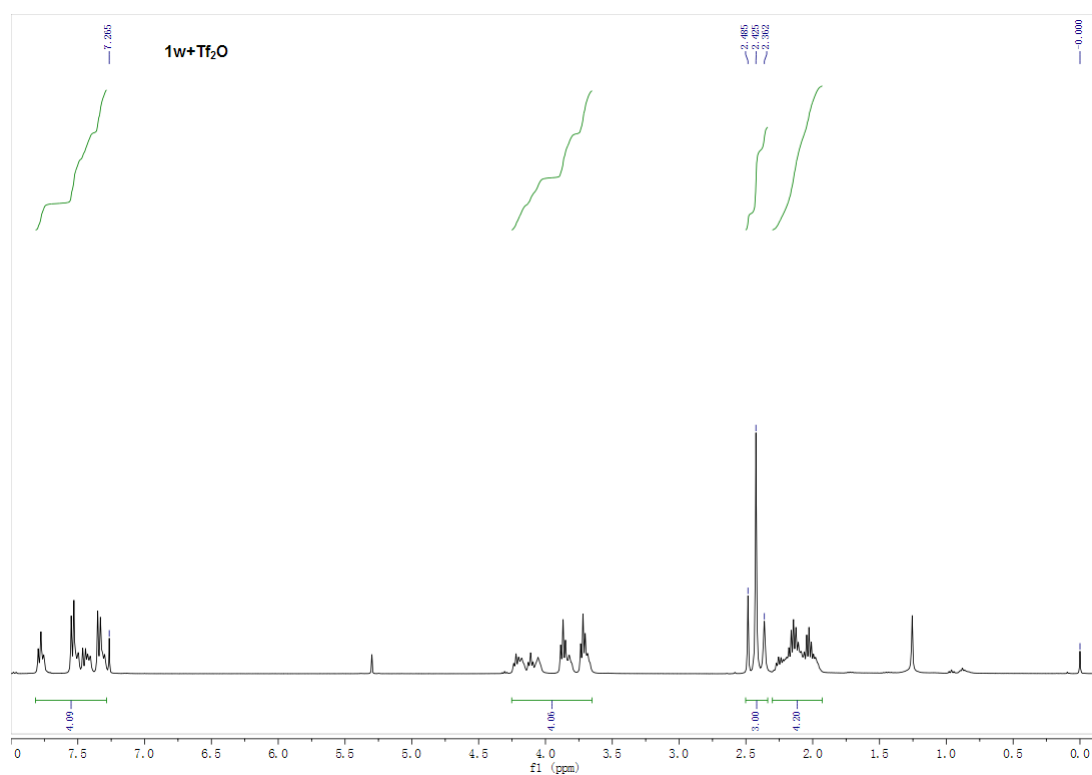

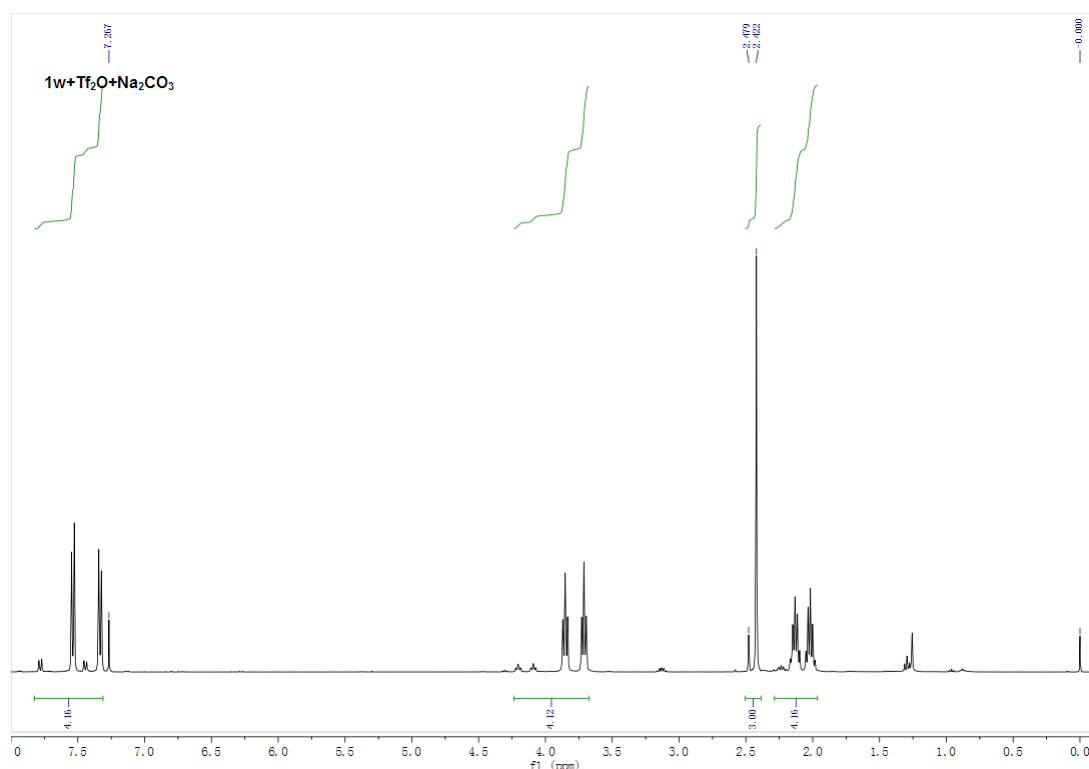

#### The survey of water-quenching intermediate IV and analysis

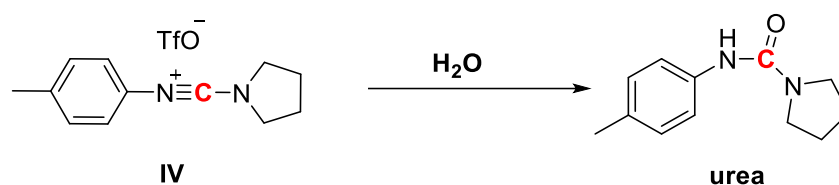

The amide **1w** (0.2 mmol, 1.0 equiv),  $\text{Na}_2\text{CO}_3$  (0.56 mmol) were added to the dried round bottom flask and put under Ar atmosphere. The  $\text{TMSN}_3$  (0.8 mmol), DCM (2.0 mL) were each added to flask and the solution was cooled to  $-40^\circ\text{C}$ , followed by addition of DCM (1.0 mL) solution of  $\text{Tf}_2\text{O}$  (0.22 mmol) via syringe. After 20 minutes, the reaction was heated for 8 hours and quenched by water, transferred to a separation funnel, diluted with DCM (15.0 mL) and the organic layer was washed with water (5.0 mL $\times$ 2) and brine (5.0 mL), dried over anhydrous  $\text{Na}_2\text{SO}_4$ , concentrated in vacuum. The mixture was added to NMR tube and the  $^1\text{H}$  NMR and  $^{13}\text{C}$  NMR were acquired.

Analysis: From the spectra, it is clearly seen that after quenched by water, it could be found a new signal 154 ppm in 8 h-monitoring  $^{13}\text{C}$  NMR spectrum, pointed to the carbonyl carbon of urea, likewise, in the  $^1\text{H}$  NMR spectrum, it is also easy to pick up the signals of  $-\text{NH}-\text{CO}-$  and  $\text{CH}_3$ . It is the case that the intermediate IV could be led to a urea when the system has been quenched by water. The NMR spectra details of the same urea structure can be found in J. Org. Chem. 2018, 83, 913–920.

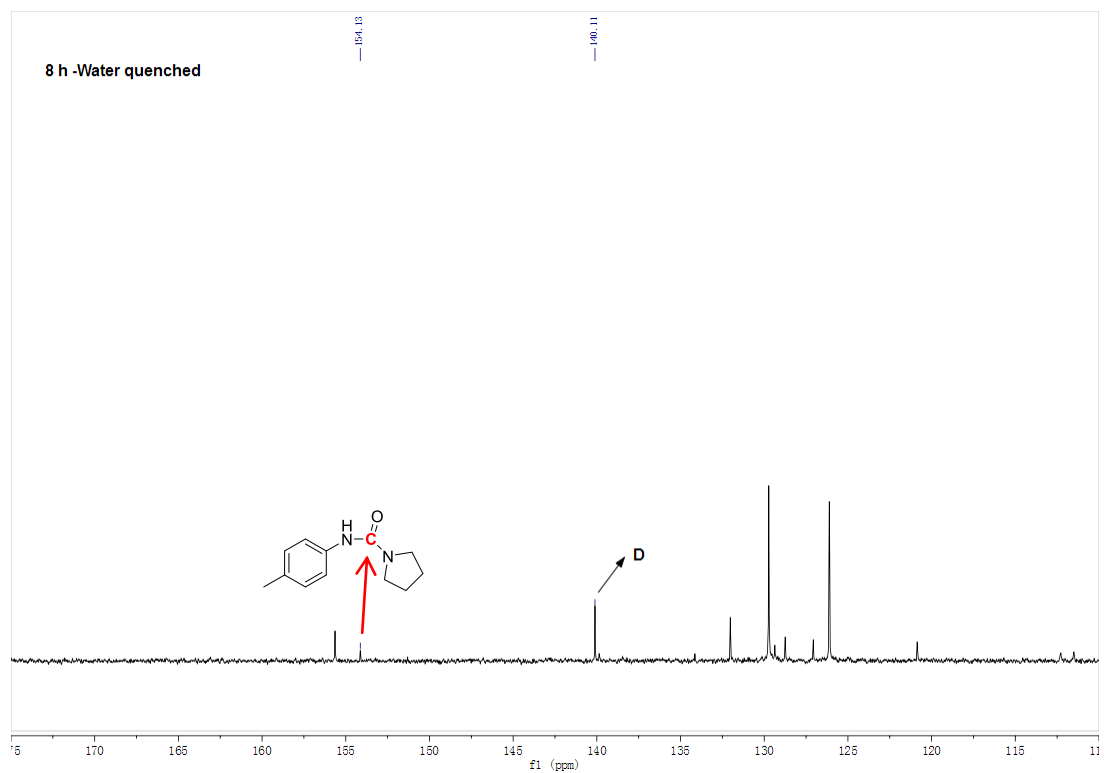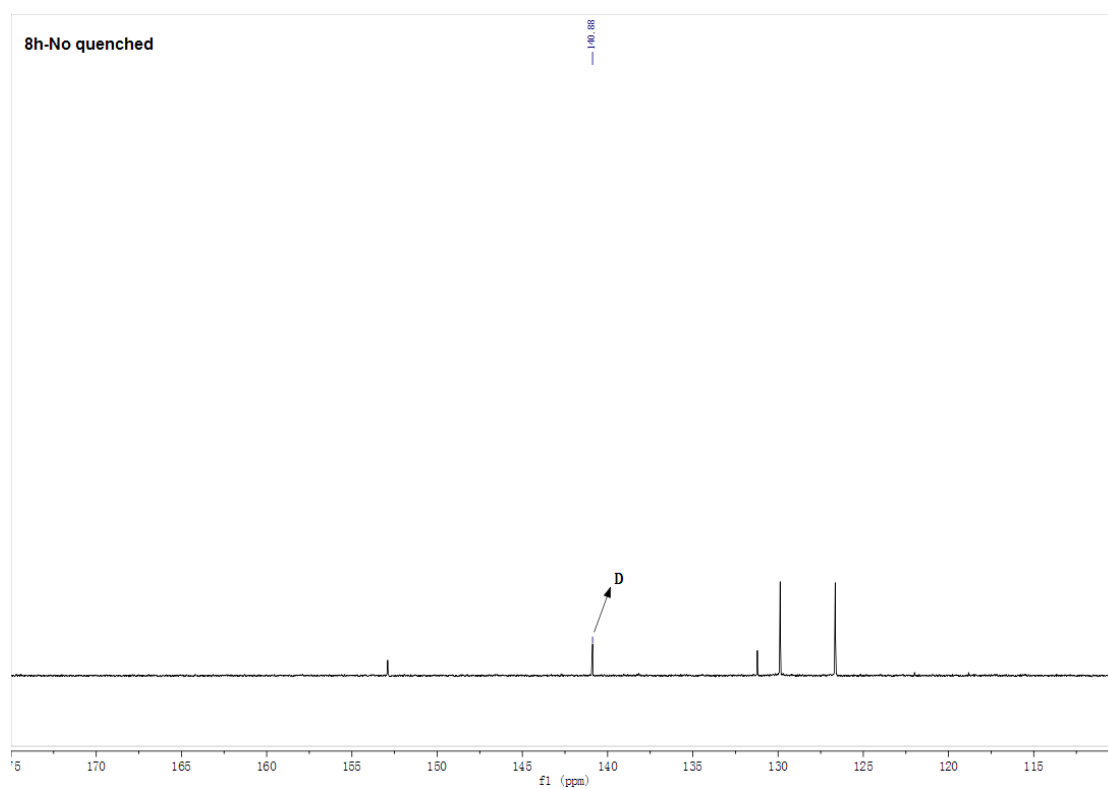

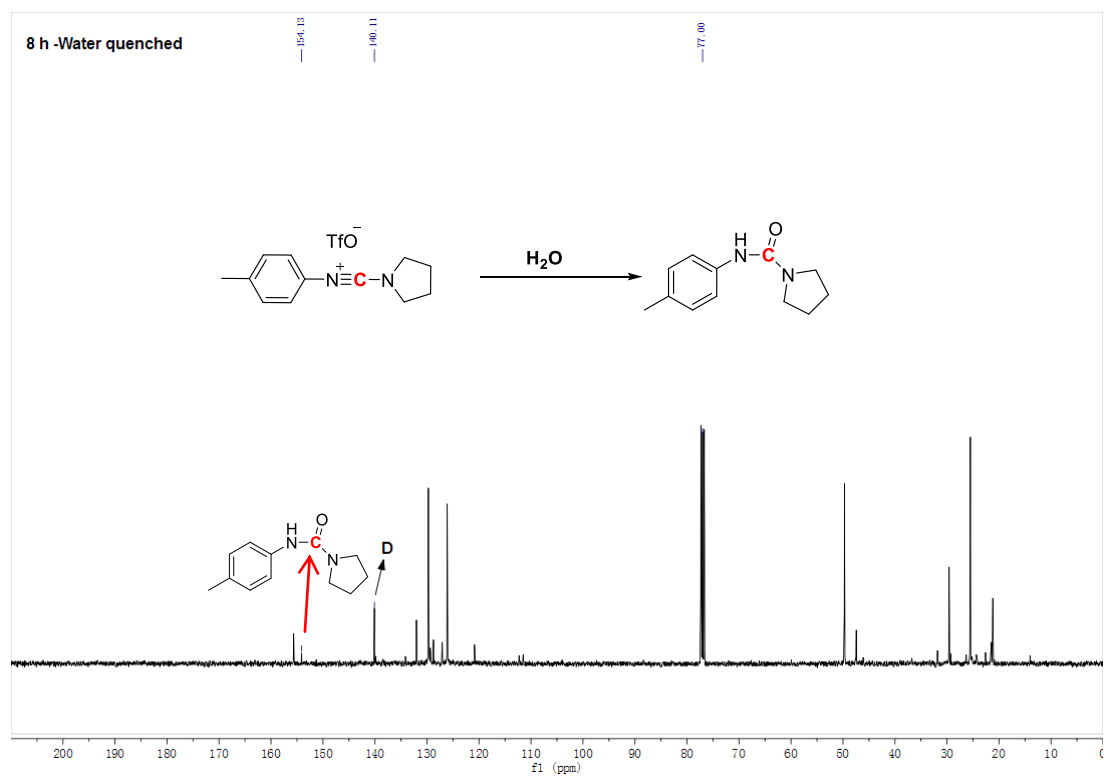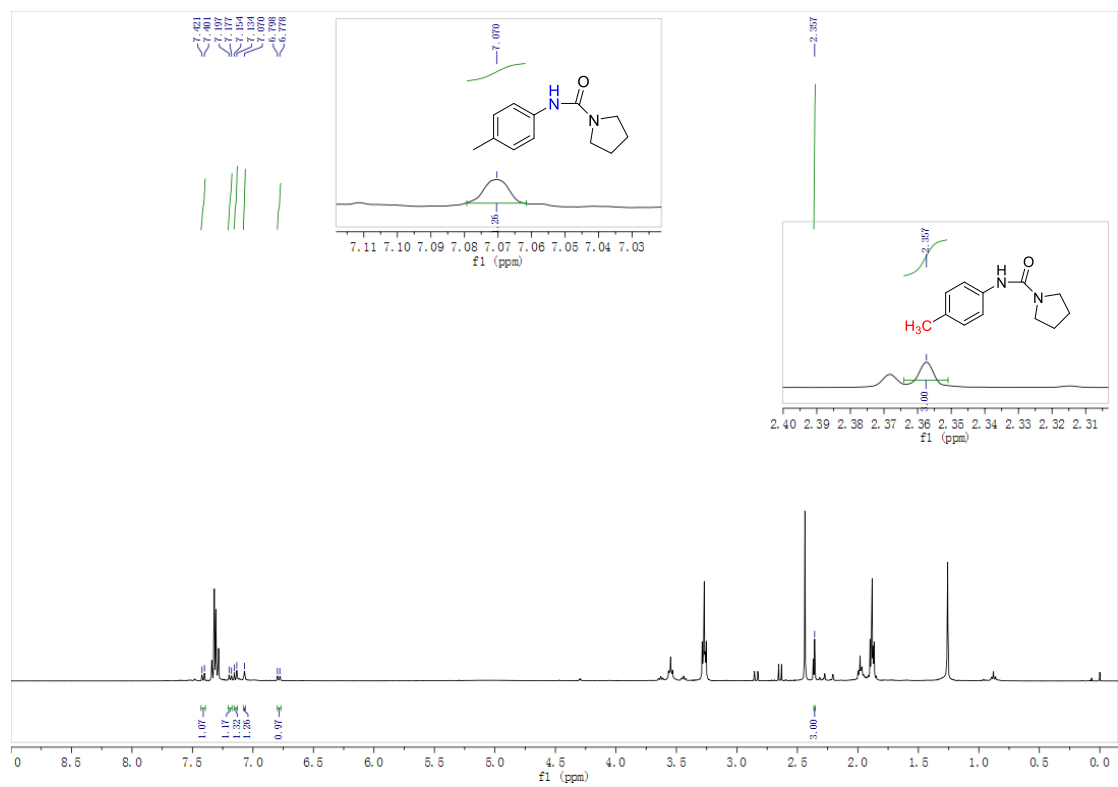

## X-ray structures of Tetrazoles: 3aa, 3ta, 3ua, 3Ra, 7aa

### The crystal structure of product 3aa

Crystallographic data for compound **3aa** (CCDC-1852258) has been deposited with Crystallographic Data Centre, Copies of the data can be obtained, free of charge, on application to CCDC (Email: deposit@ccdc.cam.ac.uk)

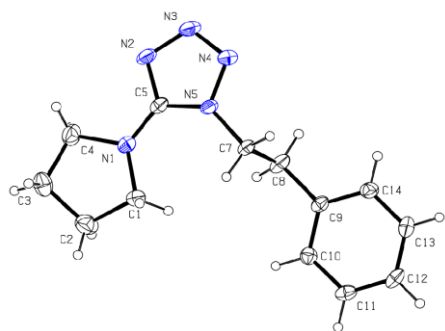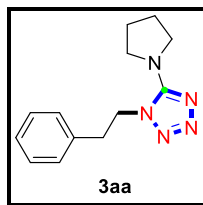

The ellipsoid contour percent probability level is 30% in the caption of the thermal ellipsoid plot.

---

|                                                                         |                                 |                    |
|-------------------------------------------------------------------------|---------------------------------|--------------------|
| Bond precision:                                                         | C-C = 0.0026 Å                  | Wavelength=1.54184 |
| Cell:                                                                   | a=20.970(2)                     | b=7.2564(6)        |
|                                                                         | alpha=90                        | beta=106.224(10)   |
|                                                                         |                                 | gamma=90           |
| Temperature: 290 K                                                      |                                 |                    |
|                                                                         | Calculated                      | Reported           |
| Volume                                                                  | 2540.6(4)                       | 2540.6(4)          |
| Space group                                                             | C 2/c                           | C 1 2/c 1          |
| Hall group                                                              | -C 2yc                          | -C 2yc             |
| Moiety formula                                                          | C13 H17 N5                      | C13 H17 N5         |
| Sum formula                                                             | C13 H17 N5                      | C13 H17 N5         |
| Mr                                                                      | 243.32                          | 243.32             |
| Dx,g cm-3                                                               | 1.272                           | 1.272              |
| Z                                                                       | 8                               | 8                  |
| Mu (mm-1)                                                               | 0.644                           | 0.644              |
| F000                                                                    | 1040.0                          | 1040.0             |
| F000'                                                                   | 1042.82                         |                    |
| h,k,lmax                                                                | 25,8,21                         | 25,8,21            |
| Nref                                                                    | 2409                            | 2362               |
| Tmin,Tmax                                                               | 0.977,0.987                     | 0.507,1.000        |
| Tmin'                                                                   | 0.914                           |                    |
| Correction method= # Reported T Limits: Tmin=0.507 Tmax=1.000 AbsCorr = |                                 |                    |
| MULTI-SCAN                                                              |                                 |                    |
| Data completeness= 0.980                                                | Theta(max)= 69.990              |                    |
| R(reflections)= 0.0453( 1798)                                           | wR2(reflections)= 0.1257( 2362) |                    |
| S = 1.060                                                               | Npar= 163                       |                    |

---



### The crystal structure of product 3ta

Crystallographic data for compound **3ta** (CCDC-1852261) has been deposited with Crystallographic Data Centre. Copies of the data can be obtained, free of charge, on application to CCDC (Email: deposit@ccdc.cam.ac.uk)

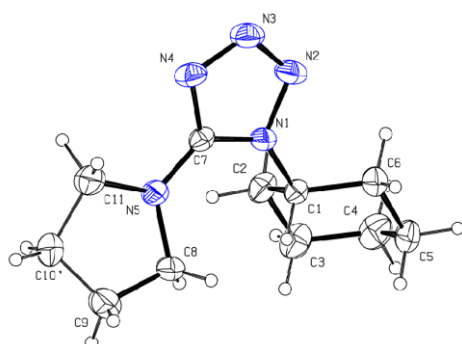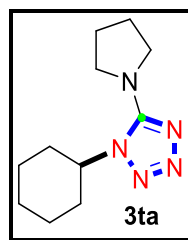

The ellipsoid contour percent probability level is 30% in the caption of the thermal ellipsoid plot.

---

Bond precision: C-C = 0.0037 Å Wavelength=0.71073

Cell: a=6.8335(13) b=9.1979(15) c=10.0075(17)  
alpha=94.814(14) beta=103.101(15) gamma=96.922(14)

Temperature: 293 K

|                        | Calculated  | Reported    |
|------------------------|-------------|-------------|
| Volume                 | 604.13(19)  | 604.14(18)  |
| Space group            | P -1        | P -1        |
| Hall group             | -P 1        | -P 1        |
| Moiety formula         | C11 H19 N5  | C11 H19 N5  |
| Sum formula            | C11 H19 N5  | C11 H19 N5  |
| Mr                     | 221.31      | 221.31      |
| Dx, g cm <sup>-3</sup> | 1.217       | 1.217       |
| Z                      | 2           | 2           |
| Mu (mm <sup>-1</sup> ) | 0.078       | 0.078       |
| F000                   | 240.0       | 240.0       |
| F000'                  | 240.06      |             |
| h,k,lmax               | 8,11,12     | 8,11,12     |
| Nref                   | 2378        | 2371        |
| Tmin,Tmax              | 0.987,0.989 | 0.415,1.000 |
| Tmin'                  | 0.987       |             |

Correction method= # Reported T Limits: Tmin=0.415 Tmax=1.000 AbsCorr = MULTI-SCAN

Data completeness= 0.997 Theta(max)= 26.020

R(reflections)= 0.0627( 1526) wR2(reflections)= 0.1699( 2371)

S = 1.068 Npar= 162

---

### The crystal structure of product 3ua

Crystallographic data for compound **3ua** (CCDC-1852260) has been deposited with Crystallographic Data Centre. Copies of the data can be obtained, free of charge, on application to CCDC (Email: deposit@ccdc.cam.ac.uk)

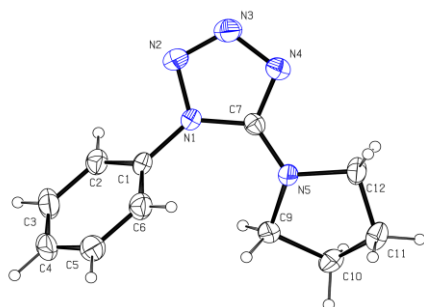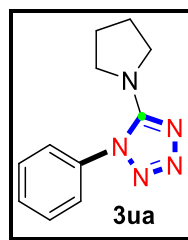

The ellipsoid contour percent probability level is 30% in the caption of the thermal ellipsoid plot.

Bond precision: C-C = 0.0048 Å Wavelength=0.71073

Cell: a=10.2177(10) b=11.0976(11) c=19.154(2)  
alpha=90 beta=90 gamma=90

Temperature: 189 K

|                        | Calculated  | Reported    |
|------------------------|-------------|-------------|
| Volume                 | 2171.9(4)   | 2171.9(4)   |
| Space group            | P b c a     | P b c a     |
| Hall group             | -P 2ac 2ab  | -P 2ac 2ab  |
| Moiety formula         | C11 H13 N5  | C11 H13 N5  |
| Sum formula            | C11 H13 N5  | C11 H13 N5  |
| Mr                     | 215.26      | 215.26      |
| Dx, g cm <sup>-3</sup> | 1.317       | 1.317       |
| Z                      | 8           | 8           |
| Mu (mm <sup>-1</sup> ) | 0.086       | 0.086       |
| F000                   | 912.0       | 912.0       |
| F000'                  | 912.24      |             |
| h,k,lmax               | 12,13,23    | 12,13,23    |
| Nref                   | 2139        | 2138        |
| Tmin,Tmax              | 0.983,0.988 | 0.733,1.000 |
| Tmin'                  | 0.982       |             |

Correction method= # Reported T Limits: Tmin=0.733 Tmax=1.000 AbsCorr =  
MULTI-SCAN

Data completeness= 1.000

Theta(max)= 26.010

R(reflections)= 0.0621( 1089)

wR2(reflections)= 0.1694( 2138)

S = 0.983

Npar= 145

### The crystal structure of product 3Ra

Crystallographic data for compound **3Ra** (CCDC-1852262) has been deposited with Crystallographic Data Centre. Copies of the data can be obtained, free of charge, on application to CCDC (Email: deposit@ccdc.cam.ac.uk)

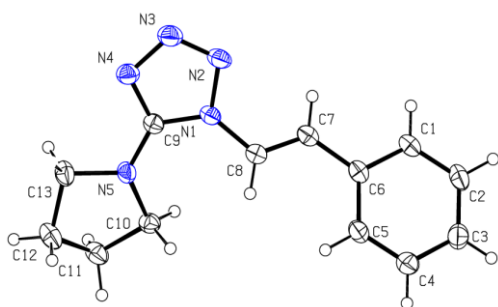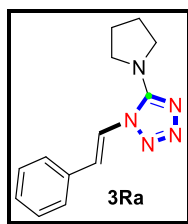

The ellipsoid contour percent probability level is 30% in the caption of the thermal ellipsoid plot.

Bond precision: C-C = 0.0024 Å Wavelength=0.71073

Cell: a=12.0745(8) b=9.2802(7) c=11.0512(6)  
alpha=90 beta=96.656(5) gamma=90

Temperature: 173 K

|                        | Calculated  | Reported    |
|------------------------|-------------|-------------|
| Volume                 | 1229.98(14) | 1229.98(14) |
| Space group            | P 21/c      | P 21/c 1    |
| Hall group             | -P 2ybc     | -P 2ybc     |
| Moiety formula         | C13 H15 N5  | C13 H15 N5  |
| Sum formula            | C13 H15 N5  | C13 H15 N5  |
| Mr                     | 241.30      | 241.30      |
| Dx, g cm <sup>-3</sup> | 1.303       | 1.303       |
| Z                      | 4           | 4           |
| Mu (mm <sup>-1</sup> ) | 0.084       | 0.084       |
| F000                   | 512.0       | 512.0       |
| F000'                  | 512.14      |             |
| h,k,lmax               | 14,11,13    | 14,11,13    |
| Nref                   | 2425        | 2421        |
| Tmin,Tmax              | 0.987,0.990 | 0.786,1.000 |
| Tmin'                  | 0.987       |             |

Correction method= # Reported T Limits: Tmin=0.786 Tmax=1.000 AbsCorr = MULTI-SCAN

Data completeness= 0.998

Theta(max)= 26.020

R(reflections)= 0.0459( 1913)

wR2(reflections)= 0.1112( 2421)

S = 1.116

Npar= 163

### The crystal structure of product 7aa

Crystallographic data for compound **7aa** (CCDC-1852259) has been deposited with Crystallographic Data Centre. Copies of the data can be obtained, free of charge, on application to CCDC (Email: deposit@ccdc.cam.ac.uk)

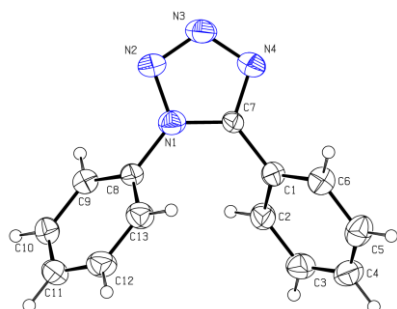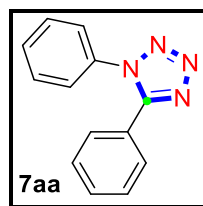

The ellipsoid contour percent probability level is 30% in the caption of the thermal ellipsoid plot.

---

Bond precision: C-C = 0.0039 Å Wavelength=0.71073

Cell: a=10.7182(8) b=7.0388(5) c=14.6427(12)  
alpha=90 beta=90.420(7) gamma=90

Temperature: 295 K

|                        | Calculated  | Reported    |
|------------------------|-------------|-------------|
| Volume                 | 1104.66(15) | 1104.66(14) |
| Space group            | P 21/n      | P 1 21/n 1  |
| Hall group             | -P 2yn      | -P 2yn      |
| Moiety formula         | C13 H10 N4  | C13 H10 N4  |
| Sum formula            | C13 H10 N4  | C13 H10 N4  |
| Mr                     | 222.25      | 222.25      |
| Dx, g cm <sup>-3</sup> | 1.336       | 1.336       |
| Z                      | 4           | 4           |
| Mu (mm <sup>-1</sup> ) | 0.085       | 0.085       |
| F000                   | 464.0       | 464.0       |
| F000'                  | 464.14      |             |
| h,k,lmax               | 13,8,18     | 13,8,18     |
| Nref                   | 2172        | 2163        |
| Tmin,Tmax              | 0.986,0.990 | 0.386,1.000 |
| Tmin'                  | 0.986       |             |

Correction method= # Reported T Limits: Tmin=0.386 Tmax=1.000 AbsCorr =  
MULTI-SCAN

Data completeness= 0.996

Theta(max)= 26.010

R(reflections)= 0.0629( 1401)

wR2(reflections)= 0.1808( 2163)

S = 1.057

Npar= 154

---

## Characterization of compounds

### (3aa) 1-phenethyl-5-(pyrrolidin-1-yl)-1H-tetrazole

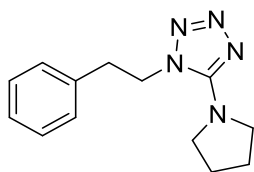

light yellow crystal, 39.4 mg, 81%, m.p. 63-64 °C.

**<sup>1</sup>H NMR (400 MHz, CDCl<sub>3</sub>)**  $\delta$  7.35 – 7.17 (m, 3H), 7.14 – 7.00 (m, 2H), 4.46 (t, *J* = 7.2 Hz, 2H), 3.45 – 3.31 (m, 4H), 3.14 (t, *J* = 7.2 Hz, 2H), 2.09 – 1.77 (m, 4H).

**<sup>13</sup>C NMR (100 MHz, CDCl<sub>3</sub>)**  $\delta$  156.0, 136.6, 128.5, 126.8, 49.1, 48.1, 36.0, 25.3.

**HRMS (ESI<sup>+</sup>):** exact mass calculated for [M+H]<sup>+</sup> (C<sub>13</sub>H<sub>17</sub>N<sub>5</sub>) requires *m/z* 244.1557, found *m/z* 244.1555.

### (3ba) 1-ethyl-5-(pyrrolidin-1-yl)-1H-tetrazole

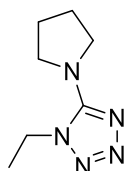

white crystal, 22.4 mg, 67%, m.p. 67-68 °C

**<sup>1</sup>H NMR (400 MHz, CDCl<sub>3</sub>)**  $\delta$  4.33 (q, *J* = 7.2 Hz, 2H), 3.64 – 3.51 (m, 4H), 2.08 – 1.98 (m, 4H), 1.49 (t, *J* = 7.2 Hz, 3H).

**<sup>13</sup>C NMR (100 MHz, CDCl<sub>3</sub>)**  $\delta$  156.1, 49.6, 42.2, 25.52, 15.2.

**HRMS (ESI<sup>+</sup>):** exact mass calculated for [M+H]<sup>+</sup> (C<sub>7</sub>H<sub>13</sub>N<sub>5</sub>) requires *m/z* 168.1244, found *m/z* 168.1243.

### (3ca) 1-propyl-5-(pyrrolidin-1-yl)-1H-tetrazole

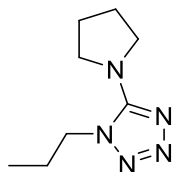

light yellow crystal, 24.9 mg, 69%, m.p. 33-34 °C

**<sup>1</sup>H NMR (400 MHz, CDCl<sub>3</sub>)**  $\delta$  4.23 (t, *J* = 7.2 Hz, 2H), 3.61 – 3.54 (m, 4H), 2.06 – 2.00 (m, 4H), 1.94 – 1.84 (m, 2H), 0.97 (t, *J* = 7.2 Hz, 3H).

**<sup>13</sup>C NMR (100 MHz, CDCl<sub>3</sub>)**  $\delta$  156.2, 49.5, 48.6, 25.5, 23.1, 10.9.

**HRMS (ESI<sup>+</sup>):** exact mass calculated for [M+H]<sup>+</sup> (C<sub>8</sub>H<sub>15</sub>N<sub>5</sub>) requires *m/z* 182.1400, found *m/z* 182.1399.

### (3da) 1-butyl-5-(pyrrolidin-1-yl)-1H-tetrazole

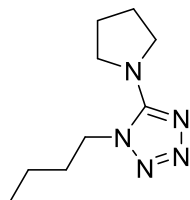

light yellow transparent liquid, 29.2 mg, 75%

**<sup>1</sup>H NMR (400 MHz, CDCl<sub>3</sub>)** δ 4.26 (t, *J* = 7.2 Hz, 3H), 3.61 – 3.54 (m, 4H), 2.07 – 1.99 (m, 4H), 1.88 – 1.79 (m, 2H), 1.43 – 1.33 (m, 2H), 0.96 (t, *J* = 7.2 Hz, 3H).

**<sup>13</sup>C NMR (100 MHz, CDCl<sub>3</sub>)** δ 156.3, 49.7, 46.9, 31.8, 25.6, 19.7, 13.5.

**HRMS (ESI<sup>+</sup>):** exact mass calculated for [M+H]<sup>+</sup> (C<sub>9</sub>H<sub>17</sub>N<sub>5</sub>) requires *m/z* 196.1557, found *m/z* 196.1555.

**(3ea) 1-pentyl-5-(pyrrolidin-1-yl)-1H-tetrazole**

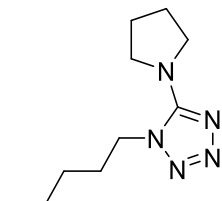

light yellow transparent liquid, 32.1 mg, 77%

**<sup>1</sup>H NMR (400 MHz, CDCl<sub>3</sub>)** δ 4.25 (t, *J* = 6.4 Hz, 2H), 3.60 – 3.54 (m, 4H), 2.06 – 1.99 (m, 4H), 1.90 – 1.81 (m, 2H), 1.40 – 1.29 (m, 4H), 0.91 (t, *J* = 6.8 Hz, 3H).

**<sup>13</sup>C NMR (100 MHz, CDCl<sub>3</sub>)** δ 156.2, 49.6, 47.1, 29.4, 28.5, 25.5, 22.0, 13.8.

**HRMS (ESI<sup>+</sup>):** exact mass calculated for [M+H]<sup>+</sup> (C<sub>10</sub>H<sub>19</sub>N<sub>5</sub>) requires *m/z* 210.1713, found *m/z* 210.1714.

**(3fa) 1-hexyl-5-(pyrrolidin-1-yl)-1H-tetrazole**

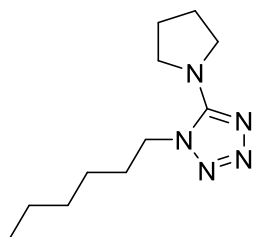

yellow oily liquid, 34.7 mg, 78%

**<sup>1</sup>H NMR (400 MHz, CDCl<sub>3</sub>)** δ 4.28 – 4.22 (m, 2H), 3.60 – 3.54 (m, 4H), 2.06 – 2.00 (m, 4H), 1.89 – 1.80 (m, 2H), 1.38 – 1.26 (m, 6H), 0.93 – 0.84 (m, 3H).

**<sup>13</sup>C NMR (100 MHz, CDCl<sub>3</sub>)** δ 156.2, 49.6, 47.1, 31.1, 29.7, 26.0, 25.5, 22.3, 13.8.

**HRMS (ESI<sup>+</sup>):** exact mass calculated for [M+H]<sup>+</sup> (C<sub>11</sub>H<sub>21</sub>N<sub>5</sub>) requires *m/z* 224.1870, found *m/z* 224.1871.

**(3ga) 1-isopentyl-5-(pyrrolidin-1-yl)-1H-tetrazole**

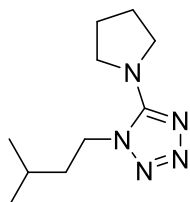

light yellow transparent liquid, 30.1, 72%

**<sup>1</sup>H NMR (400 MHz, CDCl<sub>3</sub>)** δ 4.31 – 4.24 (m, 2H), 3.61 – 3.54 (m, 4H), 2.07 – 2.00 (m, 4H), 1.78 – 1.70 (m, 2H), 1.69 – 1.59 (m, 1H), 0.97 (d, *J* = 6.4 Hz, 6H).

**<sup>13</sup>C NMR (100 MHz, CDCl<sub>3</sub>)** δ 156.2, 49.6, 45.6, 38.4, 25.6, 25.5, 22.2.

**HRMS (ESI<sup>+</sup>):** exact mass calculated for [M+H]<sup>+</sup> (C<sub>10</sub>H<sub>19</sub>N<sub>5</sub>) requires *m/z* 210.1713, found *m/z*

210.1714.

**(3ha) 1-(2-cyclopentylethyl)-5-(pyrrolidin-1-yl)-1H-tetrazole**

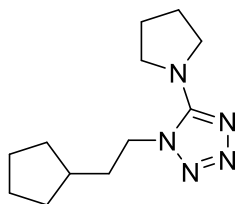

light yellow liquid, 32.0 mg, 68%

**<sup>1</sup>H NMR (400 MHz, CDCl<sub>3</sub>)**  $\delta$  4.31 – 4.24 (m, 2H), 3.62 – 3.53 (m, 4H), 2.07 – 1.99 (m, 4H), 1.90 – 1.72 (m, 5H), 1.69 – 1.48 (m, 4H), 1.18 – 1.07 (m, 2H).

**<sup>13</sup>C NMR (100 MHz, CDCl<sub>3</sub>)**  $\delta$  156.2, 49.6, 46.6, 37.2, 35.9, 32.3, 25.5, 24.9.

**HRMS (ESI<sup>+</sup>):** exact mass calculated for [M+H]<sup>+</sup> (C<sub>12</sub>H<sub>21</sub>N<sub>5</sub>) requires *m/z* 236.1870, found *m/z* 236.1868.

**(3ia) 1-(2-chloroethyl)-5-(pyrrolidin-1-yl)-1H-tetrazole**

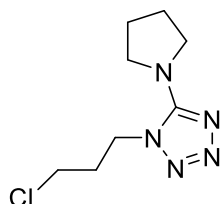

white powder, 23.2 mg, 54%, m.p. 39-40°C.

**<sup>1</sup>H NMR (400 MHz, CDCl<sub>3</sub>)**  $\delta$  4.46 (t, *J* = 7.2 Hz, 2H), 3.65 – 3.57 (m, 6H), 2.43 – 2.33 (m, 2H), 2.08 – 2.00 (m, 4H).

**<sup>13</sup>C NMR (100 MHz, CDCl<sub>3</sub>)**  $\delta$  156.4, 49.7, 44.1, 41.3, 32.1, 25.6.

**HRMS (ESI<sup>+</sup>):** exact mass calculated for [M+H]<sup>+</sup> (C<sub>7</sub>H<sub>12</sub>ClN<sub>5</sub>) requires *m/z* 216.1010, found *m/z* 216.1011.

**(3ja) 1-isobutyl-5-(pyrrolidin-1-yl)-1H-tetrazole**

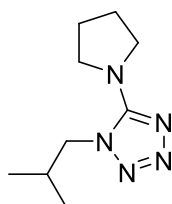

white crystal, 29.2 mg, 75%, m.p. 60-61 °C

**<sup>1</sup>H NMR (400 MHz, CDCl<sub>3</sub>)**  $\delta$  4.07 (d, *J* = 7.2 Hz, 2H), 3.60 – 3.53 (m, 4H), 2.26 – 2.15 (m, 1H), 2.07 – 1.99 (m, 4H), 0.95 (d, *J* = 6.8 Hz, 6H).

**<sup>13</sup>C NMR (100 MHz, CDCl<sub>3</sub>)**  $\delta$  156.4, 54.1, 49.6, 29.0, 25.5, 19.7.

**HRMS (ESI<sup>+</sup>):** exact mass calculated for [M+H]<sup>+</sup> (C<sub>9</sub>H<sub>17</sub>N<sub>5</sub>) requires *m/z* 196.1557, found *m/z* 196.1556.

**(3ka) 5-(pyrrolidin-1-yl)-1-(2,4,4-trimethylpentyl)-1H-tetrazole**

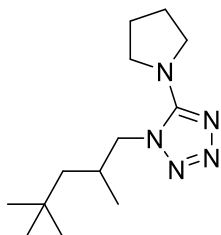

light yellow crystal, 36.1 mg, 72%, m.p. 64-66 °C

**<sup>1</sup>H NMR (400 MHz, CDCl<sub>3</sub>)**  $\delta$  4.12 (dd,  $J$  = 14.6, 7.6 Hz, 1H), 4.00 (dd,  $J$  = 14.0, 8.0 Hz, 1H), 3.59 – 3.52 (m, 4H), 2.17 – 2.09 (m, 1H), 2.06 – 2.00 (m, 4H), 1.26 (dd,  $J$  = 14.0, 2.8 Hz, 1H), 1.13 (dd,  $J$  = 14.1, 7.0 Hz, 1H), 0.94 (d,  $J$  = 6.4 Hz, 3H), 0.85 (s, 9H).

**<sup>13</sup>C NMR (100 MHz, CDCl<sub>3</sub>)**  $\delta$  156.6, 54.1, 49.6, 47.5, 30.8, 30.1, 29.6, 25.5, 20.0.

**HRMS (ESI<sup>+</sup>):** exact mass calculated for [M+H]<sup>+</sup> (C<sub>13</sub>H<sub>25</sub>N<sub>5</sub>) requires  $m/z$  252.2183, found  $m/z$  252.2182.

**(3la) 1-benzyl-5-(pyrrolidin-1-yl)-1H-tetrazole**

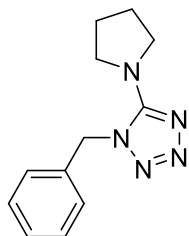

yellow crystal, 24.1 mg, 53%, m.p. 91-93 °C

**<sup>1</sup>H NMR (400 MHz, CDCl<sub>3</sub>)**  $\delta$  4.25 – 4.14 (m, 1H), 3.60 – 3.51 (m, 4H), 2.07 – 1.90 (m, 10H), 1.78 – 1.70 (m, 1H), 1.44 – 1.23 (m, 3H).

**<sup>13</sup>C NMR (100 MHz, CDCl<sub>3</sub>)**  $\delta$  156.0, 135.3, 129.0, 128.2, 126.2, 50.2, 49.4, 25.5.

**HRMS (ESI<sup>+</sup>):** exact mass calculated for [M+H]<sup>+</sup> (C<sub>12</sub>H<sub>15</sub>N<sub>5</sub>) requires  $m/z$  230.1400, found  $m/z$  230.1395.

**(3ma) 5-(pyrrolidin-1-yl)-1-(thiophen-2-ylmethyl)-1H-tetrazole**

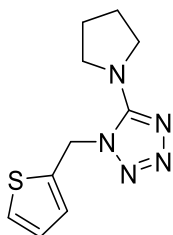

light yellow crystal, 7.5 mg, 16%, m.p. 81-82 °C

**<sup>1</sup>H NMR (400 MHz, CDCl<sub>3</sub>)**  $\delta$  7.31 – 7.25 (m, 1H), 6.98 – 6.91 (m, 2H), 5.63 (s, 2H), 3.60 – 3.55 (m, 4H), 2.00 – 1.95 (m, 4H).

**<sup>13</sup>C NMR (100 MHz, CDCl<sub>3</sub>)**  $\delta$  155.7, 137.1, 127.2, 126.5, 126.2, 49.6, 45.7, 25.7.

**HRMS (ESI<sup>+</sup>):** exact mass calculated for [M+H]<sup>+</sup> (C<sub>10</sub>H<sub>13</sub>N<sub>5</sub>S) requires  $m/z$  236.0964, found  $m/z$  236.0965.

**(3na) 1-isopropyl-5-(pyrrolidin-1-yl)-1H-tetrazole**

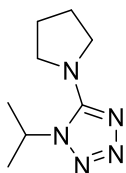



white crystal, 19.2 mg, 53%, m.p. 62-64 °C

**<sup>1</sup>H NMR (400 MHz, CDCl<sub>3</sub>)** δ 4.66 (hept, *J* = 6.6 Hz, 1H), 3.61 – 3.51 (m, 4H), 2.07 – 1.97 (m, 4H), 1.58 (d, *J* = 6.6 Hz, 6H).

**<sup>13</sup>C NMR (100 MHz, CDCl<sub>3</sub>)** δ 156.1, 49.9, 25.5, 22.6.

**HRMS (ESI<sup>+</sup>):** exact mass calculated for [M+H]<sup>+</sup> (C<sub>8</sub>H<sub>15</sub>N<sub>5</sub>) requires *m/z* 182.1400, found *m/z* 182.1398.

**(3oa) 1-(heptan-3-yl)-5-(pyrrolidin-1-yl)-1H-tetrazole**

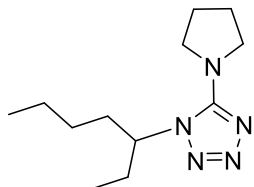

light yellow transparent liquid, 35.1mg, 74%

**<sup>1</sup>H NMR (400 MHz, CDCl<sub>3</sub>)** δ 4.30 – 4.21 (m, 1H), 3.60 – 3.51 (m, 4H), 2.08 – 1.97 (m, 6H), 1.93 – 1.79 (m, 2H), 1.33 – 1.24 (m, 2H), 1.23 – 1.06 (m, 2H), 0.89 – 0.82 (m, 6H).

**<sup>13</sup>C NMR (100 MHz, CDCl<sub>3</sub>)** δ 157.4, 60.3, 50.1, 34.5, 28.2, 28.1, 25.5, 22.3, 13.7, 10.4.

**HRMS (ESI<sup>+</sup>):** exact mass calculated for [M+H]<sup>+</sup> (C<sub>12</sub>H<sub>23</sub>N<sub>5</sub>) requires *m/z* 238.2026, found *m/z* 238.2028.

**(3pa) 1-(1-phenylpropyl)-5-(pyrrolidin-1-yl)-1H-tetrazole**

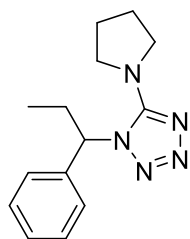

light yellow solid, 34.4 mg, 67%, m.p. 75-77 °C

**<sup>1</sup>H NMR (400 MHz, CDCl<sub>3</sub>)** δ 7.37 – 7.28 (m, 5H), 5.26 (dd, *J* = 8.8, 6.0 Hz, 1H), 3.61 – 3.54 (m, 2H), 3.46 – 3.39 (m, 2H), 2.61 – 2.48 (m, 1H), 2.28 – 2.17 (m, 1H), 1.98 – 1.87 (m, 4H), 0.93 (t, *J* = 7.2 Hz, 3H).

**<sup>13</sup>C NMR (100 MHz, CDCl<sub>3</sub>)** δ 157.3, 139.9, 128.8, 128.1, 126.4, 64.1, 50.2, 30.6, 25.5, 11.4.

**HRMS (ESI<sup>+</sup>):** exact mass calculated for [M+H]<sup>+</sup> (C<sub>14</sub>H<sub>19</sub>N<sub>5</sub>) requires *m/z* 258.1713, found *m/z* 258.1713.

**(3qa) 1-cyclopropyl-5-(pyrrolidin-1-yl)-1H-tetrazole**

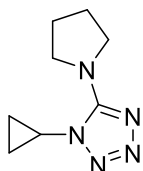

white crystal, 27.2 mg, 76%, m.p. 117-119 °C

**<sup>1</sup>H NMR (400 MHz, CDCl<sub>3</sub>)** δ 3.73 – 3.67 (m, 4H), 3.51 – 3.44 (m, 1H), 2.06 – 1.99 (m, 4H), 1.34 – 1.27 (m, 2H), 1.21 – 1.14 (m, 2H).

**<sup>13</sup>C NMR (100 MHz, CDCl<sub>3</sub>)** δ 157.2, 49.4, 28.0, 25.5, 8.2.

**HRMS (ESI<sup>+</sup>):** exact mass calculated for [M+H]<sup>+</sup> (C<sub>8</sub>H<sub>13</sub>N<sub>5</sub>) requires *m/z* 180.1243, found *m/z* 180.1244.

**(3ra) 1-cyclobutyl-5-(pyrrolidin-1-yl)-1H-tetrazole**

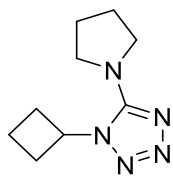

white crystal, 28.9 mg, 75%, m.p. 67-69 °C

**<sup>1</sup>H NMR (400 MHz, CDCl<sub>3</sub>)** δ 4.87 – 4.78 (m, 1H), 3.58 – 3.51 (m, 4H), 2.88 – 2.76 (m, 2H), 2.52 – 2.42 (m, 2H), 2.04 – 1.94 (m, 5H), 1.92 – 1.83 (m, 1H).

**<sup>13</sup>C NMR (100 MHz, CDCl<sub>3</sub>)** δ 156.1, 51.2, 49.9, 30.4, 25.5, 14.9.

**HRMS (ESI<sup>+</sup>):** exact mass calculated for [M+H]<sup>+</sup> (C<sub>9</sub>H<sub>15</sub>N<sub>5</sub>) requires *m/z* 194.1400, found *m/z* 194.1399.

**(3sa) 1-cyclopentyl-5-(pyrrolidin-1-yl)-1H-tetrazole**

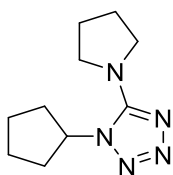

white crystal, 30.6 mg, 74%, m.p. 73-74 °C

**<sup>1</sup>H NMR (400 MHz, CDCl<sub>3</sub>)** δ 4.82 – 4.73 (m, 1H), 3.61 – 3.53 (m, 4H), 2.21 – 2.07 (m, 4H), 2.05 – 1.92 (m, 6H), 1.77 – 1.65 (m, 2H).

**<sup>13</sup>C NMR (100 MHz, CDCl<sub>3</sub>)** δ 156.6, 58.5, 50.0, 33.3, 25.5, 24.4.

**HRMS (ESI<sup>+</sup>):** exact mass calculated for [M+H]<sup>+</sup> (C<sub>10</sub>H<sub>17</sub>N<sub>5</sub>) requires *m/z* 208.1557, found *m/z* 208.1556.

**(3ta) 1-cyclohexyl-5-(pyrrolidin-1-yl)-1H-tetrazole**

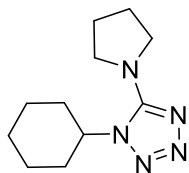

white crystal, 31.3 mg, 71%, m.p. 102-104 °C

**<sup>1</sup>H NMR (400 MHz, CDCl<sub>3</sub>)** δ 4.24 – 4.15 (m, 1H), 3.60 – 3.51 (m, 4H), 2.07 – 1.90 (m, 10H), 1.78 – 1.70 (m, 1H), 1.44 – 1.23 (m, 3H).

**<sup>13</sup>C NMR (100 MHz, CDCl<sub>3</sub>)** δ 156.3, 57.3, 50.0, 32.9, 25.5, 25.4, 24.9.

**HRMS (ESI<sup>+</sup>):** exact mass calculated for [M+H]<sup>+</sup> (C<sub>11</sub>H<sub>19</sub>N<sub>5</sub>) requires *m/z* 222.1713, found *m/z* 222.1709.

**(3ua) 1-phenyl-5-(pyrrolidin-1-yl)-1H-tetrazole**

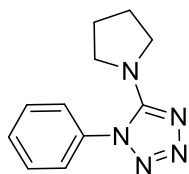

white crystal, 33.1 mg, 77%, m.p. 134-135 °C

**<sup>1</sup>H NMR (400 MHz, CDCl<sub>3</sub>)** δ 7.54 – 7.44 (m, 5H), 3.31 – 3.25 (m, 4H), 1.92 – 1.87 (m, 4H).

**<sup>13</sup>C NMR (100 MHz, CDCl<sub>3</sub>)** δ 155.6, 134.6, 129.7, 129.1, 126.2, 49.8, 25.5.

**HRMS (ESI<sup>+</sup>):** exact mass calculated for [M+H]<sup>+</sup> (C<sub>11</sub>H<sub>13</sub>N<sub>5</sub>) requires *m/z* 216.1244, found *m/z* 216.1244.

**(3va) 1-(4-methoxyphenyl)-5-(pyrrolidin-1-yl)-1H-tetrazole**

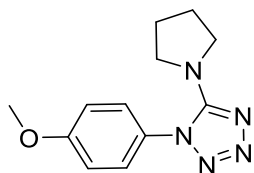

white crystal, 44.1 mg, 90%, m.p. 81-82 °C

**<sup>1</sup>H NMR (400 MHz, CDCl<sub>3</sub>)** δ 7.39 – 7.34 (m, 2H), 7.02 – 6.97 (m, 2H), 3.87 (s, 3H), 3.31 – 3.24 (m, 4H), 1.92 – 1.85 (m, 4H).

**<sup>13</sup>C NMR (100 MHz, CDCl<sub>3</sub>)** δ 160.4, 155.6, 127.8, 127.2, 114.2, 55.6, 49.6, 25.5.

**HRMS (ESI<sup>+</sup>):** exact mass calculated for [M+H]<sup>+</sup> (C<sub>12</sub>H<sub>15</sub>N<sub>5</sub>O) requires *m/z* 246.1349, found *m/z* 246.1348.

**(3wa) 5-(pyrrolidin-1-yl)-1-(p-tolyl)-1H-tetrazole**

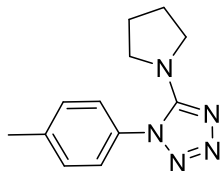

light yellow oily liquid, 38.0 mg, 83%

**<sup>1</sup>H NMR (400 MHz, CDCl<sub>3</sub>)** δ 7.36 – 7.28 (m, 4H), 3.31 – 3.24 (m, 4H), 2.44 (s, 3H), 1.92 – 1.85 (m, 4H).

**<sup>13</sup>C NMR (100 MHz, CDCl<sub>3</sub>)** δ 155.6, 140.0, 132.1, 129.7, 126.1, 49.7, 25.5, 21.2.

**HRMS (ESI<sup>+</sup>):** exact mass calculated for [M+H]<sup>+</sup> (C<sub>12</sub>H<sub>15</sub>N<sub>5</sub>) requires *m/z* 230.1400, found *m/z* 230.1400.

**(3xa) 5-(pyrrolidin-1-yl)-1-(m-tolyl)-1H-tetrazole**

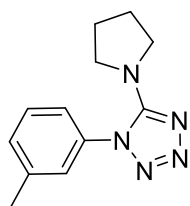

light yellow crystal, 35.7 mg, 78%, m.p. 81-82 °C

**<sup>1</sup>H NMR (400 MHz, CDCl<sub>3</sub>)** δ 7.41 – 7.36 (m, 1H), 7.33 – 7.27 (m, 2H), 7.26 – 7.23 (m, 1H), 3.31 – 3.26 (m, 4H), 2.43 (s, 3H), 1.92 – 1.87 (m, 4H).

**<sup>13</sup>C NMR (100 MHz, CDCl<sub>3</sub>)** δ 155.6, 139.5, 134.5, 130.5, 128.9, 126.7, 123.2, 49.8, 25.5, 21.2.

**HRMS (ESI<sup>+</sup>):** exact mass calculated for [M+H]<sup>+</sup> (C<sub>12</sub>H<sub>15</sub>N<sub>5</sub>) requires *m/z* 230.1400, found *m/z* 230.1400.

**(3ya) 1-(2-methoxyphenyl)-5-(pyrrolidin-1-yl)-1H-tetrazole**

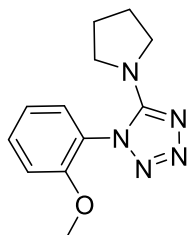

light yellow crystal, 32.3 mg, 66%, m.p. 93-95 °C

**<sup>1</sup>H NMR (400 MHz, CDCl<sub>3</sub>)**  $\delta$  7.52 – 7.47 (m, 1H), 7.37 (dd,  $J$  = 7.6, 1.6 Hz, 1H), 7.08 – 7.02 (m, 2H), 3.81 (s, 3H), 3.30 – 3.24 (m, 4H), 1.89 – 1.84 (m, 4H).

**<sup>13</sup>C NMR (100 MHz, CDCl<sub>3</sub>)**  $\delta$  155.7, 155.4, 131.9, 129.4, 123.6, 120.6, 111.8, 55.9, 48.7, 25.5.

**HRMS (ESI<sup>+</sup>):** exact mass calculated for [M+H]<sup>+</sup> (C<sub>12</sub>H<sub>15</sub>N<sub>5</sub>O) requires  $m/z$  246.1349, found  $m/z$  246.1350.

**(3za) 5-(pyrrolidin-1-yl)-1-(o-tolyl)-1H-tetrazole**

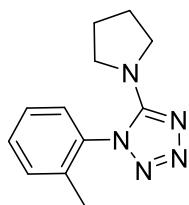

light yellow crystal, 25.6 mg, 56%, m.p. 103-104 °C

**<sup>1</sup>H NMR (400 MHz, CDCl<sub>3</sub>)**  $\delta$  7.47 – 7.41 (m, 1H), 7.37 – 7.31 (m, 3H), 3.26 – 3.19 (m, 4H), 2.14 (s, 3H), 1.90 – 1.85 (m, 4H).

**<sup>13</sup>C NMR (100 MHz, CDCl<sub>3</sub>)**  $\delta$  155.5, 136.3, 133.8, 130.8, 130.5, 128.0, 126.7, 49.1, 25.5, 17.4.

**HRMS (ESI<sup>+</sup>):** exact mass calculated for [M+H]<sup>+</sup> (C<sub>12</sub>H<sub>15</sub>N<sub>5</sub>) requires  $m/z$  230.1400, found  $m/z$  230.1399.

**(3Aa) 1-(4-fluorophenyl)-5-(pyrrolidin-1-yl)-1H-tetrazole**

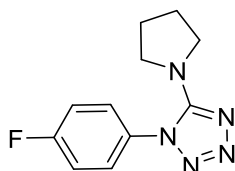

light yellow crystal, 38.2 mg, 82%, m.p. 148-150 °C

**<sup>1</sup>H NMR (400 MHz, CDCl<sub>3</sub>)**  $\delta$  7.51 – 7.44 (m, 2H), 7.25 – 7.18 (m, 2H), 3.32 – 3.25 (m, 4H), 1.94 – 1.89 (m, 4H).

**<sup>13</sup>C NMR (100 MHz, CDCl<sub>3</sub>)**  $\delta$  164.2, 161.7, 155.7, 130.7 (d,  $J$  = 3.0 Hz), 128.3 (d,  $J$  = 9.0 Hz), 116.3 (d,  $J$  = 23.0 Hz), 49.7, 25.6.

**HRMS (ESI<sup>+</sup>):** exact mass calculated for [M+H]<sup>+</sup> (C<sub>11</sub>H<sub>12</sub>FN<sub>5</sub>) requires  $m/z$  234.1150, found  $m/z$  234.1150.

**(3Ba) 1-(4-chlorophenyl)-5-(pyrrolidin-1-yl)-1H-tetrazole**

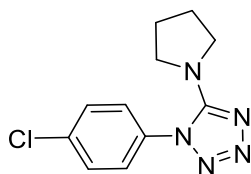

white crystal, 26.3 mg, 53%, m.p. 105-107 °C

**<sup>1</sup>H NMR (400 MHz, CDCl<sub>3</sub>)** δ 7.53 – 7.48 (m, 2H), 7.46 – 7.40 (m, 2H), 3.32 – 3.26 (m, 4H), 1.95 – 1.89 (m, 4H).

**<sup>13</sup>C NMR (100 MHz, CDCl<sub>3</sub>)** δ 155.7, 135.8, 133.2, 129.5, 127.4, 50.0, 25.6.

**HRMS (ESI<sup>+</sup>):** exact mass calculated for [M+H]<sup>+</sup> (C<sub>11</sub>H<sub>12</sub>ClN<sub>5</sub>) requires *m/z* 250.0584, found *m/z* 250.0587.

**(3Ca) 1-(4-bromophenyl)-5-(pyrrolidin-1-yl)-1H-tetrazole**

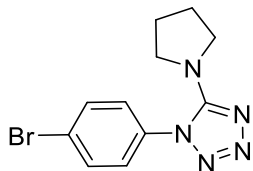

light yellow crystal, 46.8 mg, 80%, m.p. 137-138 °C

**<sup>1</sup>H NMR (400 MHz, CDCl<sub>3</sub>)** δ 7.68 – 7.64 (m, 2H), 7.39 – 7.34 (m, 2H), 3.32 – 3.27 (m, 4H), 1.94 – 1.89 (m, 4H).

**<sup>13</sup>C NMR (100 MHz, CDCl<sub>3</sub>)** δ 155.7, 133.7, 132.5, 127.6, 123.8, 50.1, 25.6.

**HRMS (ESI<sup>+</sup>):** exact mass calculated for [M+H]<sup>+</sup> (C<sub>11</sub>H<sub>12</sub>BrN<sub>5</sub>) requires *m/z* 294.0349, found *m/z* 294.0350.

**(3Da) 1-(3-fluorophenyl)-5-(pyrrolidin-1-yl)-1H-tetrazole**

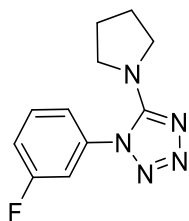

white crystal, 34.1 mg, 73%, m.p. 167-169°C

**<sup>1</sup>H NMR (400 MHz, CDCl<sub>3</sub>)** δ 7.56 – 7.48 (m, 1H), 7.34 – 7.19 (m, 3H), 3.39 – 3.22 (m, 4H), 2.00 – 1.87 (m, 4H).

**<sup>13</sup>C NMR (100 MHz, CDCl<sub>3</sub>)** δ 162.4 (d, *J* = 249.0 Hz), 155.7, 135.8 (d, *J* = 10.0 Hz), 130.5 (d, *J* = 8.0 Hz), 121.9 (d, *J* = 4.0 Hz), 116.9 (d, *J* = 21.0 Hz), 113.7 (d, *J* = 24.0 Hz), 50.0, 25.5.

**HRMS (ESI<sup>+</sup>):** exact mass calculated for [M+H]<sup>+</sup> (C<sub>11</sub>H<sub>12</sub>FN<sub>5</sub>) requires *m/z* 234.1150, found *m/z* 234.1150.

**(3Ea) 1-(3-bromophenyl)-5-(pyrrolidin-1-yl)-1H-tetrazole**

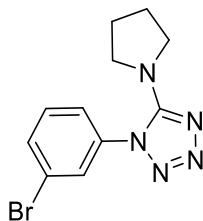

white crystal, 40.4 mg, 69%, m.p. 104°C

**<sup>1</sup>H NMR (400 MHz, CDCl<sub>3</sub>)** δ 7.67 – 7.63 (m, 2H), 7.46 – 7.38 (m, 2H), 3.33 – 3.28 (m, 4H), 1.97 – 1.90 (m, 4H).

**<sup>13</sup>C NMR (100 MHz, CDCl<sub>3</sub>)** δ 155.6, 135.7, 132.8, 130.4, 129.1, 124.7, 122.6, 50.1, 25.6.

**HRMS (ESI<sup>+</sup>):** exact mass calculated for [M+H]<sup>+</sup> (C<sub>11</sub>H<sub>12</sub>BrN<sub>5</sub>) requires *m/z* 294.0349, found *m/z*

294.0351.

**(3Fa) 1-(2-fluorophenyl)-5-(pyrrolidin-1-yl)-1H-tetrazole**

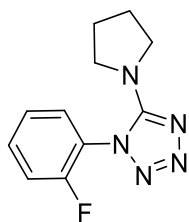

white crystal, 28.8 mg, 62%, m.p. 110-112 °C

**<sup>1</sup>H NMR (400 MHz, CDCl<sub>3</sub>)** δ 7.60 – 7.47 (m, 2H), 7.38 – 7.27 (m, 2H), 3.31 (t, *J* = 6.7 Hz, 4H), 1.95 – 1.86 (m, 4H).

**<sup>13</sup>C NMR (100 MHz, CDCl<sub>3</sub>)** δ 158.6, 156.1, 155.6, 132.3 (d, *J* = 8.0 Hz), 129.5, 124.7 (d, *J* = 3.0 Hz), 122.9 (d, *J* = 13.0 Hz), 116.6 (d, *J* = 19.0 Hz), 49.0, 25.5.

**HRMS (ESI<sup>+</sup>):** exact mass calculated for [M+H]<sup>+</sup> (C<sub>11</sub>H<sub>12</sub>FN<sub>5</sub>) requires *m/z* 234.1150, found *m/z* 234.1154.

**(3Ga) 1-(2-chlorophenyl)-5-(pyrrolidin-1-yl)-1H-tetrazole**

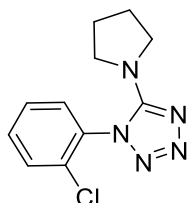

white crystal, 22.4 mg, 45%, m.p. 125-126 °C

**<sup>1</sup>H NMR (400 MHz, CDCl<sub>3</sub>)** δ 7.59 – 7.55 (m, 1H), 7.54 – 7.49 (m, 2H), 7.46 – 7.41 (m, 1H), 3.31 – 3.25 (m, 4H), 1.92 – 1.87 (m, 4H).

**<sup>13</sup>C NMR (100 MHz, CDCl<sub>3</sub>)** δ 155.4, 133.0, 132.8, 131.8, 130.2, 130.0, 127.6, 48.9, 25.6.

**HRMS (ESI<sup>+</sup>):** exact mass calculated for [M+H]<sup>+</sup> (C<sub>11</sub>H<sub>12</sub>ClN<sub>5</sub>) requires *m/z* 250.0584, found *m/z* 250.0586.

**(3Ha) 1-(2-bromophenyl)-5-(pyrrolidin-1-yl)-1H-tetrazole**

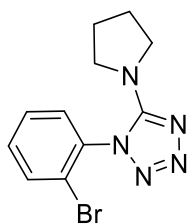

white crystal, 23.4 mg, 40%, m.p. 151-152 °C

**<sup>1</sup>H NMR (400 MHz, CDCl<sub>3</sub>)** δ 7.76 – 7.72 (m, 1H), 7.53 – 7.41 (m, 3H), 3.31 – 3.24 (m, 4H), 1.92 – 1.87 (m, 4H).

**<sup>13</sup>C NMR (100 MHz, CDCl<sub>3</sub>)** δ 155.1, 134.4, 133.4, 131.9, 130.1, 128.2, 123.0, 48.9, 25.6.

**HRMS (ESI<sup>+</sup>):** exact mass calculated for [M+H]<sup>+</sup> (C<sub>11</sub>H<sub>12</sub>BrN<sub>5</sub>) requires *m/z* 294.0349, found *m/z* 294.0352.

**(3Ia) methyl 4-(5-(pyrrolidin-1-yl)-1H-tetrazol-1-yl)benzoate**

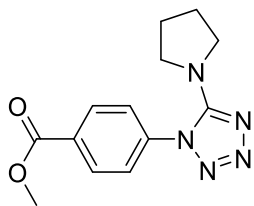

white crystal, 40.4 mg, 74%, m.p. 117-119 °C

**<sup>1</sup>H NMR (400 MHz, CDCl<sub>3</sub>)** δ 8.23 – 8.18 (m, 2H), 7.60 – 7.56 (m, 2H), 3.97 (d, *J* = 1.6 Hz, 3H), 3.34 – 3.27 (m, 4H), 1.95 – 1.89 (m, 4H).

**<sup>13</sup>C NMR (100 MHz, CDCl<sub>3</sub>)** δ 165.7, 155.8, 138.2, 131.2, 130.6, 125.6, 52.5, 50.2, 25.6.

**HRMS (ESI<sup>+</sup>):** exact mass calculated for [M+H]<sup>+</sup> (C<sub>13</sub>H<sub>15</sub>N<sub>5</sub>O<sub>2</sub>) requires *m/z* 274.1299, found *m/z* 274.1301.

**(3Ja) 5-(pyrrolidin-1-yl)-1-(4-(trifluoromethyl)phenyl)-1H-tetrazole**

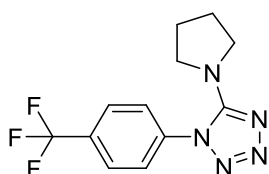

white crystal, 47.5 mg, 84%, m.p. 126-127 °C

**<sup>1</sup>H NMR (400 MHz, CDCl<sub>3</sub>)** δ 7.81 (d, *J* = 8.4 Hz, 2H), 7.66 (d, *J* = 8.4 Hz, 2H), 3.34 – 3.28 (m, 4H), 1.97 – 1.91 (m, 4H).

**<sup>13</sup>C NMR (100 MHz, CDCl<sub>3</sub>)** δ 155.8, 137.6, 131.6 (q, *J* = 33.2 Hz), 126.4 (q, *J* = 3.7 Hz), 126.1, 123.3 (q, *J* = 272.6 Hz), 118.6, 50.3, 25.6.

**HRMS (ESI<sup>+</sup>):** exact mass calculated for [M+H]<sup>+</sup> (C<sub>12</sub>H<sub>12</sub>F<sub>3</sub>N<sub>5</sub>) requires *m/z* 284.1118, found *m/z* 284.1118.

**(3Ka) 4-(5-(pyrrolidin-1-yl)-1H-tetrazol-1-yl)benzonitrile**

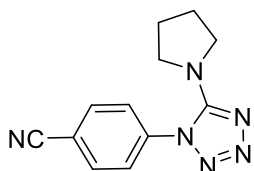

white crystal, 29.2 mg, 61%, m.p. 177-178 °C

**<sup>1</sup>H NMR (400 MHz, CDCl<sub>3</sub>)** δ 7.86 (d, *J* = 8.4 Hz, 2H), 7.67 (d, *J* = 8.8 Hz, 2H), 3.35 – 3.27 (m, 4H), 2.00 – 1.92 (m, 4H).

**<sup>13</sup>C NMR (100 MHz, CDCl<sub>3</sub>)** δ 155.8, 138.1, 133.2, 126.1, 117.4, 113.4, 50.5, 25.6.

**HRMS (ESI<sup>+</sup>):** exact mass calculated for [M+H]<sup>+</sup> (C<sub>12</sub>H<sub>12</sub>N<sub>6</sub>) requires *m/z* 241.1196, found *m/z* 241.1196.

**(3La) 1-(4-nitrophenyl)-5-(pyrrolidin-1-yl)-1H-tetrazole**

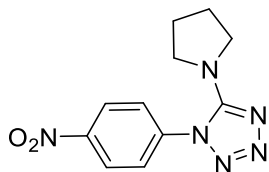

orange solid, 29.6 mg, 57%, m.p. 134-136 °C

**<sup>1</sup>H NMR (400 MHz, CDCl<sub>3</sub>)** δ 8.44 – 8.39 (m, 2H), 7.76 – 7.71 (m, 2H), 3.37 – 3.30 (m, 4H), 2.00 – 1.94 (m, 4H).

**<sup>13</sup>C NMR (100 MHz, CDCl<sub>3</sub>)** δ 156.0, 147.8, 139.6, 126.1, 124.7, 50.6, 25.6.

**HRMS (ESI<sup>+</sup>):** exact mass calculated for [M+H]<sup>+</sup> (C<sub>11</sub>H<sub>12</sub>N<sub>6</sub>O<sub>2</sub>) requires *m/z* 261.1095, found *m/z* 261.1097.

**(3Ma) 1-(naphthalen-1-yl)-5-(pyrrolidin-1-yl)-1H-tetrazole**

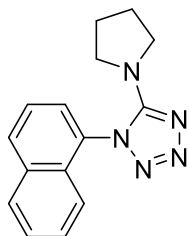

brown-red crystal, 35.5 mg, 67%, m.p. 127-128 °C

**<sup>1</sup>H NMR (400 MHz, CDCl<sub>3</sub>)** δ 8.08 – 8.02 (m, 1H), 7.98 – 7.95 (m, 1H), 7.61 – 7.53 (m, 4H), 7.45 (d, *J* = 8.0 Hz, 1H), 3.15 (s, 4H), 1.80 – 1.73 (m, 4H).

**<sup>13</sup>C NMR (100 MHz, CDCl<sub>3</sub>)** δ 156.3, 133.8, 130.9, 130.9, 130.4, 128.3, 127.2, 126.0, 124.7, 122.1, 49.0, 25.4.

**HRMS (ESI<sup>+</sup>):** exact mass calculated for [M+H]<sup>+</sup> (C<sub>15</sub>H<sub>15</sub>N<sub>5</sub>) requires *m/z* 266.1400, found *m/z* 266.1400.

**(3Na) 1-(naphthalen-2-yl)-5-(pyrrolidin-1-yl)-1H-tetrazole**

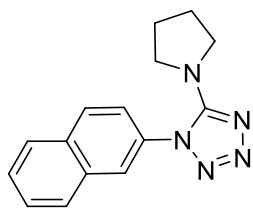

yellow crystal, 30.7 mg, 58%, m.p. 118-120 °C

**<sup>1</sup>H NMR (400 MHz, CDCl<sub>3</sub>)** δ 8.01 – 7.89 (m, 4H), 7.64 – 7.58 (m, 2H), 7.57 – 7.52 (m, 1H), 3.34 – 3.27 (m, 4H), 1.91 – 1.84 (m, 4H).

**<sup>13</sup>C NMR (100 MHz, CDCl<sub>3</sub>)** δ 155.9, 133.2, 132.6, 132.0, 129.4, 128.2, 127.9, 127.6, 127.5, 125.1, 123.5, 50.0, 25.6.

**HRMS (ESI<sup>+</sup>):** exact mass calculated for [M+H]<sup>+</sup> (C<sub>15</sub>H<sub>15</sub>N<sub>5</sub>) requires *m/z* 266.1400, found *m/z* 266.1400.

**(3Oa) 1-(furan-2-yl)-5-(pyrrolidin-1-yl)-1H-tetrazole**

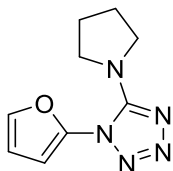

red-brown crystal, 18.9 mg, 46%, m.p. 98 °C

**<sup>1</sup>H NMR (400 MHz, CDCl<sub>3</sub>)** δ 7.49 – 7.47 (m, 1H), 6.62 (d, *J* = 3.2 Hz, 1H), 6.59 – 6.56 (m, 1H), 3.36 – 3.30 (m, 4H), 1.97 – 1.91 (m, 4H).

**<sup>13</sup>C NMR (100 MHz, CDCl<sub>3</sub>)** δ 155.5, 142.0, 142.0, 139.0, 111.9, 109.2, 48.5, 25.6.

**HRMS (ESI<sup>+</sup>):** exact mass calculated for [M+H]<sup>+</sup> (C<sub>9</sub>H<sub>11</sub>N<sub>5</sub>O) requires *m/z* 206.1036, found *m/z*



206.1035.

**(3Pa) 5-(pyrrolidin-1-yl)-1-(thiophen-2-yl)-1H-tetrazole**

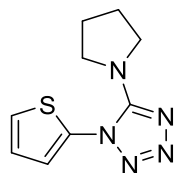

black crystal, 36.2 mg, 82%, m.p. 121-122 °C

**<sup>1</sup>H NMR (400 MHz, CDCl<sub>3</sub>)** δ 7.46 – 7.42 (m, 1H), 7.24 – 7.21 (m, 1H), 7.08 – 7.05 (m, 1H), 3.40 – 3.33 (m, 4H), 1.95 – 1.89 (m, 4H).

**<sup>13</sup>C NMR (100 MHz, CDCl<sub>3</sub>)** δ 155.8, 134.1, 127.6, 127.0, 125.7, 49.0, 25.5.

**HRMS (ESI<sup>+</sup>):** exact mass calculated for [M+H]<sup>+</sup> (C<sub>9</sub>H<sub>11</sub>N<sub>5</sub>S) requires *m/z* 222.0808, found *m/z* 222.0808.

**(3Qa) 2-chloro-5-(5-(pyrrolidin-1-yl)-1H-tetrazol-1-yl)pyridine**

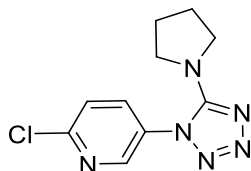

white crystal, 40.5 mg, 81%, m.p. 146-148 °C

**<sup>1</sup>H NMR (400 MHz, CDCl<sub>3</sub>)** δ 8.56 (d, *J* = 2.8 Hz, 1H), 7.86 (dd, *J* = 8.8, 2.8 Hz, 1H), 7.55 (d, *J* = 8.8 Hz, 1H), 3.35 – 3.27 (m, 4H), 2.00 – 1.92 (m, 4H).

**<sup>13</sup>C NMR (100 MHz, CDCl<sub>3</sub>)** δ 155.7, 152.4, 146.4, 135.9, 130.6, 124.8, 50.3, 25.6.

**HRMS (ESI<sup>+</sup>):** exact mass calculated for [M+H]<sup>+</sup> (C<sub>10</sub>H<sub>11</sub>ClN<sub>6</sub>) requires *m/z* 251.0826, found *m/z* 251.0811

**(3Ra) (E)-5-(pyrrolidin-1-yl)-1-styryl-1H-tetrazole**

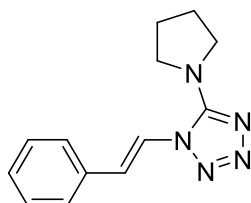

orange crystal, 37.5 mg, 78%, m.p. 99-100 °C

**<sup>1</sup>H NMR (400 MHz, CDCl<sub>3</sub>)** δ 7.45 – 7.32 (m, 6H), 7.23 (d, *J* = 14.0 Hz, 1H), 3.66 (t, *J* = 6.4 Hz, 4H), 2.06 – 2.01 (m, 4H).

**<sup>13</sup>C NMR (100 MHz, CDCl<sub>3</sub>)** δ 154.9, 133.7, 128.9, 128.7, 126.6, 125.7, 118.8, 50.2, 25.6.

**HRMS (ESI<sup>+</sup>):** exact mass calculated for [M+H]<sup>+</sup> (C<sub>13</sub>H<sub>13</sub>N<sub>5</sub>) requires *m/z* 242.1400, found *m/z* 242.1401.

**(3Sa) (E)-1-(prop-1-en-1-yl)-5-(pyrrolidin-1-yl)-1H-tetrazole**

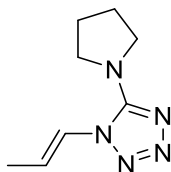

white crystal, 6.4 mg, 18%, m.p. 108-110 °C

**<sup>1</sup>H NMR (400 MHz, CDCl<sub>3</sub>)**  $\delta$  6.76 (dq,  $J$  = 13.6, 1.6 Hz, 1H), 6.31 (dq,  $J$  = 13.6, 6.8 Hz, 1H), 3.61 – 3.56 (m, 4H), 2.03 – 1.98 (m, 4H), 1.89 (dd,  $J$  = 6.8, 1.6 Hz, 3H).

**<sup>13</sup>C NMR (100 MHz, CDCl<sub>3</sub>)**  $\delta$  154.7, 124.7, 12.0, 50.0, 25.6, 15.2.

**HRMS (ESI<sup>+</sup>):** exact mass calculated for [M+H]<sup>+</sup> (C<sub>8</sub>H<sub>13</sub>N<sub>5</sub>) requires  $m/z$  180.1244, found  $m/z$  180.1246.

**(5aa) N-methyl-1-phenethyl-N-phenyl-1H-tetrazol-5-amine**

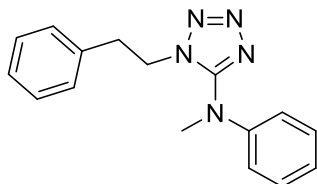

light yellow liquid, 27.9 mg, 50%

**<sup>1</sup>H NMR (400 MHz, CDCl<sub>3</sub>)**  $\delta$  7.41 – 7.34 (m, 2H), 7.27 – 7.17 (m, 2H), 6.95 – 6.90 (m, 2H), 6.84 – 6.80 (m, 2H), 3.90 (t,  $J$  = 7.6 Hz, 2H), 3.33 (s, 3H), 2.91 (t,  $J$  = 7.6 Hz, 2H).

**<sup>13</sup>C NMR (100 MHz, CDCl<sub>3</sub>)**  $\delta$  156.9, 145.2, 136.5, 130.0, 128.6, 127.0, 125.3, 122.2, 48.5, 42.3, 35.1.

**HRMS (ESI<sup>+</sup>):** exact mass calculated for [M+H]<sup>+</sup> (C<sub>16</sub>H<sub>17</sub>N<sub>5</sub>) requires  $m/z$  280.1557, found  $m/z$  280.1563.

**(5ba) N-ethyl-1-phenethyl-N-phenyl-1H-tetrazol-5-amine**

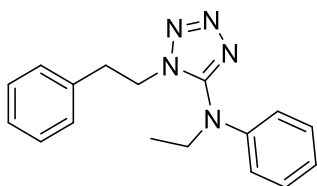

brown-red oily liquid, 18.1 mg, 31% •

**<sup>1</sup>H NMR (400 MHz, CDCl<sub>3</sub>)**  $\delta$  7.42 – 7.37 (m, 2H), 7.25 – 7.17 (m, 4H), 6.99 – 6.94 (m, 2H), 6.85 – 6.77 (m, 2H), 3.87 – 3.76 (m, 4H), 2.88 (t, 2H), 1.21 (t,  $J$  = 7.1 Hz, 3H).

**<sup>13</sup>C NMR (100 MHz, CDCl<sub>3</sub>)**  $\delta$  156.2, 143.5, 136.5, 130.0, 128.6, 127.0, 125.8, 123.8, 49.9, 48.4, 34.9, 12.8.

**HRMS (ESI<sup>+</sup>):** exact mass calculated for [M+H]<sup>+</sup> (C<sub>17</sub>H<sub>19</sub>N<sub>5</sub>) requires  $m/z$  294.1713, found  $m/z$  294.1712.

**(5ca) N-benzyl-N-methyl-1-phenethyl-1H-tetrazol-5-amine**

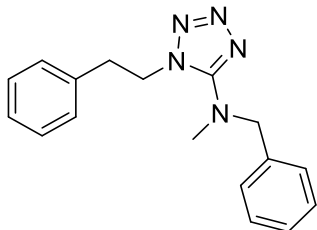

light yellow transparent liquid, 16.4 mg, 28%

**<sup>1</sup>H NMR (400 MHz, CDCl<sub>3</sub>)**  $\delta$  7.37 – 7.22 (m, 6H), 7.22 – 7.18 (m, 2H), 7.05 – 6.99 (m, 2H), 4.35 (t,  $J$  = 7.2 Hz, 2H), 4.27 (s, 2H), 3.21 (t,  $J$  = 7.2 Hz, 2H), 2.80 (s, 3H).

**<sup>13</sup>C NMR (100 MHz, CDCl<sub>3</sub>)**  $\delta$  159.6, 136.6, 136.1, 128.8, 128.8, 128.7, 127.8, 127.6, 127.2, 57.9, 48.5, 39.1, 35.6.

**HRMS (ESI<sup>+</sup>):** exact mass calculated for [M+H]<sup>+</sup> (C<sub>17</sub>H<sub>19</sub>N<sub>5</sub>) requires  $m/z$  294.1713, found  $m/z$

294.1716.

**(5da) N-(4-bromophenyl)-N-methyl-1-phenethyl-1H-tetrazol-5-amine**

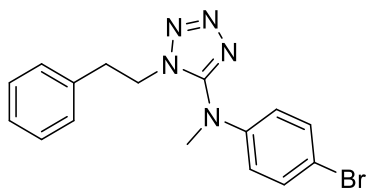

yellow liquid, 24.8 mg, 35%

**<sup>1</sup>H NMR (400 MHz, CDCl<sub>3</sub>)**  $\delta$  7.48 – 7.42 (m, 2H), 7.28 – 7.21 (m, 3H), 6.88 – 6.82 (m, 2H), 6.74 – 6.65 (m, 2H), 3.96 (t, *J* = 7.2 Hz, 2H), 3.23 (s, 3H), 2.98 (t, *J* = 7.2 Hz, 2H).

**<sup>13</sup>C NMR (100 MHz, CDCl<sub>3</sub>)**  $\delta$  156.6, 144.2, 136.3, 132.9, 128.7, 127.1, 122.7, 117.7, 48.6, 41.8, 35.2.

**HRMS (ESI<sup>+</sup>):** exact mass calculated for [M+H]<sup>+</sup> (C<sub>16</sub>H<sub>16</sub>BrN<sub>5</sub>) requires *m/z* 358.0662, found *m/z* 358.0661.

**(7aa) 1,5-diphenyl-1H-tetrazole**

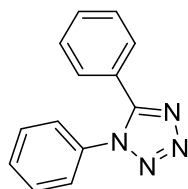

white crystal, 35.9 mg, 81%, m.p. 114-116 °C

**<sup>1</sup>H NMR (400 MHz, CDCl<sub>3</sub>)**  $\delta$  7.59 – 7.47 (m, 6H), 7.43 – 7.36 (m, 4H).

**<sup>13</sup>C NMR (100 MHz, CDCl<sub>3</sub>)**  $\delta$  153.5, 134.5, 131.2, 130.3, 129.8, 128.9, 128.8, 125.2, 123.5.

**HRMS (ESI<sup>+</sup>):** exact mass calculated for [M+H]<sup>+</sup> (C<sub>13</sub>H<sub>10</sub>N<sub>4</sub>) requires *m/z* 223.0978, found *m/z* 223.0978.

**(7ba) 5-(4-methoxyphenyl)-1-phenyl-1H-tetrazole**

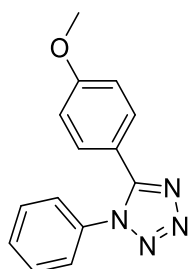

incarnadine solid, 44.8 mg, 89%, m.p. 98-99 °C

**<sup>1</sup>H NMR (400 MHz, CDCl<sub>3</sub>)**  $\delta$  7.58 – 7.48 (m, 5H), 7.43 – 7.38 (m, 2H), 6.92 – 6.87 (m, 2H), 3.83 (s, 3H).

**<sup>13</sup>C NMR (100 MHz, CDCl<sub>3</sub>)**  $\delta$  161.8, 153.4, 134.7, 130.4, 129.8, 125.3, 115.6, 114.4, 55.4.

**HRMS (ESI<sup>+</sup>):** exact mass calculated for [M+H]<sup>+</sup> (C<sub>14</sub>H<sub>12</sub>N<sub>4</sub>) requires *m/z* 253.1089, found *m/z* 253.1089.

**(7ca) 1-phenyl-5-(p-tolyl)-1H-tetrazole**

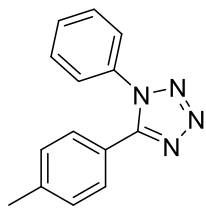

white crystal, 27.8 mg, 59%, m.p. 126-128 °C

**<sup>1</sup>H NMR (400 MHz, CDCl<sub>3</sub>)** δ 7.58 – 7.50 (m, 3H), 7.46 – 7.38 (m, 4H), 7.20 (d, *J* = 8.0 Hz, 2H), 2.38 (s, 3H).

**<sup>13</sup>C NMR (100 MHz, CDCl<sub>3</sub>)** δ 153.6, 141.7, 134.7, 130.3, 129.8, 129.6, 128.8, 125.3, 120.6, 21.4.

**HRMS (ESI<sup>+</sup>):** exact mass calculated for [M+H]<sup>+</sup> (C<sub>14</sub>H<sub>12</sub>N<sub>4</sub>) requires *m/z* 237.1135, found *m/z* 237.1136.

**(7da) 1-phenyl-5-(m-tolyl)-1H-tetrazole**

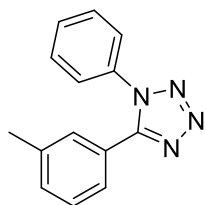

light yellow crystal, 33.5 mg, 71%, m.p. 115-117°C

**<sup>1</sup>H NMR (400 MHz, CDCl<sub>3</sub>)** δ 7.59 – 7.50 (m, 3H), 7.49 – 7.47 (m, 1H), 7.43 – 7.37 (m, 2H), 7.32 – 7.20 (m, 3H), 2.33 (s, 3H).

**<sup>13</sup>C NMR (100 MHz, CDCl<sub>3</sub>)** δ 153.7, 139.0, 134.6, 132.0, 130.3, 129.8, 129.6, 128.7, 125.8, 125.23, 123.4, 21.2.

**HRMS (ESI<sup>+</sup>):** exact mass calculated for [M+H]<sup>+</sup> (C<sub>14</sub>H<sub>12</sub>N<sub>4</sub>) requires *m/z* 237.1135, found *m/z* 237.1137.

**(7ea) 5-(4-fluorophenyl)-1-phenyl-1H-tetrazole**

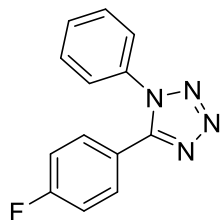

white crystal, 36.4 mg, 76%, m.p. 115-117 °C

**<sup>1</sup>H NMR (400 MHz, CDCl<sub>3</sub>)** δ 7.61 – 7.52 (m, 5H), 7.43 – 7.38 (m, 2H), 7.14 – 7.07 (m, 2H).

**<sup>13</sup>C NMR (100 MHz, CDCl<sub>3</sub>)** δ 164.3 (d, *J* = 253.0 Hz), 152.8, 134.4, 131.1, 131.1, 130.5, 130.0, 125.3, 119.8, 119.7 (d, *J* = 3.0 Hz), 116.3 (d, *J* = 22.0 Hz).

**HRMS (ESI<sup>+</sup>):** exact mass calculated for [M+H]<sup>+</sup> (C<sub>13</sub>H<sub>9</sub>FN<sub>4</sub>) requires *m/z* 241.0884, found *m/z* 241.0883.

**(7fa) 5-(4-chlorophenyl)-1-phenyl-1H-tetrazole**

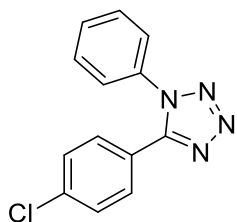

white crystal, 36.3 mg, 71%, m.p. 151-153 °C

**<sup>1</sup>H NMR (400 MHz, CDCl<sub>3</sub>)** δ 7.60 – 7.49 (m, 5H), 7.43 – 7.36 (m, 4H).

**<sup>13</sup>C NMR (100 MHz, CDCl<sub>3</sub>)** δ 152.7, 137.7, 134.3, 130.6, 130.1, 130.0, 129.4, 125.3, 122.0.

**HRMS (ESI<sup>+</sup>):** exact mass calculated for [M+H]<sup>+</sup> (C<sub>13</sub>H<sub>9</sub>ClN<sub>4</sub>) requires *m/z* 257.0589, found *m/z* 257.0591.

**(7ga) 5-(4-bromophenyl)-1-phenyl-1H-tetrazole**

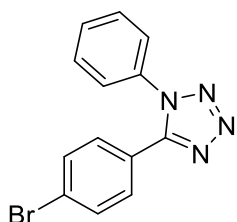

white crystal, 30.0 mg, 50%, m.p. 160-162 °C

**<sup>1</sup>H NMR (400 MHz, CDCl<sub>3</sub>)** δ 7.60 – 7.52 (m, 5H), 7.46 – 7.41 (m, 2H), 7.41 – 7.38 (m, 2H).

**<sup>13</sup>C NMR (100 MHz, CDCl<sub>3</sub>)** δ 152.8, 134.3, 132.3, 130.6, 130.3, 130.0, 126.1, 125.3, 122.5.

**HRMS (ESI<sup>+</sup>):** exact mass calculated for [M+H]<sup>+</sup> (C<sub>13</sub>H<sub>9</sub>BrN<sub>4</sub>) requires *m/z* 301.0083, found *m/z* 301.0088.

**(7ha) methyl 4-(1-phenyl-1H-tetrazol-5-yl)benzoate**

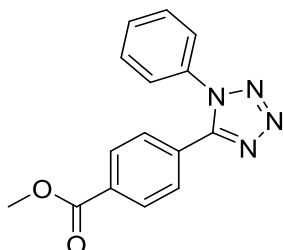

light yellow powder, 43.1 mg, 77%, m.p. 140-142 °C

**<sup>1</sup>H NMR (400 MHz, CDCl<sub>3</sub>)** δ 8.10 – 8.04 (m, 2H), 7.68 – 7.63 (m, 2H), 7.62 – 7.52 (m, 3H), 7.43 – 7.36 (m, 2H), 3.93 (s, 3H).

**<sup>13</sup>C NMR (100 MHz, CDCl<sub>3</sub>)** δ 165.9, 152.8, 134.2, 132.5, 130.6, 130.1, 130.0, 128.9, 127.6, 52.4.

**HRMS (ESI<sup>+</sup>):** exact mass calculated for [M+H]<sup>+</sup> (C<sub>15</sub>H<sub>12</sub>N<sub>4</sub>O<sub>2</sub>) requires *m/z* 281.1033, found *m/z* 281.1035.

**(7ia) 1-phenyl-5-(4-(trifluoromethyl)phenyl)-1H-tetrazole**

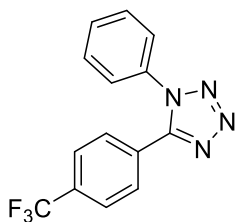

light yellow crystal, 39.4 mg, 68%, m.p. 64-66 °C

**<sup>1</sup>H NMR (400 MHz, CDCl<sub>3</sub>)** δ 7.73 – 7.66 (m, 4H), 7.62 – 7.54 (m, 3H), 7.43 – 7.38 (m, 2H).

**<sup>13</sup>C NMR (100 MHz, CDCl<sub>3</sub>)** δ 152.5, 134.2, 133.1 (q, *J* = 33.3 Hz), 130.8, 130.1, 129.3, 127.1, 126.4 – 125.7 (q, *J* = 4 Hz), 125.3, 123.4 (q, *J* = 272.8 Hz).

**HRMS (ESI<sup>+</sup>):** exact mass calculated for [M+H]<sup>+</sup> (C<sub>14</sub>H<sub>9</sub>F<sub>3</sub>N<sub>4</sub>) requires *m/z* 291.0852, found *m/z* 291.0854.

**(7ja) 5-(4-nitrophenyl)-1-phenyl-1H-tetrazole**

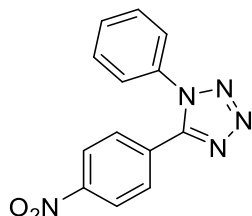

yellow crystal, 37.9 mg, 71%, m.p. 162-164 °C

**<sup>1</sup>H NMR (400 MHz, CDCl<sub>3</sub>)** δ 8.29 – 8.25 (m, 2H), 7.81 – 7.76 (m, 2H), 7.65 – 7.56 (m, 3H), 7.43 – 7.39 (m, 2H).

**<sup>13</sup>C NMR (100 MHz, CDCl<sub>3</sub>)** δ 151.9, 149.3, 134.0, 131.1, 130.3, 130.0, 129.6, 125.3, 124.1.

**HRMS (ESI<sup>+</sup>):** exact mass calculated for [M+H]<sup>+</sup> (C<sub>13</sub>H<sub>9</sub>N<sub>5</sub>O<sub>2</sub>) requires *m/z* 268.0829, found *m/z* 268.0839.

**(7ka) 5-(naphthalen-2-yl)-1-phenyl-1H-tetrazole**

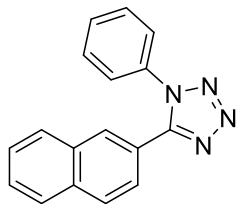

light brown-yellow solid, 36.9 mg, 68%, m.p. 111-112 °C

**<sup>1</sup>H NMR (400 MHz, CDCl<sub>3</sub>)** δ 8.15 – 8.12 (m, 1H), 7.87 – 7.82 (m, 2H), 7.80 – 7.76 (m, 1H), 7.61 – 7.50 (m, 6H), 7.46 – 7.42 (m, 2H).

**<sup>13</sup>C NMR (100 MHz, CDCl<sub>3</sub>)** δ 153.7, 134.6, 134.1, 132.7, 130.4, 129.9, 129.7, 128.8, 128.7, 128.1, 127.8, 127.1, 125.3, 124.8, 120.8.

**HRMS (ESI<sup>+</sup>):** exact mass calculated for [M+H]<sup>+</sup> (C<sub>17</sub>H<sub>12</sub>N<sub>4</sub>) requires *m/z* 273.1135, found *m/z* 273.1140.

**(7la) 5-(furan-2-yl)-1-phenyl-1H-tetrazole**

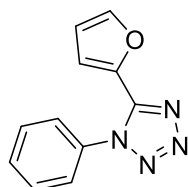

brown crystal, 35.1 mg, 83%, m.p. 100-101 °C

**<sup>1</sup>H NMR (400 MHz, CDCl<sub>3</sub>)** δ 7.64 – 7.57 (m, 3H), 7.54 – 7.53 (m, 1H), 6.84 – 6.82 (m, 1H), 6.53 – 6.50 (m, 1H).

**<sup>13</sup>C NMR (100 MHz, CDCl<sub>3</sub>)** δ 146.5, 145.7, 138.9, 134.2, 130.8, 129.6, 125.8, 115.1, 112.0.

**HRMS (ESI<sup>+</sup>):** exact mass calculated for [M+H]<sup>+</sup> (C<sub>11</sub>H<sub>8</sub>N<sub>4</sub>O) requires *m/z* 213.0771, found *m/z* 213.0775.

**(7ma) 1-phenyl-5-(thiophen-2-yl)-1H-tetrazole**

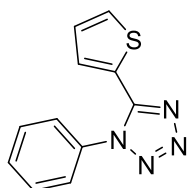

gray-white crystal, 40.1 mg, 88%, m.p. 82-84 °C

**<sup>1</sup>H NMR (400 MHz, CDCl<sub>3</sub>)**  $\delta$  7.68 – 7.59 (m, 3H), 7.54 – 7.45 (m, 3H), 7.28 – 7.23 (m, 1H), 7.08 – 7.02 (m, 1H).

**<sup>13</sup>C NMR (100 MHz, CDCl<sub>3</sub>)**  $\delta$  149.8, 134.0, 131.2, 130.5, 130.0, 128.0, 126.3, 124.2.

**HRMS (ESI<sup>+</sup>):** exact mass calculated for [M+H]<sup>+</sup> (C<sub>11</sub>H<sub>8</sub>N<sub>4</sub>S) requires *m/z* 229.0542, found *m/z* 229.0546.

**(7na) (E)-1-phenyl-5-styryl-1H-tetrazole**

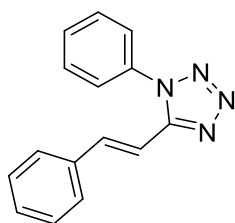

orange crystal, 35.2 mg, 71%, m.p. 160-162 °C

**<sup>1</sup>H NMR (400 MHz, CDCl<sub>3</sub>)**  $\delta$  7.98 (d, *J* = 16.4 Hz, 1H), 7.67 – 7.60 (m, 3H), 7.56 – 7.47 (m, 4H), 7.41 – 7.36 (m, 3H), 6.81 (d, *J* = 16.4 Hz, 1H).

**<sup>13</sup>C NMR (100 MHz, CDCl<sub>3</sub>)**  $\delta$  152.2, 141.2, 134.6, 133.7, 130.4, 130.0, 128.9, 127.6, 125.1, 107.4.

**HRMS (ESI<sup>+</sup>):** exact mass calculated for [M+H]<sup>+</sup> (C<sub>15</sub>H<sub>12</sub>N<sub>4</sub>) requires *m/z* 249.1135, found *m/z* 249.1138.

**(7oa) 5-(chloromethyl)-1-phenyl-1H-tetrazole**

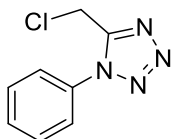

yellow liquid, 26.3 mg, 68%

**<sup>1</sup>H NMR (400 MHz, CDCl<sub>3</sub>)**  $\delta$  7.67 – 7.62 (m, 3H), 7.62 – 7.58 (m, 2H), 4.80 (s, 2H).

**<sup>13</sup>C NMR (100 MHz, CDCl<sub>3</sub>)**  $\delta$  151.4, 133.2, 131.0, 130.1, 124.6, 31.1.

**HRMS (ESI<sup>+</sup>):** exact mass calculated for [M+H]<sup>+</sup> (C<sub>8</sub>H<sub>7</sub>ClN<sub>4</sub>) requires *m/z* 195.0432, found *m/z* 195.0433.

**(7pa) 5-(1-chloropropyl)-1-phenyl-1H-tetrazole**

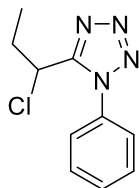

transparent liquid, 31.0 mg, 70%

**<sup>1</sup>H NMR (400 MHz, CDCl<sub>3</sub>)**  $\delta$  7.67 – 7.59 (m, 3H), 7.59 – 7.53 (m, 2H), 4.85 (t, *J* = 7.2 Hz, 1H), 2.44 – 2.35 (m, 2H), 1.06 (t, *J* = 7.2 Hz, 3H).

**<sup>13</sup>C NMR (100 MHz, CDCl<sub>3</sub>)** δ 154.6, 133.3, 131.0, 130.0, 125.3, 49.8, 29.5, 11.2.

**HRMS (ESI<sup>+</sup>):** exact mass calculated for [M+H]<sup>+</sup> (C<sub>10</sub>H<sub>11</sub>ClN<sub>4</sub>) requires *m/z* 223.0475, found *m/z* 223.0476.

**(7qa) 5-(3-chloropropyl)-1-phenyl-1H-tetrazole**

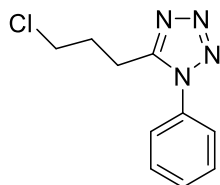

light yellow liquid, 32.4 mg, 73%

**<sup>1</sup>H NMR (400 MHz, CDCl<sub>3</sub>)** δ 7.67 – 7.57 (m, 3H), 7.52 – 7.41 (m, 2H), 3.68 (t, *J* = 6.0 Hz, 2H), 3.08 (t, *J* = 7.2 Hz, 2H), 2.40 – 2.30 (m, 2H).

**<sup>13</sup>C NMR (100 MHz, CDCl<sub>3</sub>)** δ 153.9, 133.5, 130.5, 129.9, 124.8, 43.5, 29.2, 20.9.

**HRMS (ESI<sup>+</sup>):** exact mass calculated for [M+H]<sup>+</sup> (C<sub>10</sub>H<sub>11</sub>ClN<sub>4</sub>) requires *m/z* 223.0475, found *m/z* 223.0476.

**(7ra) 1-phenyl-5-(thiophen-2-ylmethyl)-1H-tetrazole**

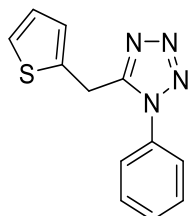

brown solid, 35.3 mg, 73%, m.p. 118-119°C

**<sup>1</sup>H NMR (400 MHz, CDCl<sub>3</sub>)** δ 7.61 – 7.51 (m, 3H), 7.38 – 7.33 (m, 2H), 7.17 (dd, *J* = 5.2, 1.2 Hz, 1H), 6.88 (dd, *J* = 5.2, 3.6 Hz, 1H), 6.75 (dd, *J* = 3.6, 0.8 Hz, 1H), 4.47 (s, 2H).

**<sup>13</sup>C NMR (100 MHz, CDCl<sub>3</sub>)** δ 153.3, 135.5, 133.5, 130.6, 129.8, 127.1, 126.8, 125.4, 125.1, 24.2.

**HRMS (ESI<sup>+</sup>):** exact mass calculated for [M+H]<sup>+</sup> (C<sub>12</sub>H<sub>10</sub>N<sub>4</sub>S) requires *m/z* 243.0699, found *m/z* 243.0699.

**(7sa) 8-(5-ethyl-1H-tetrazol-1-yl)quinoline**

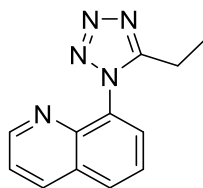

brown-red crystal, 17.1 mg, 38%, m.p. 140-141°C

**<sup>1</sup>H NMR (400 MHz, CDCl<sub>3</sub>)** δ 8.89 (dd, *J* = 4.0, 1.6 Hz, 1H), 8.32 (dd, *J* = 8.4, 1.6 Hz, 1H), 8.10 (dd, *J* = 8.4, 1.2 Hz, 1H), 7.86 (dd, *J* = 7.2, 1.2 Hz, 1H), 7.77 – 7.71 (m, 1H), 7.55 (dd, *J* = 8.4, 4.4 Hz, 1H), 2.76 (q, *J* = 7.6 Hz, 2H), 1.31 (t, *J* = 7.6 Hz, 3H).

**<sup>13</sup>C NMR (100 MHz, CDCl<sub>3</sub>)** δ 158.2, 151.9, 142.5, 136.2, 131.3, 131.1, 129.0, 128.1, 126.0, 122.60, 17.6, 11.3.

**HRMS (ESI<sup>+</sup>):** exact mass calculated for [M+H]<sup>+</sup> (C<sub>12</sub>H<sub>11</sub>N<sub>5</sub>) requires *m/z* 226.1087, found *m/z* 226.1091.



## Copies of NMR Spectra

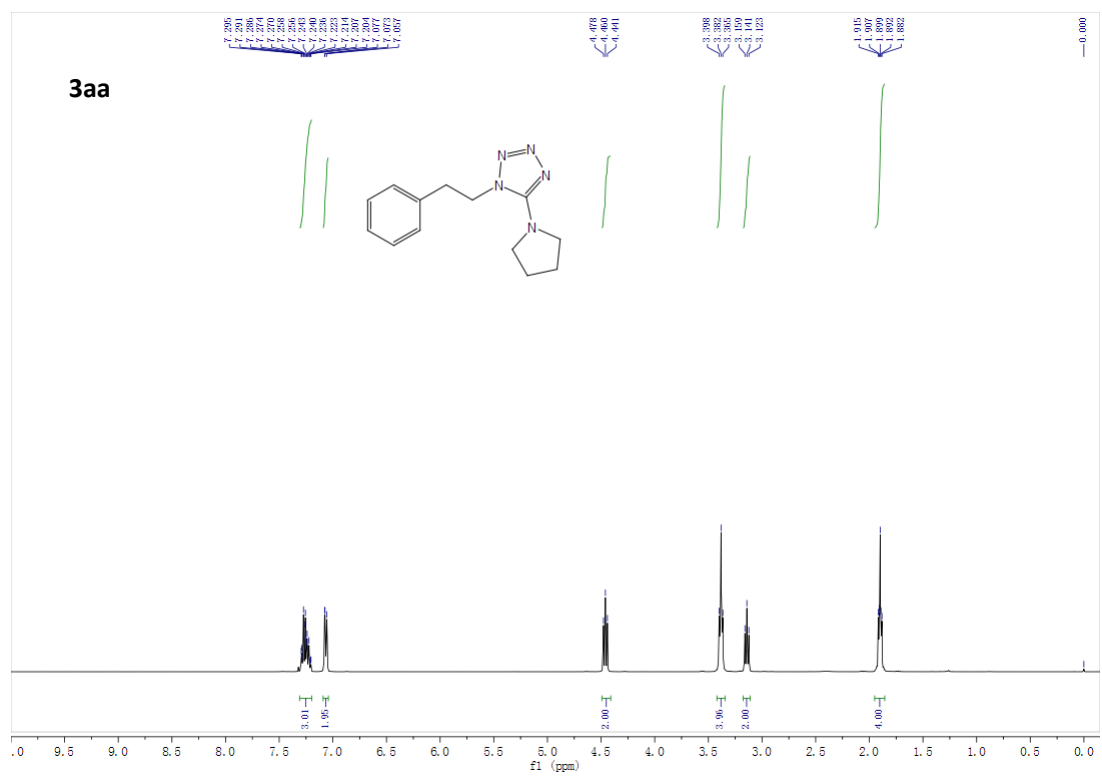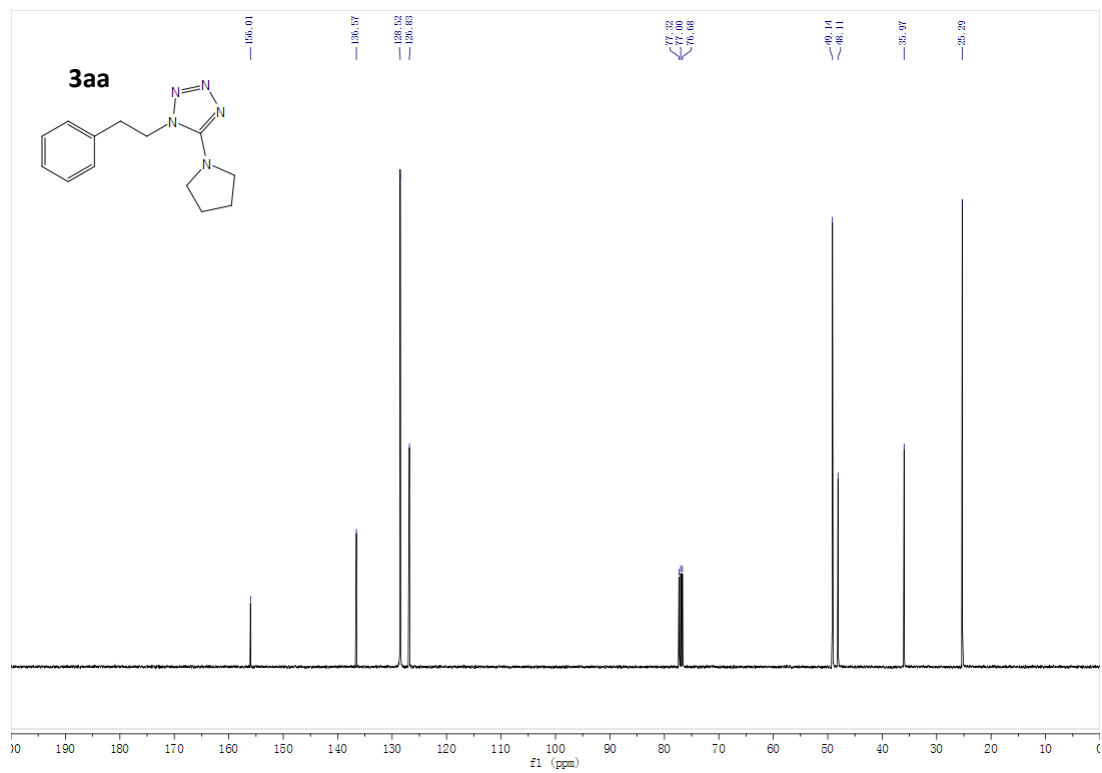

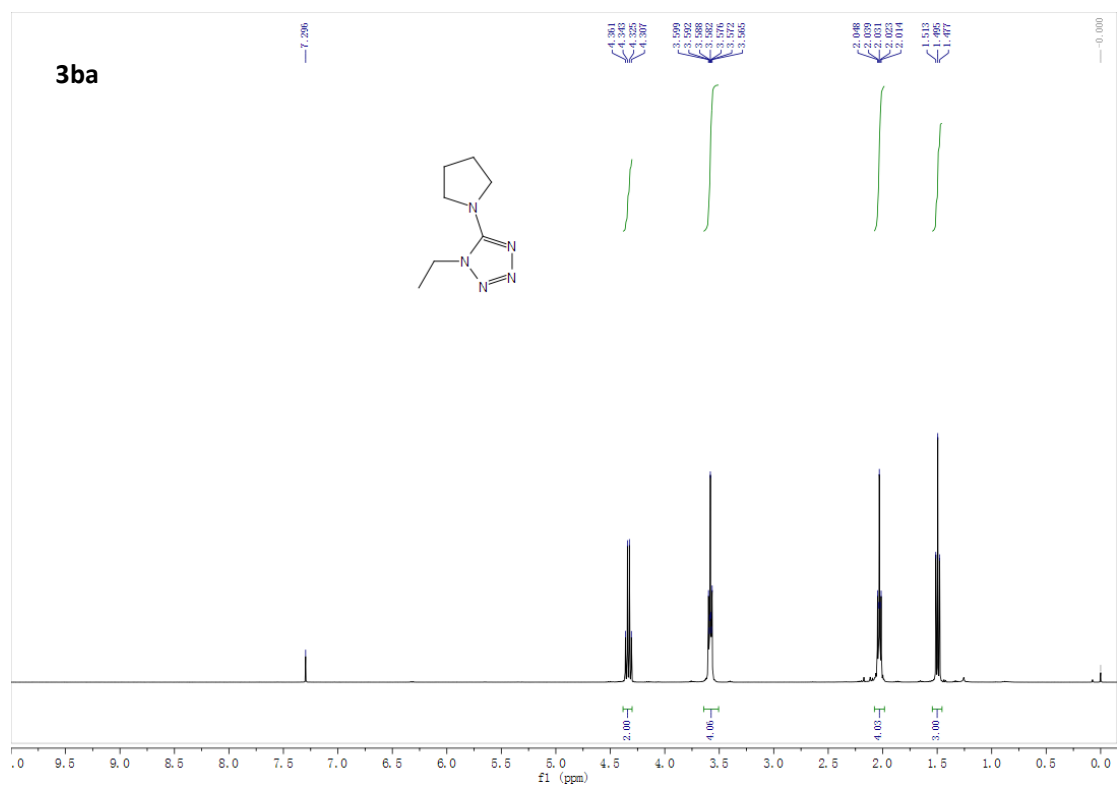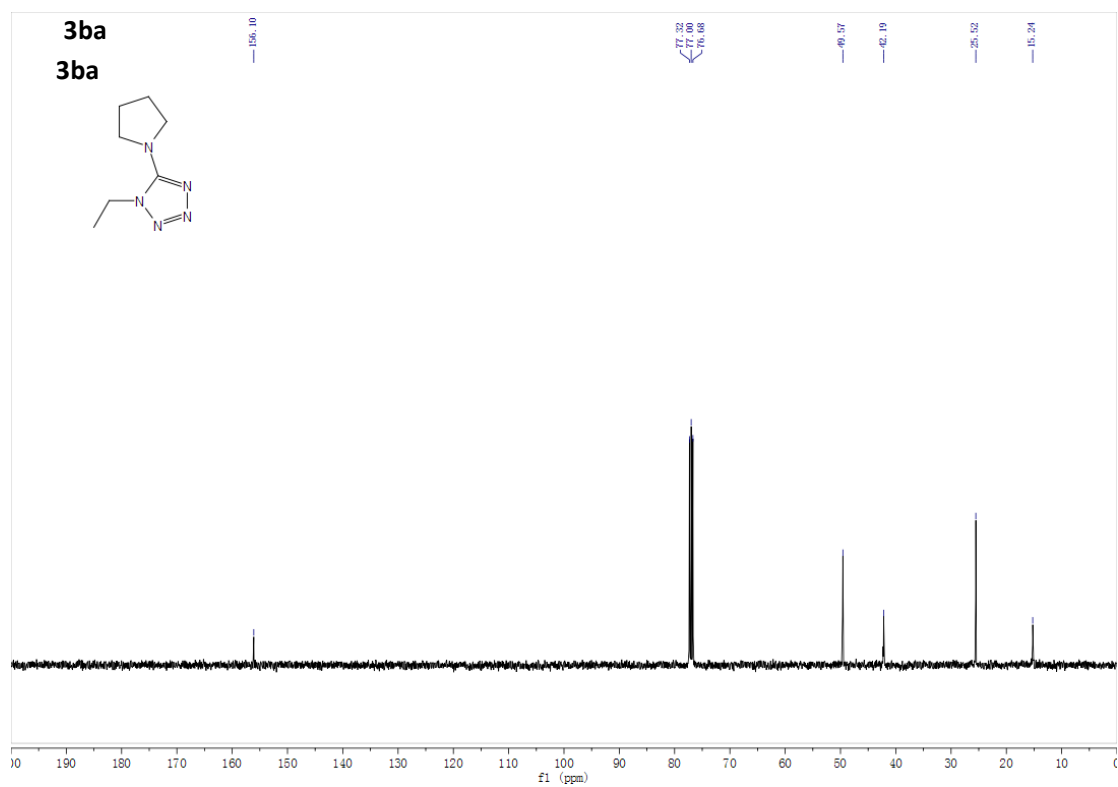

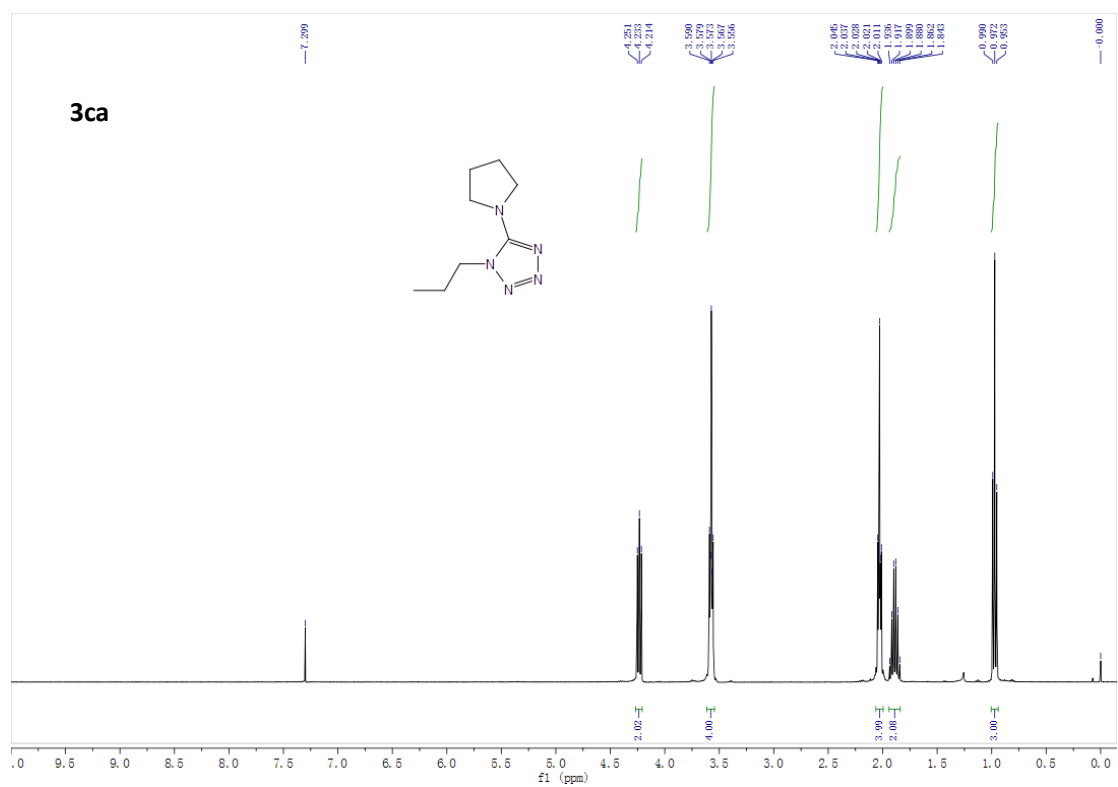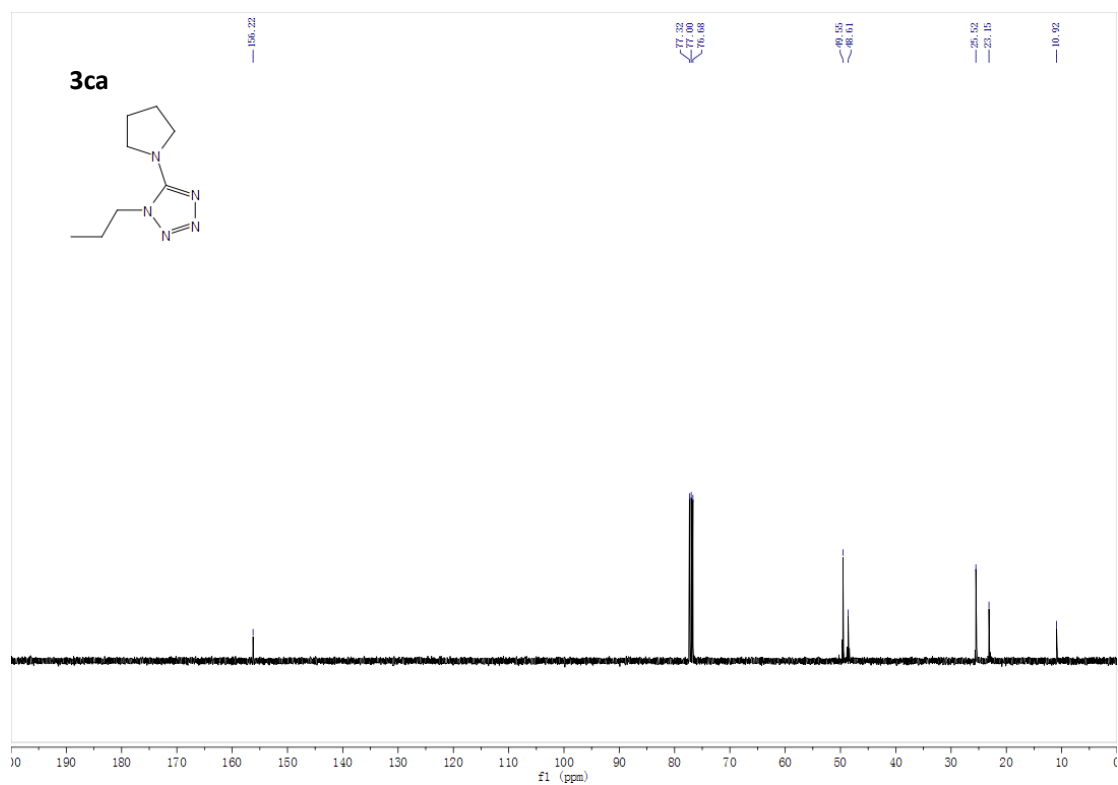

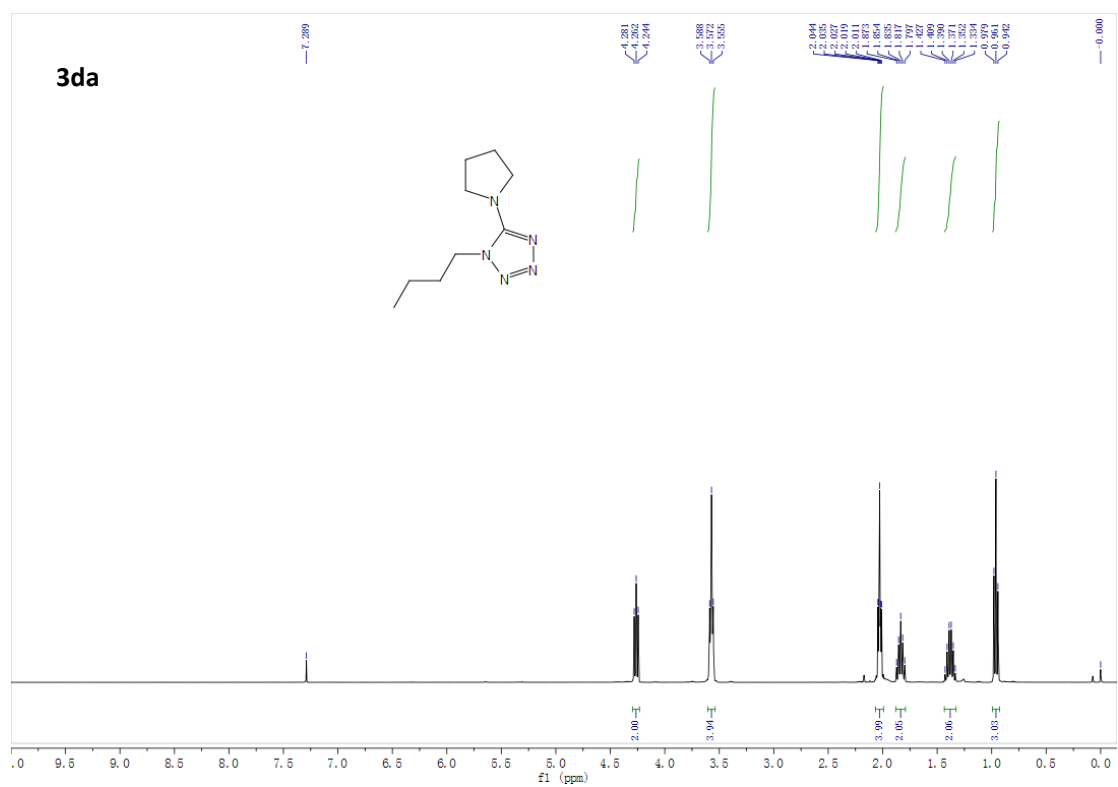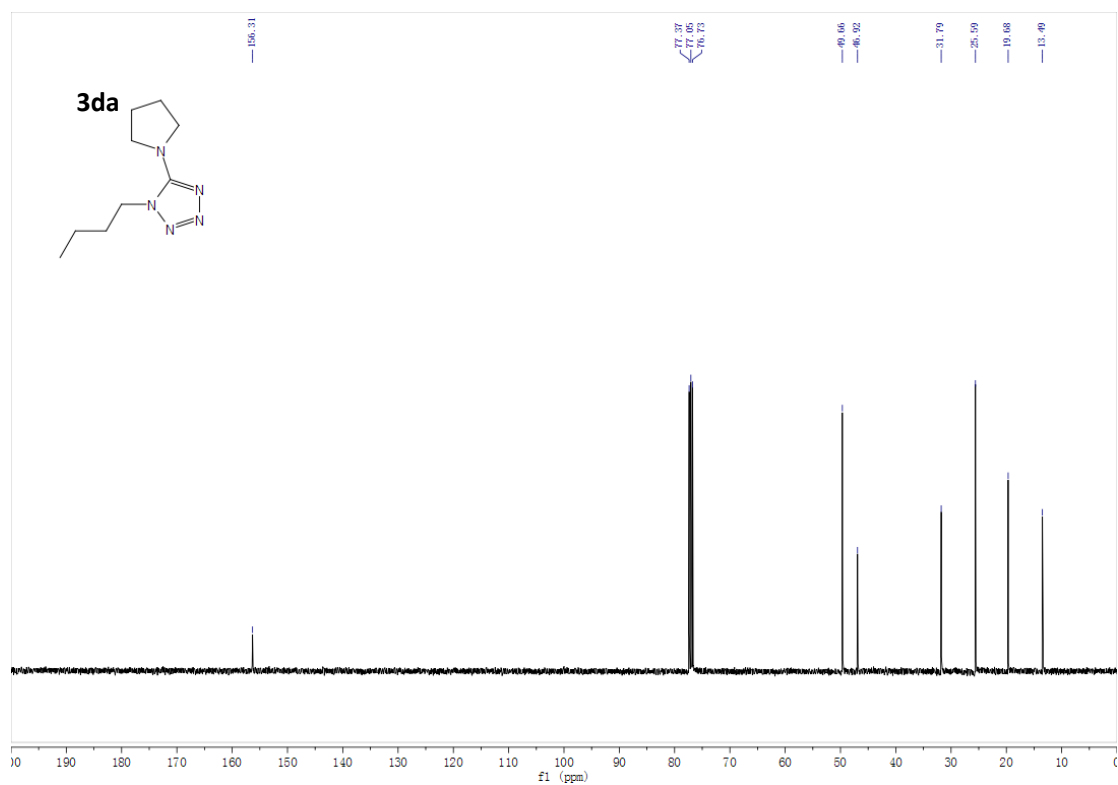

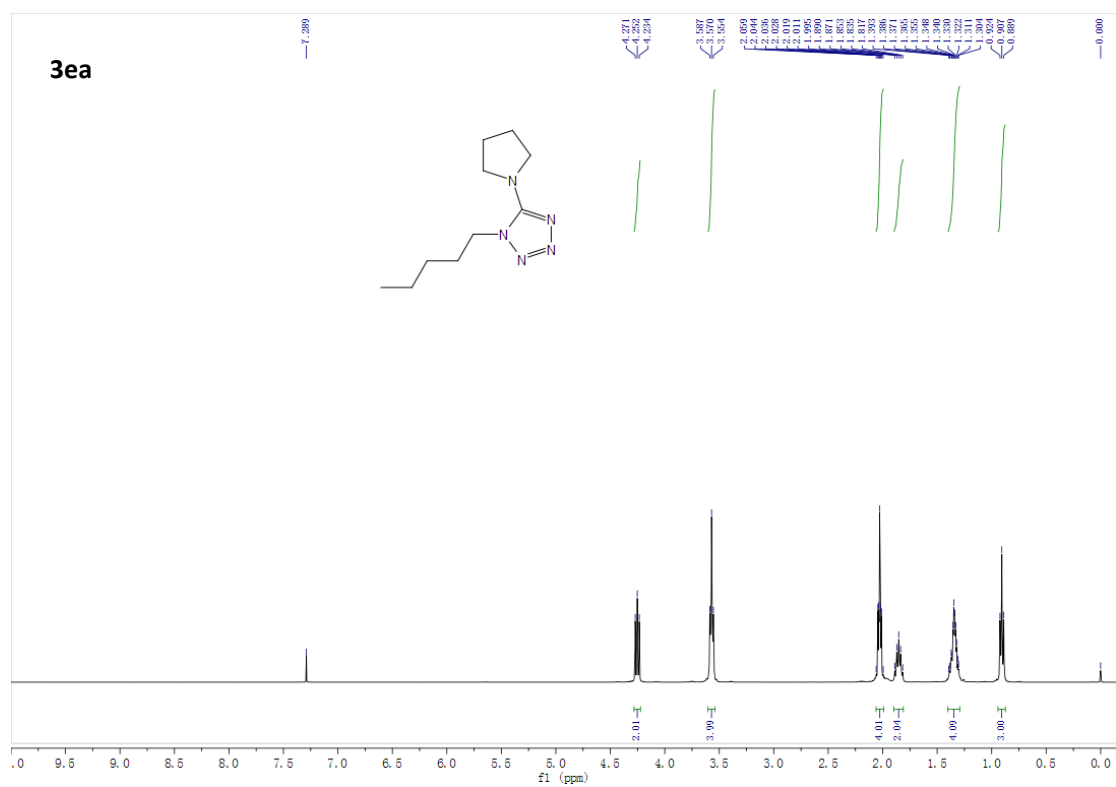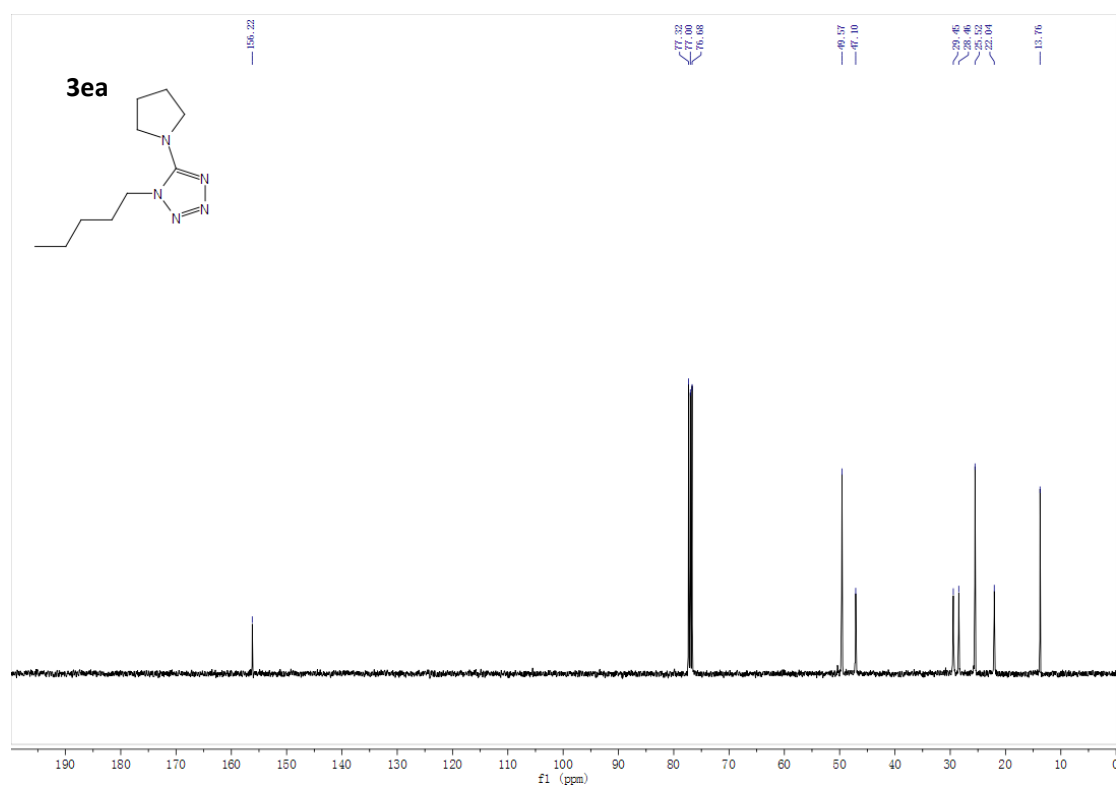

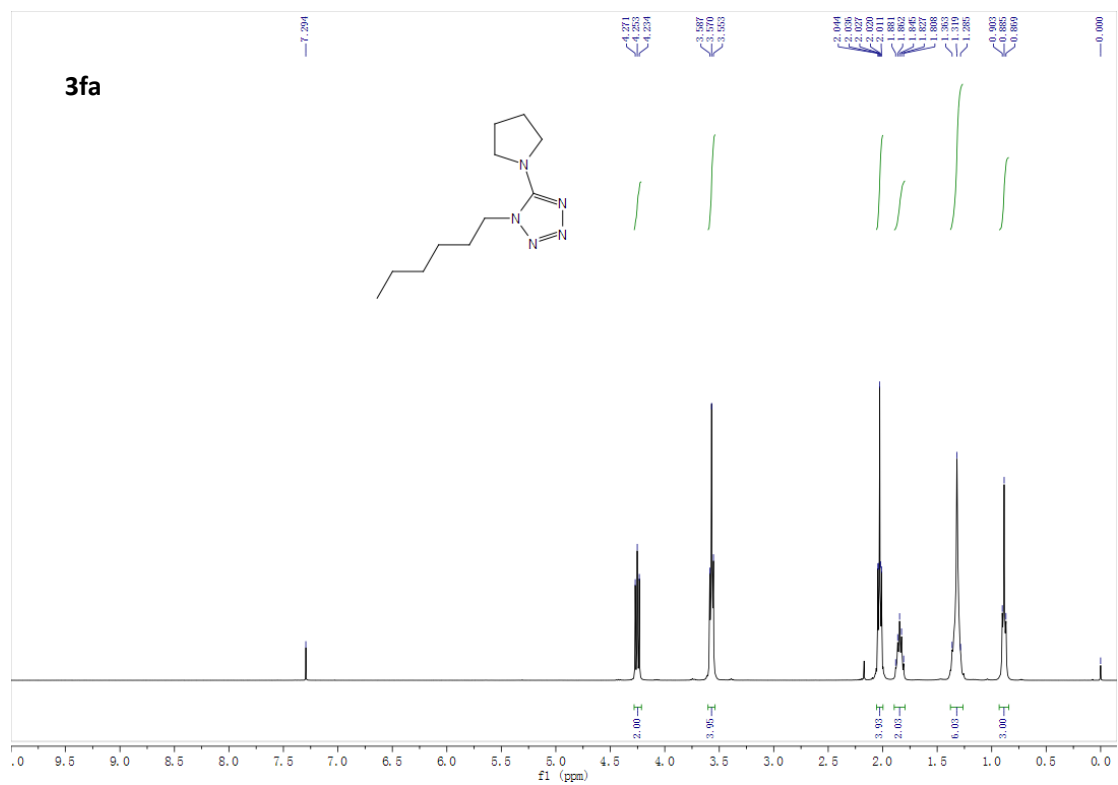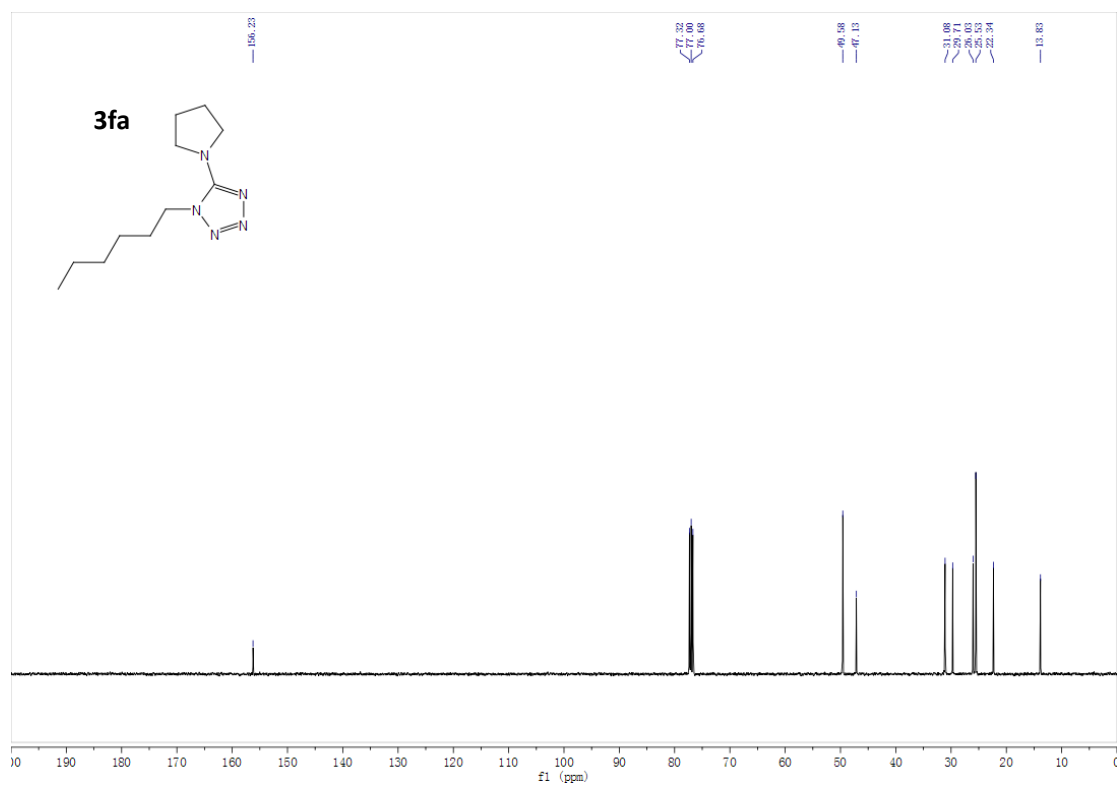

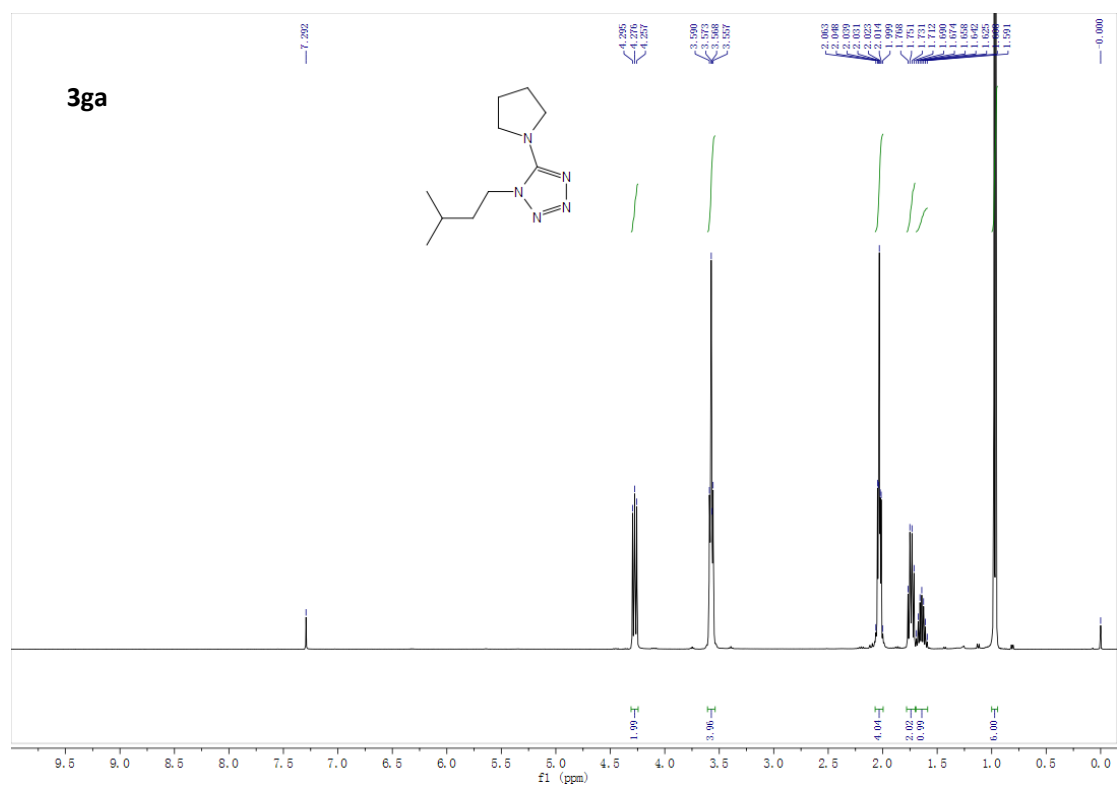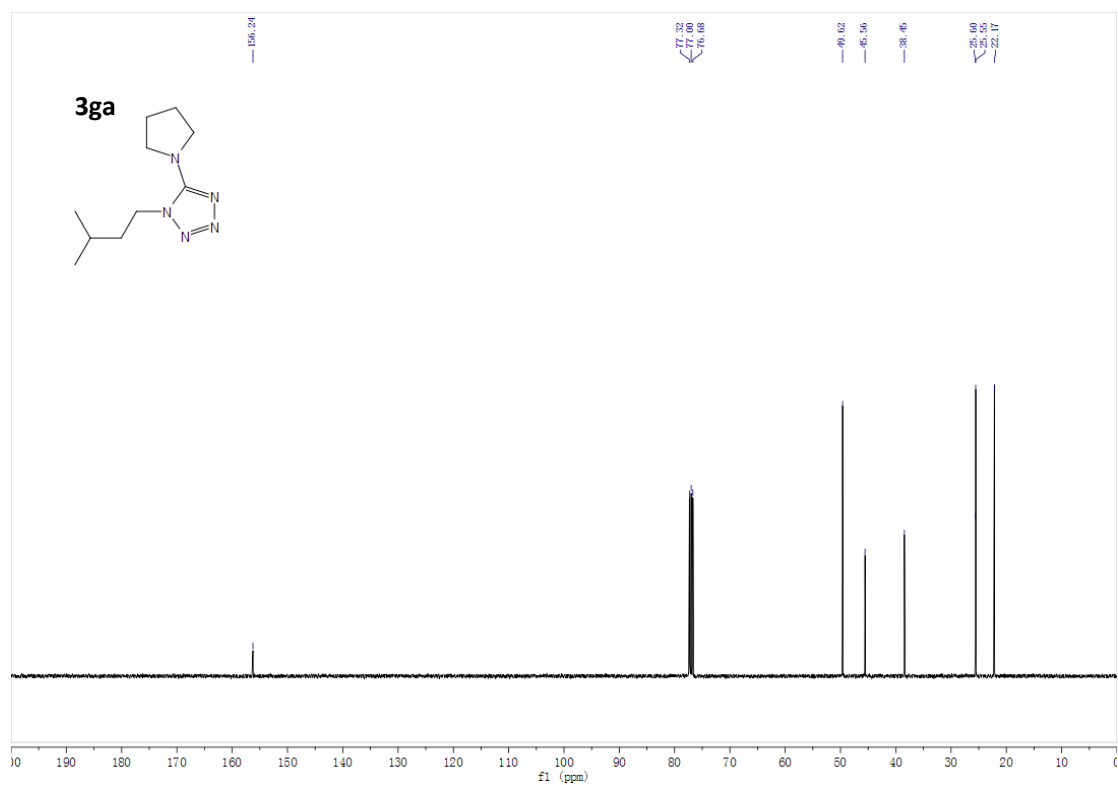

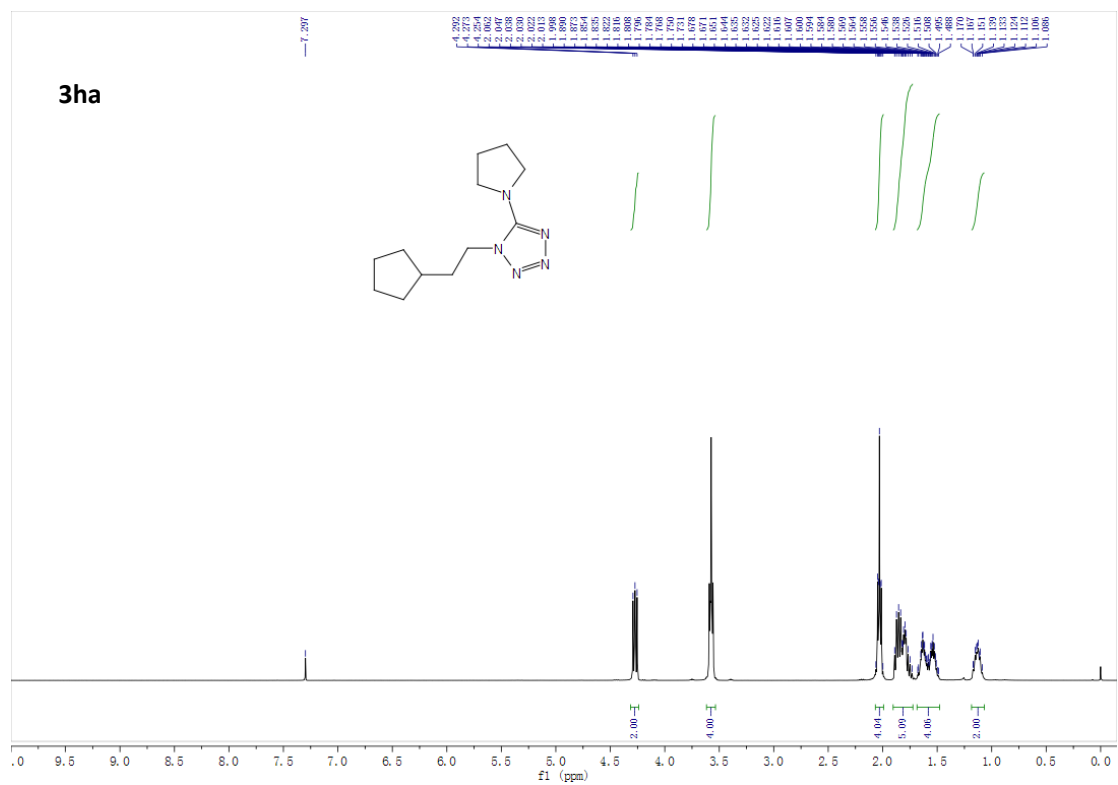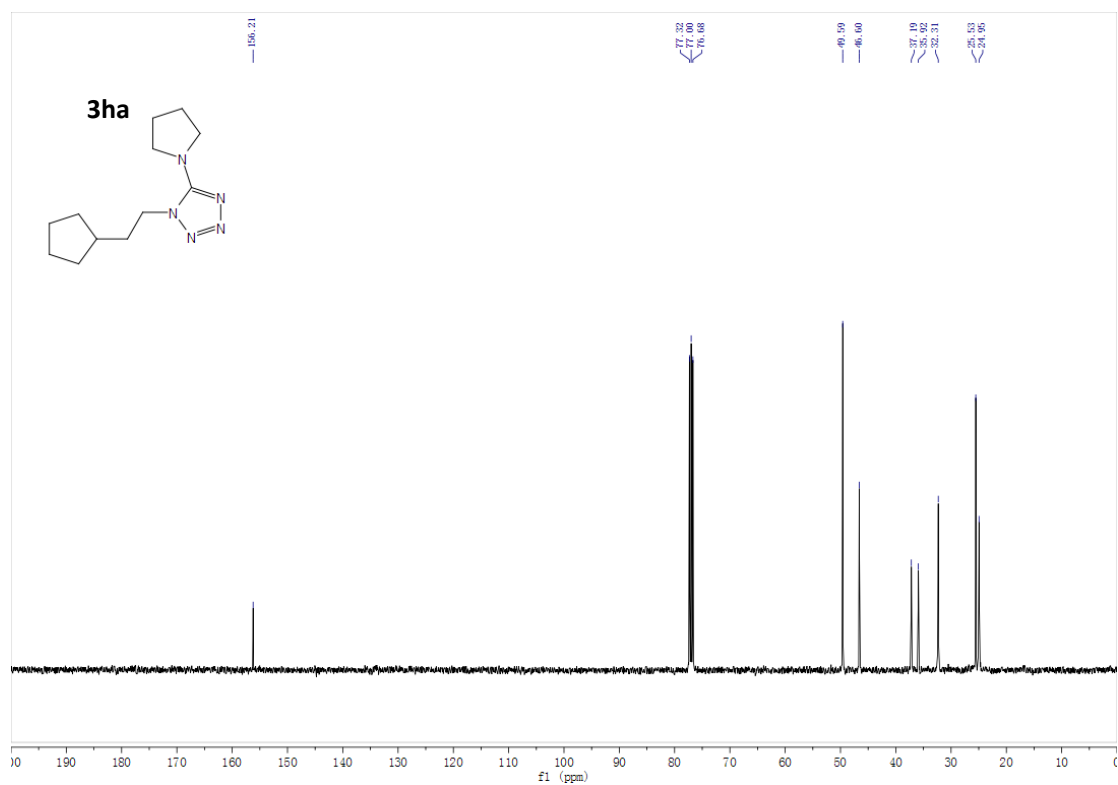



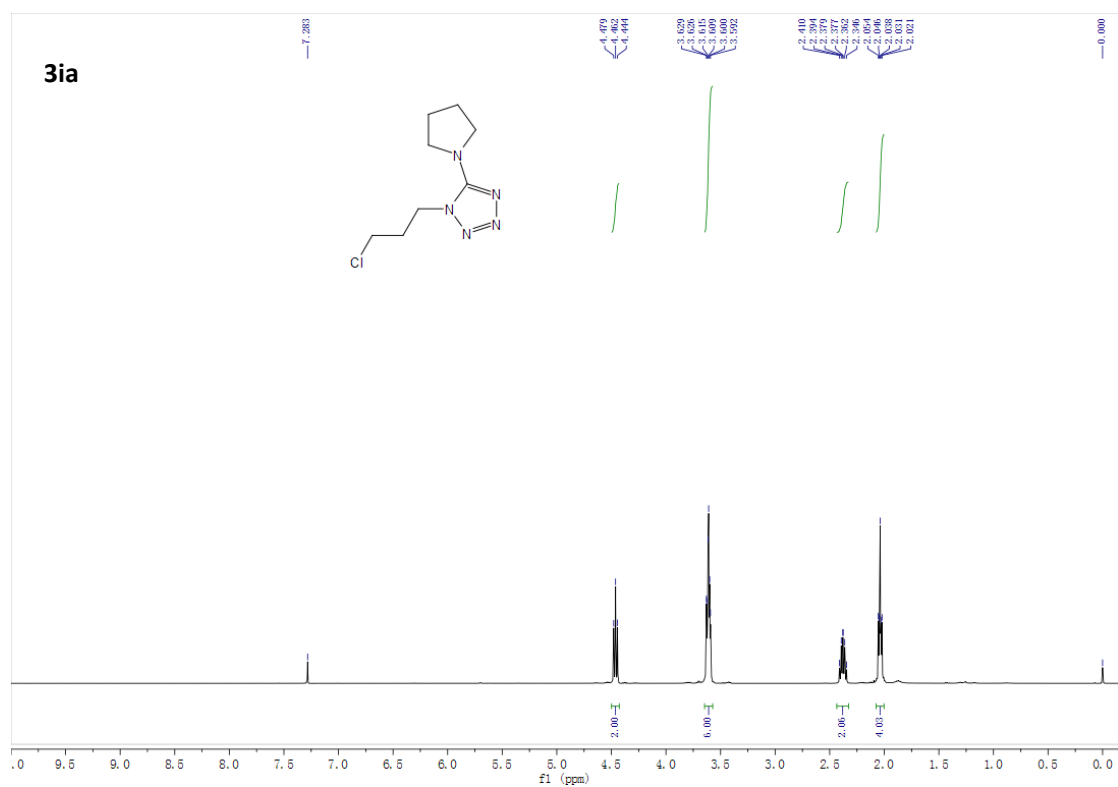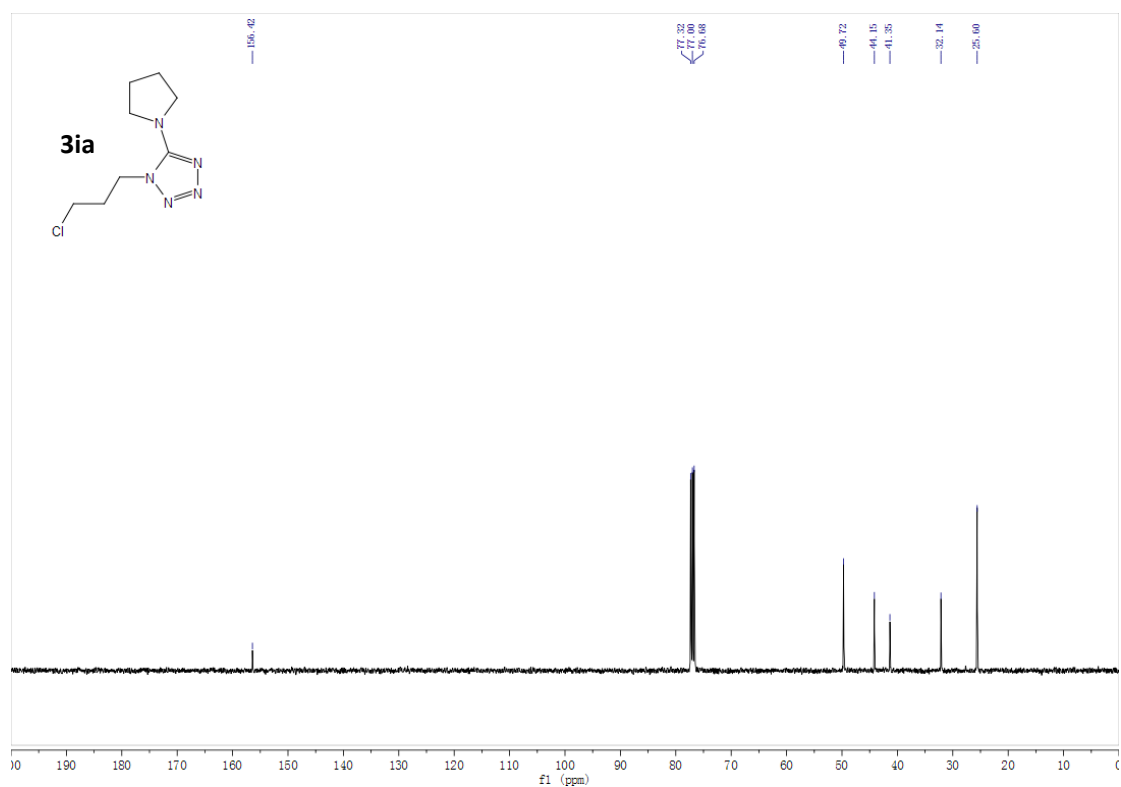

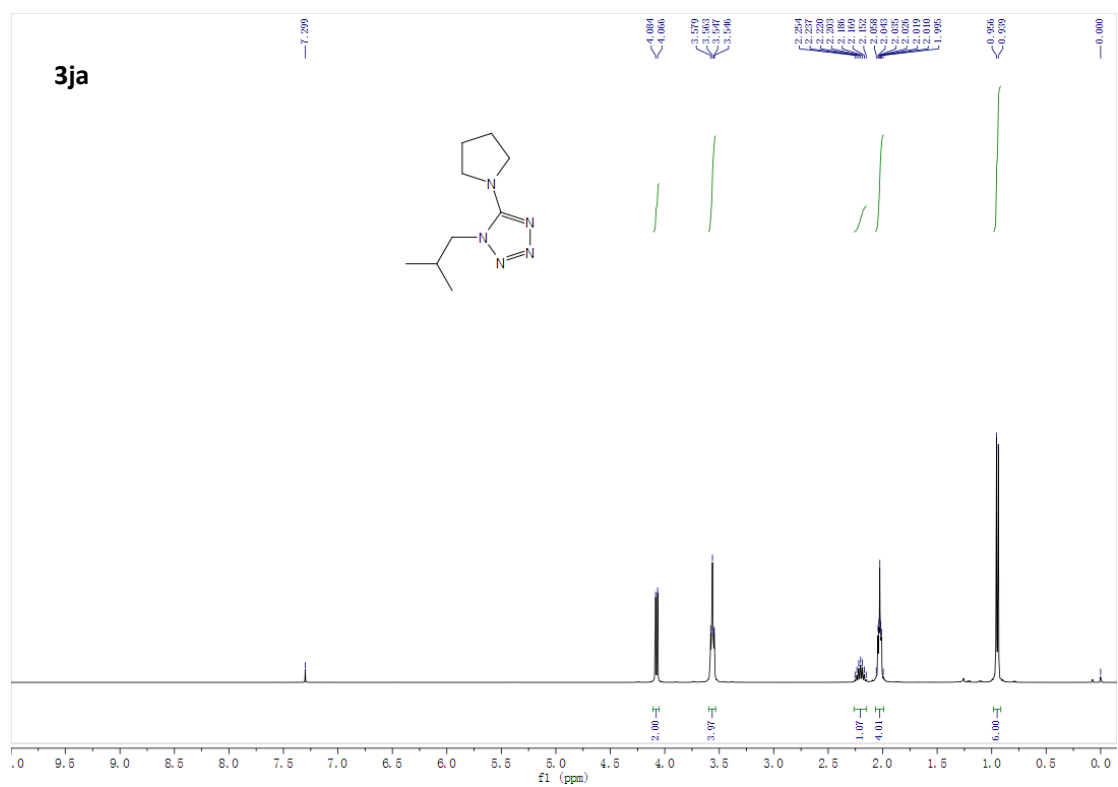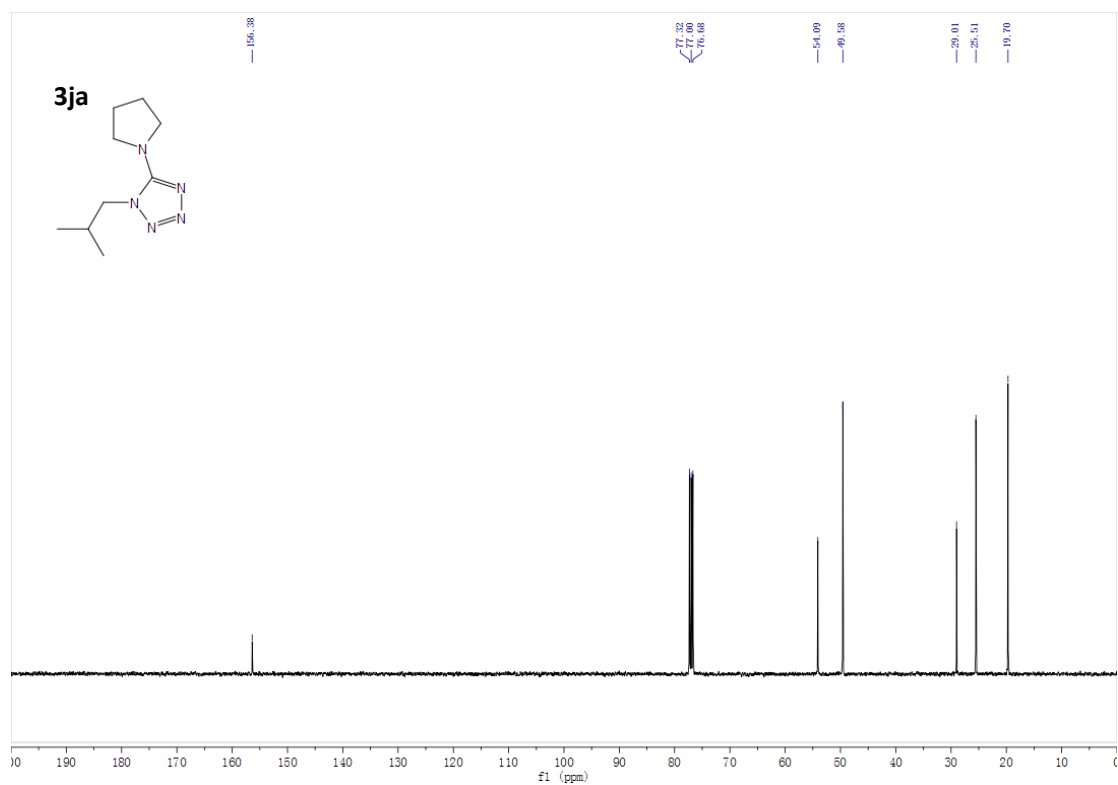

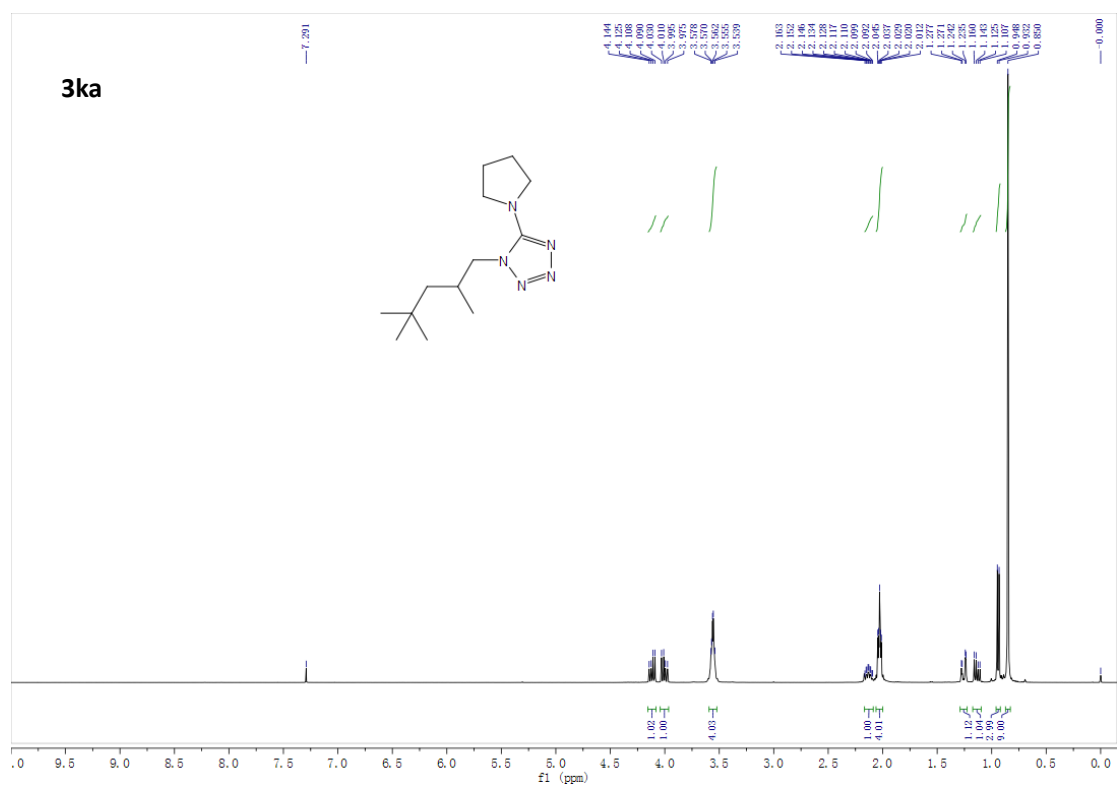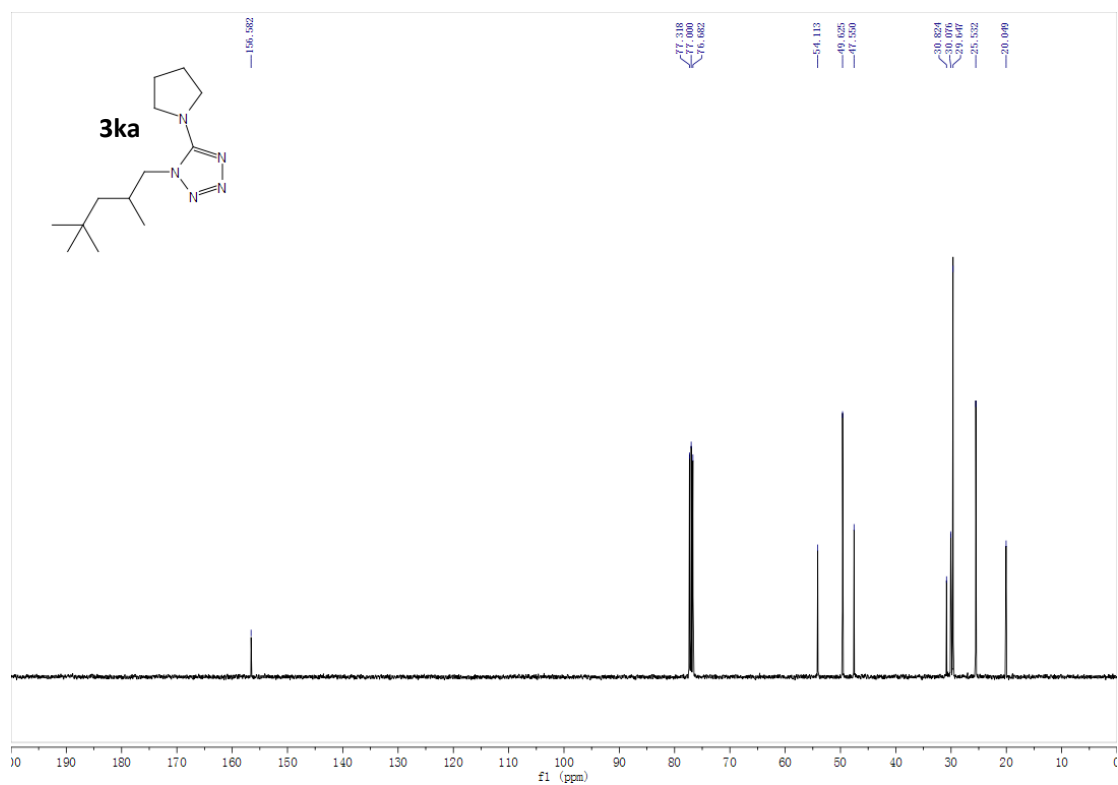

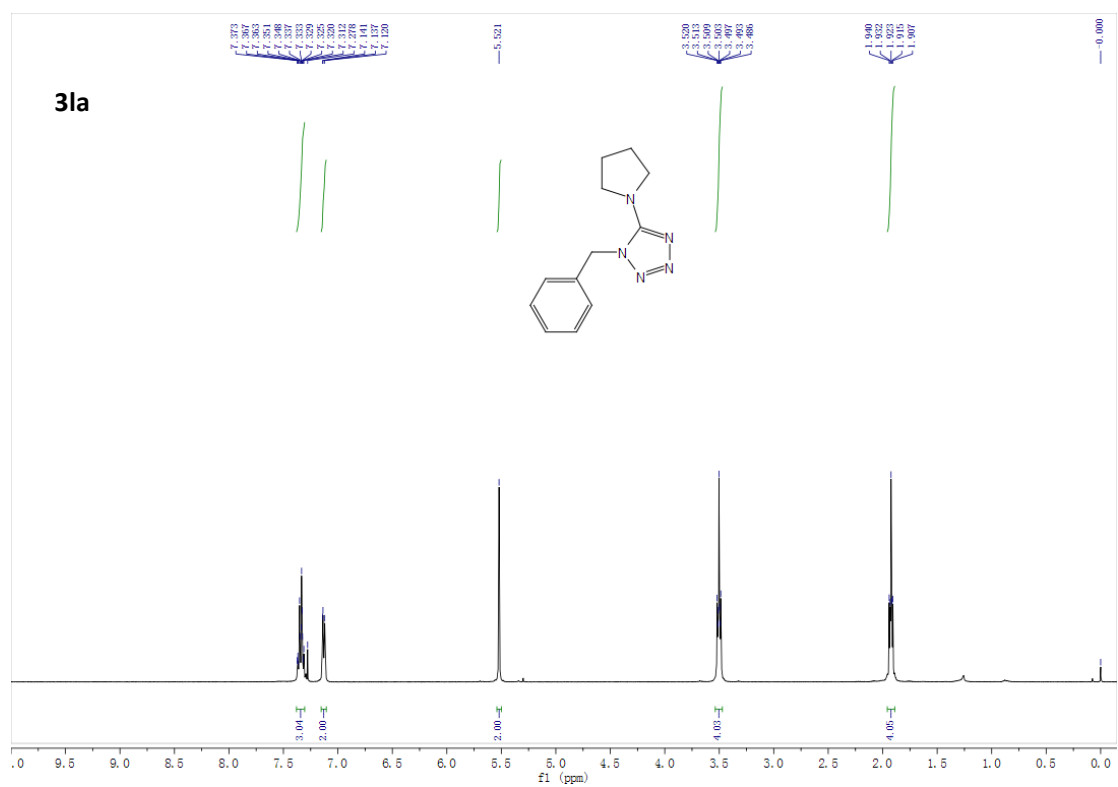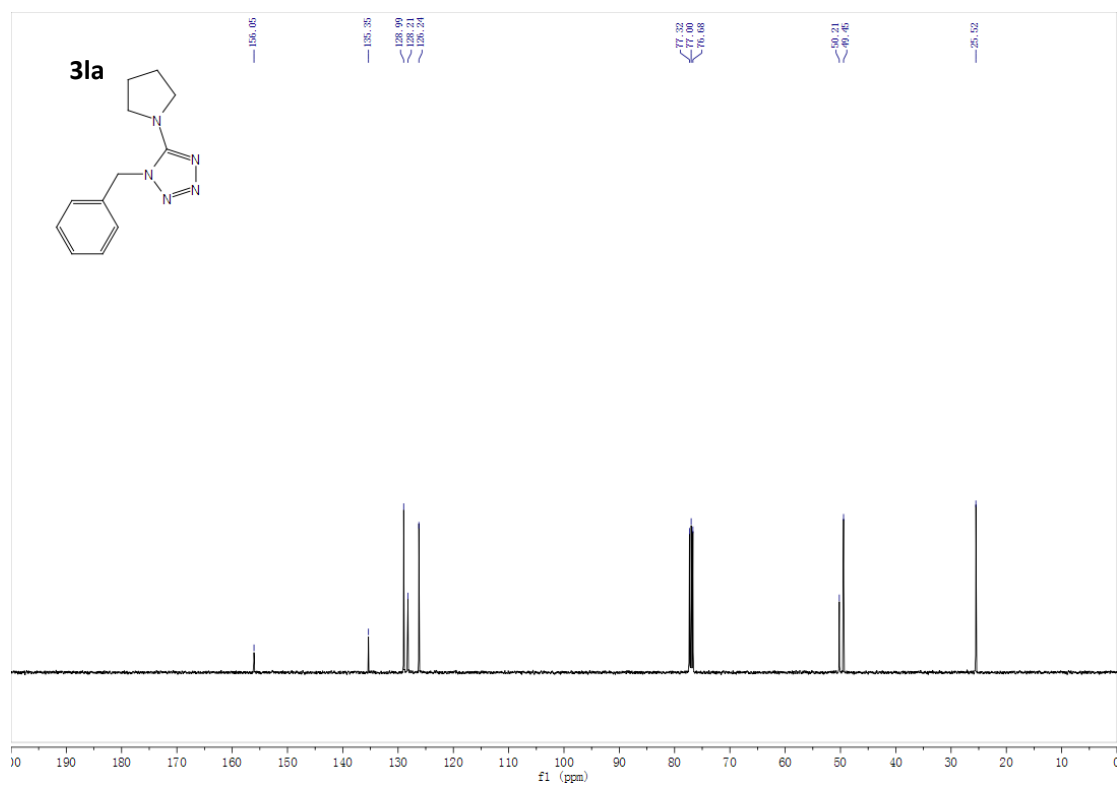

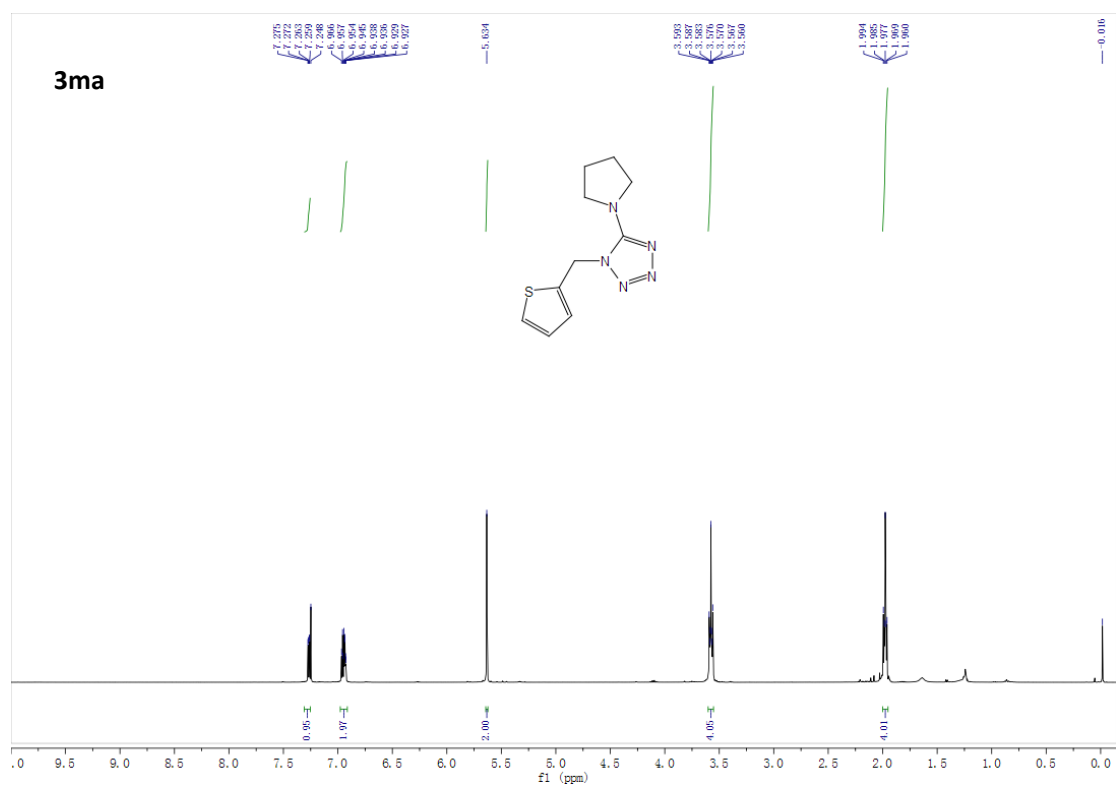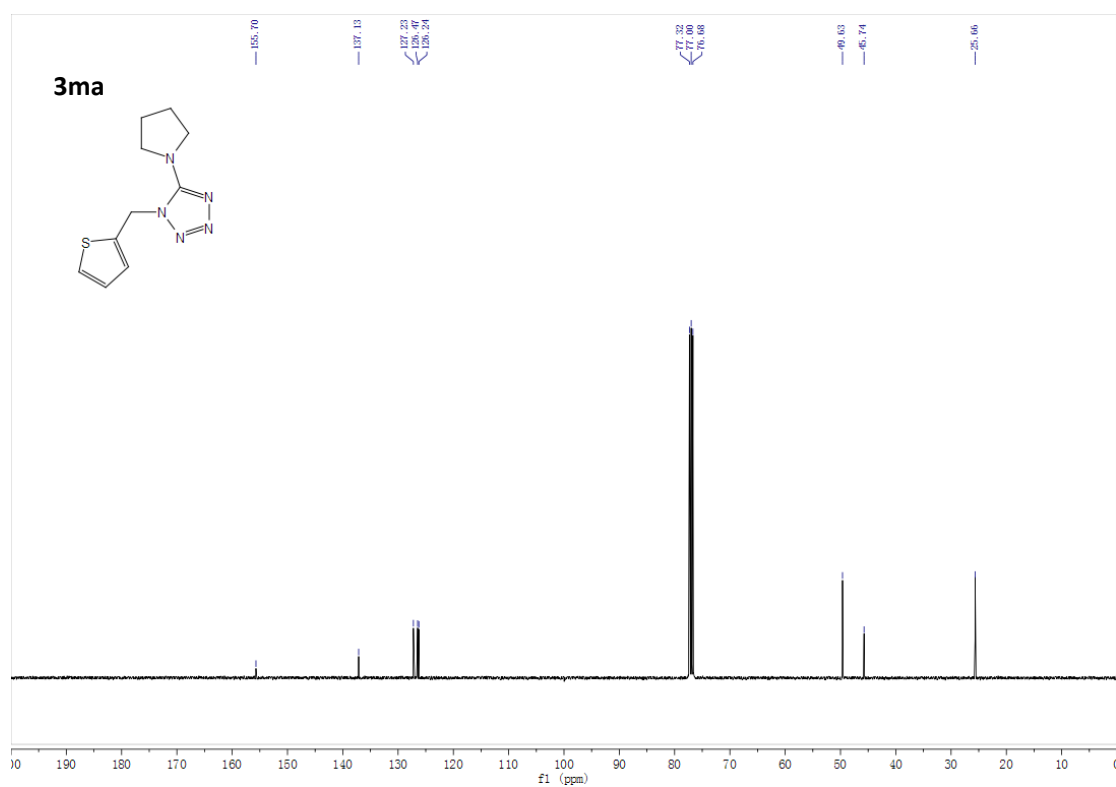

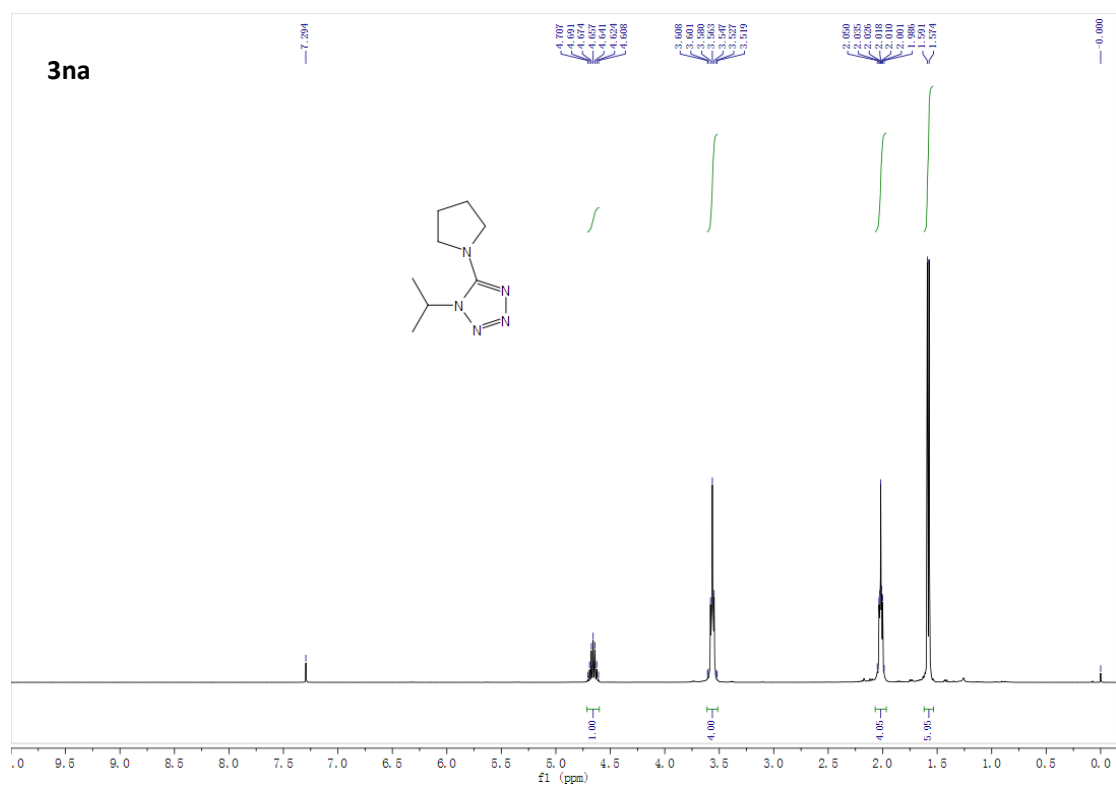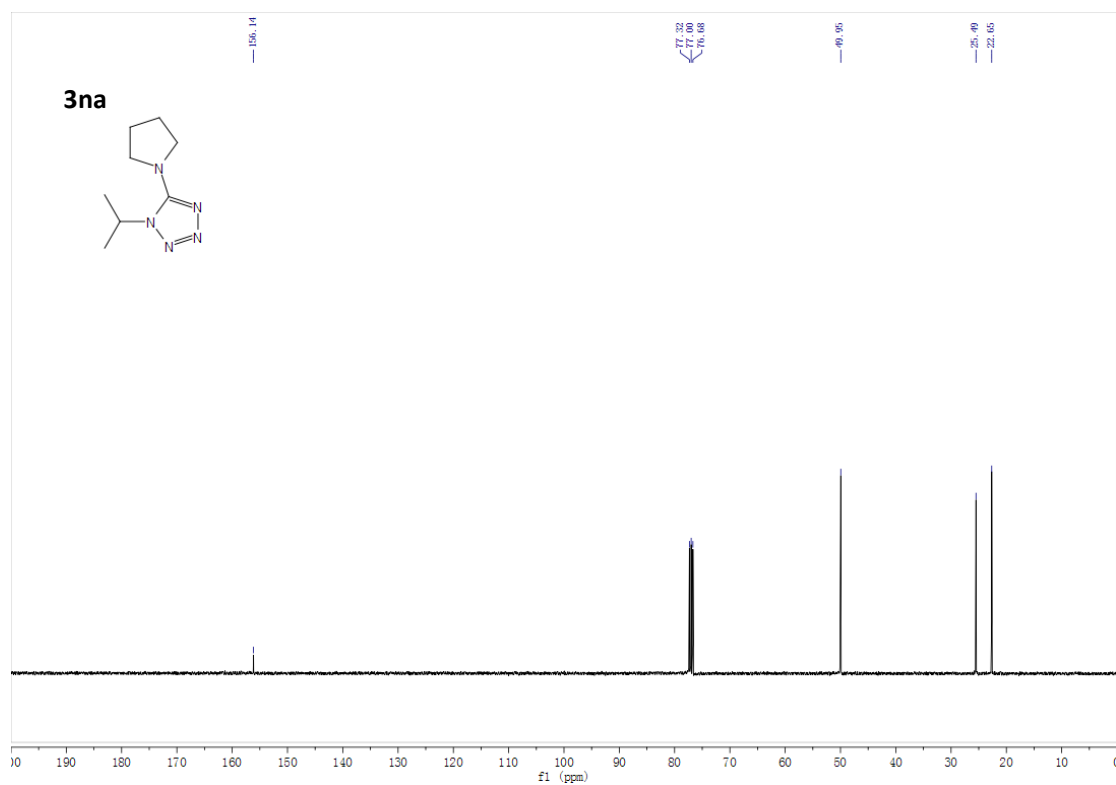

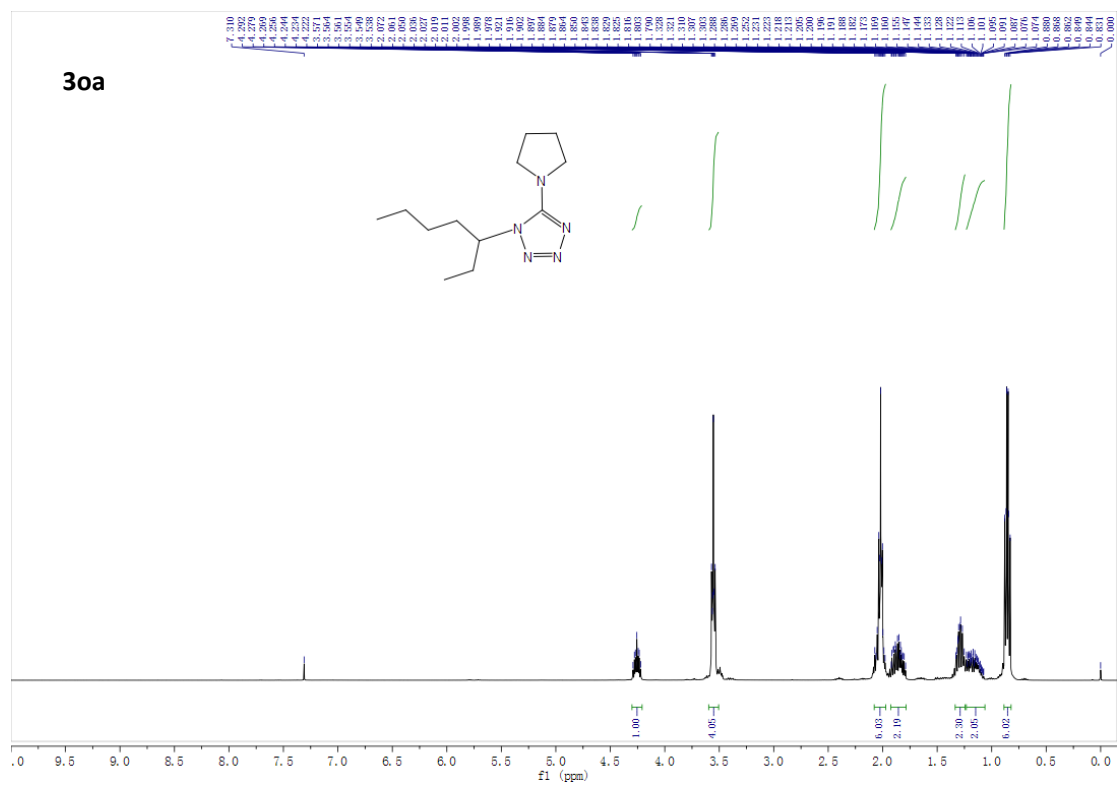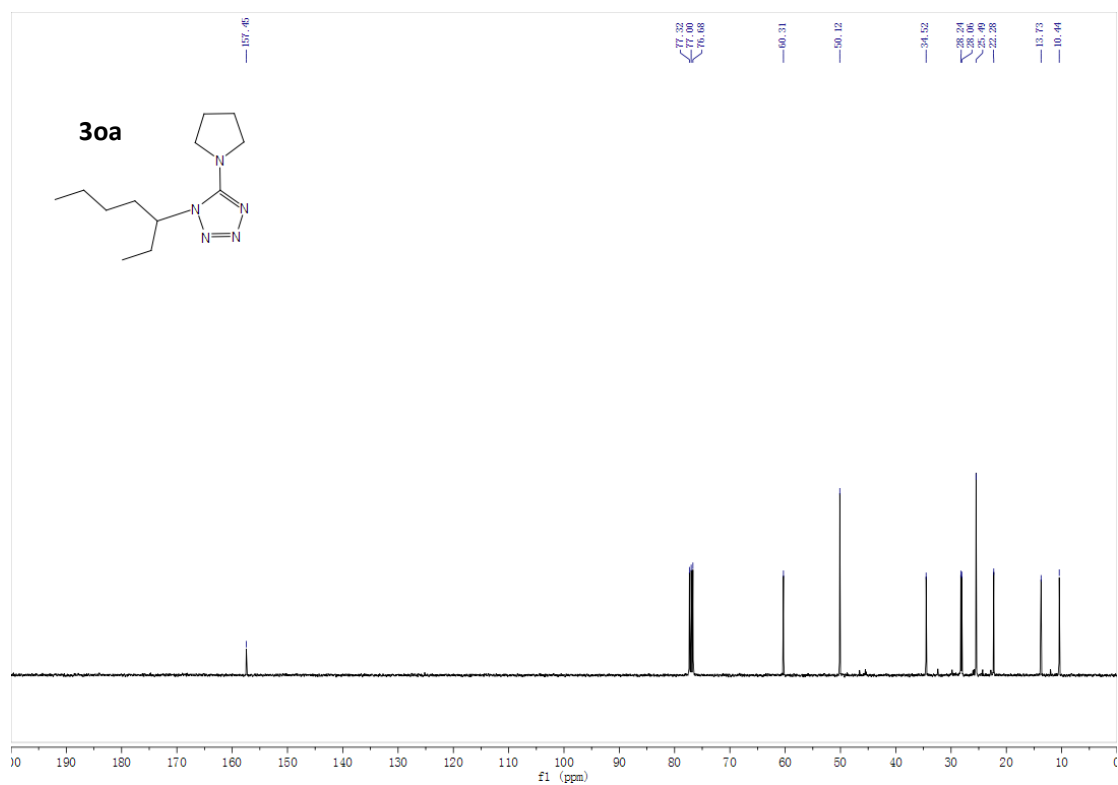

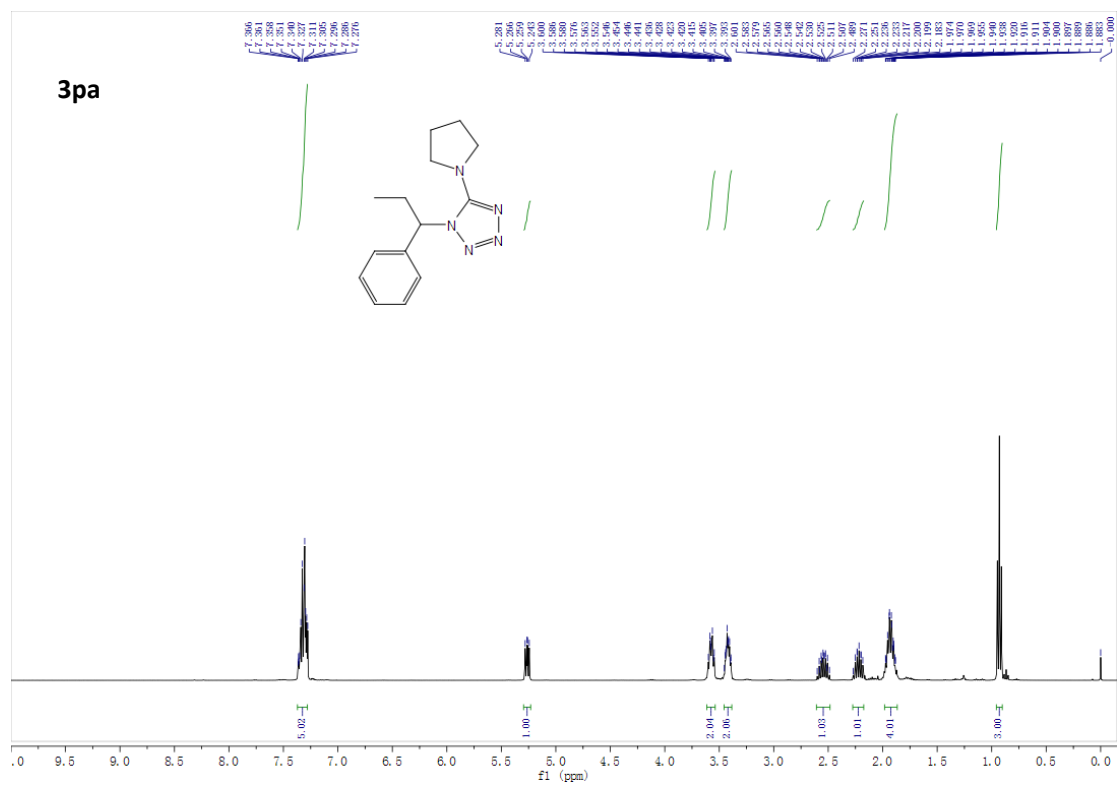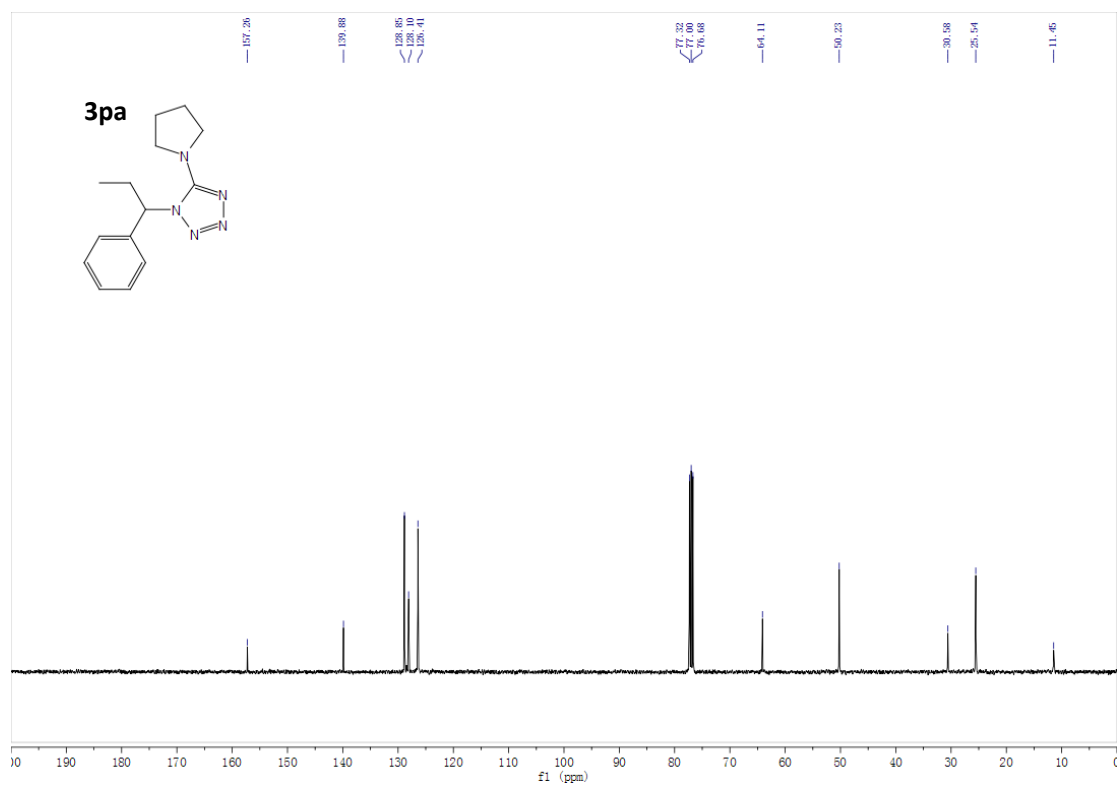



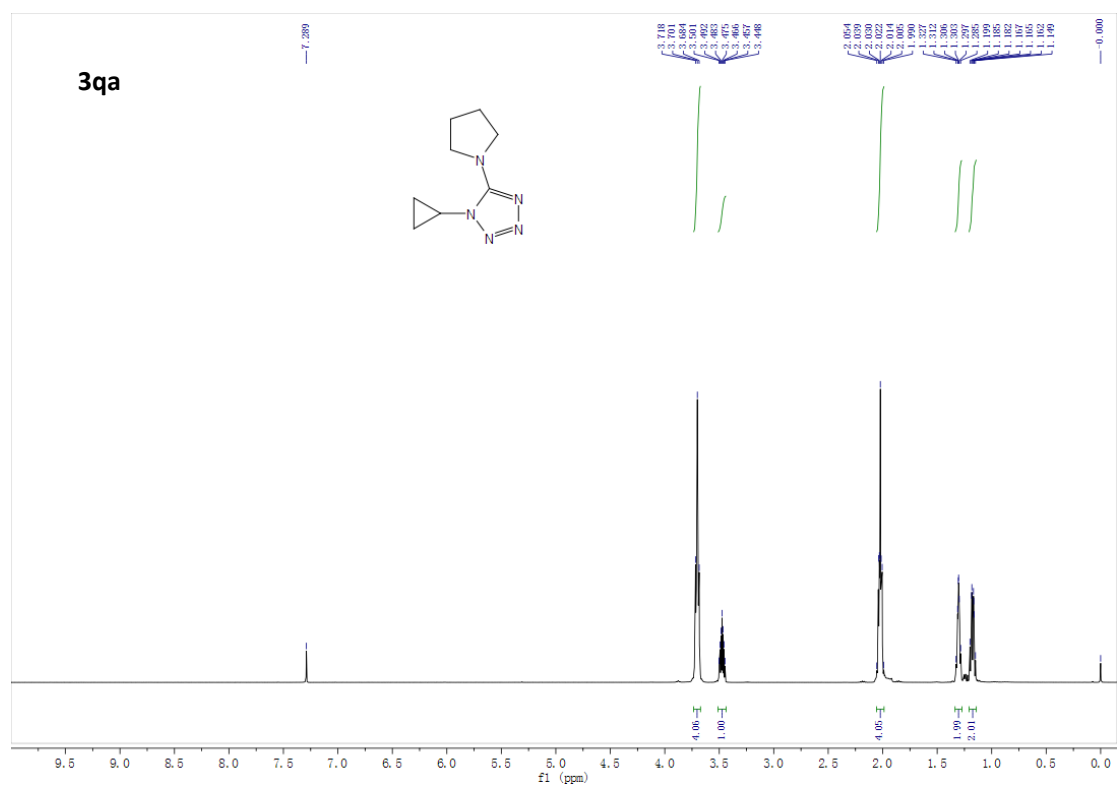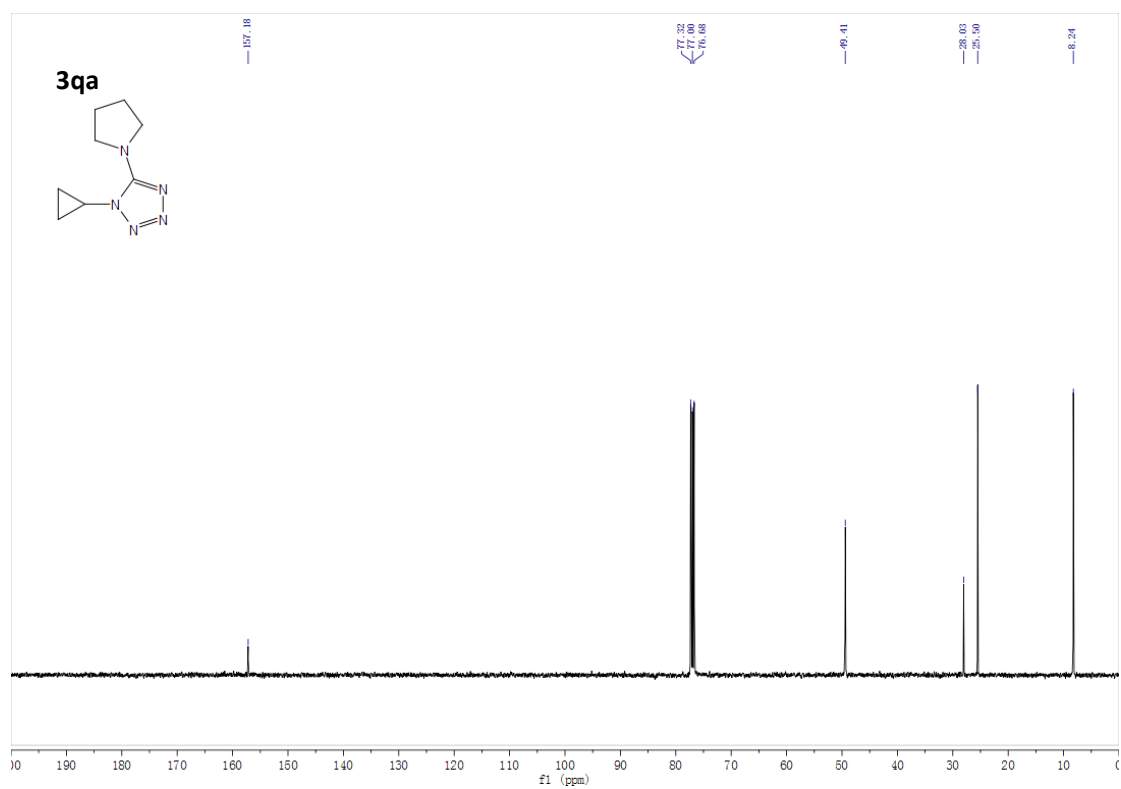

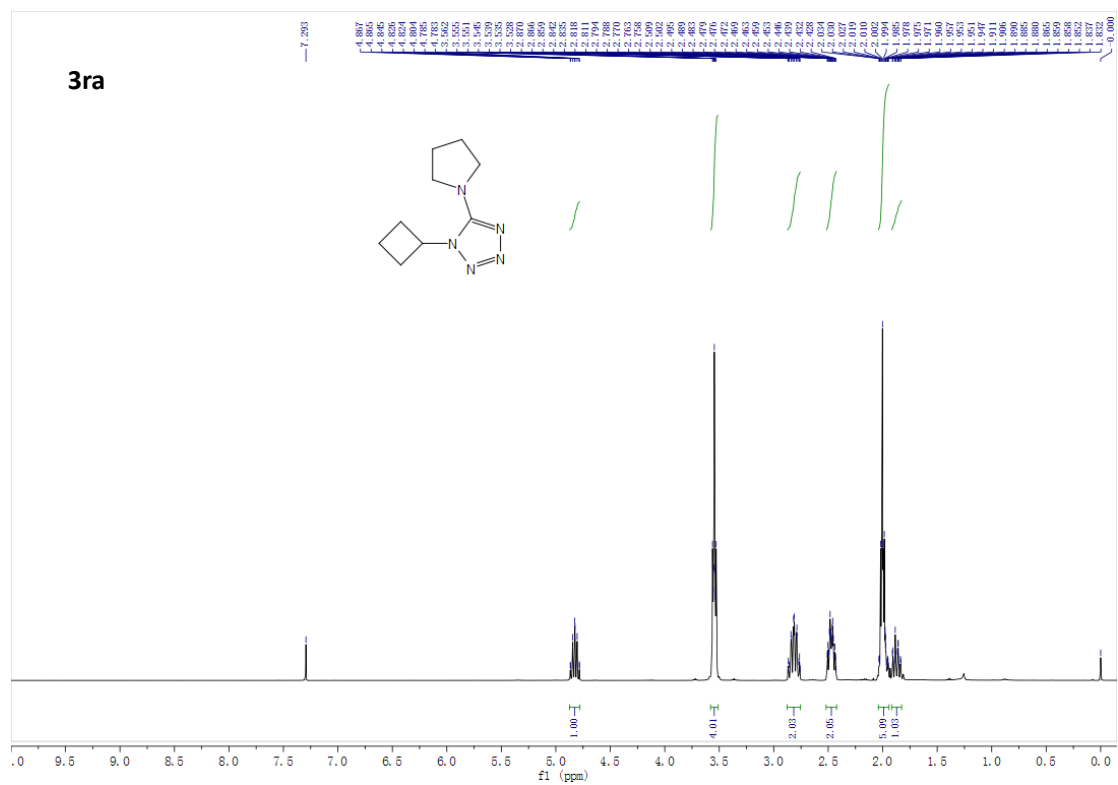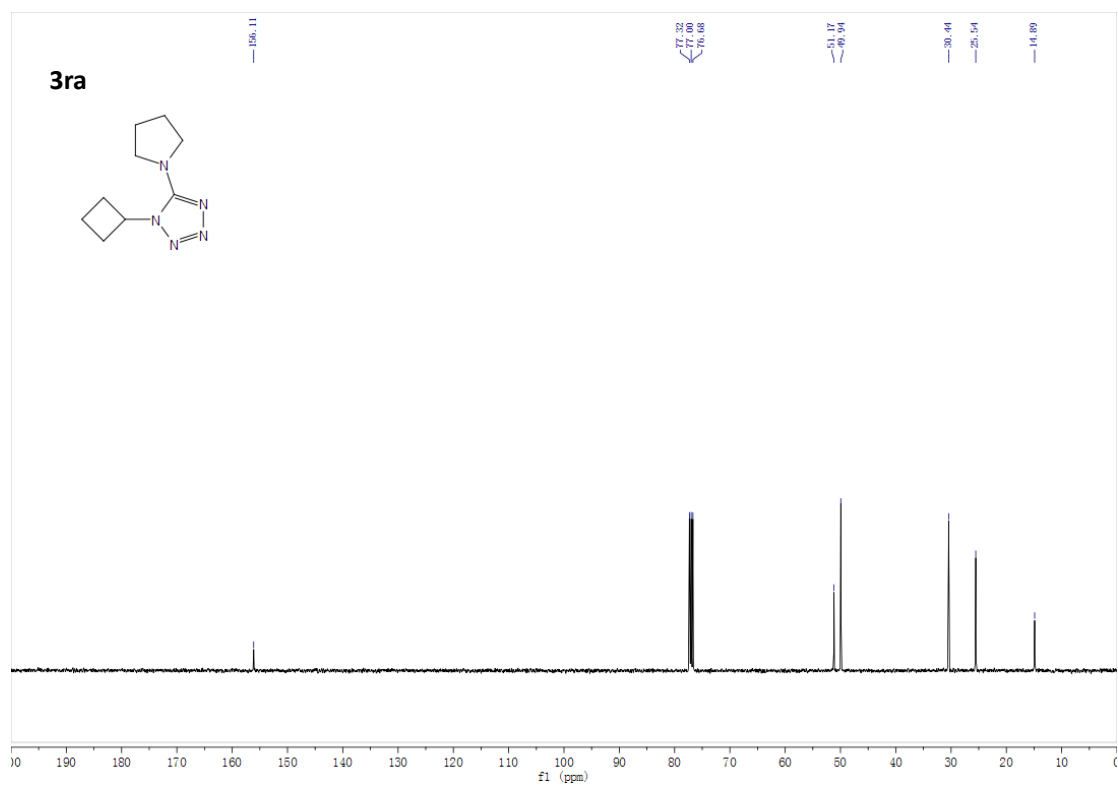

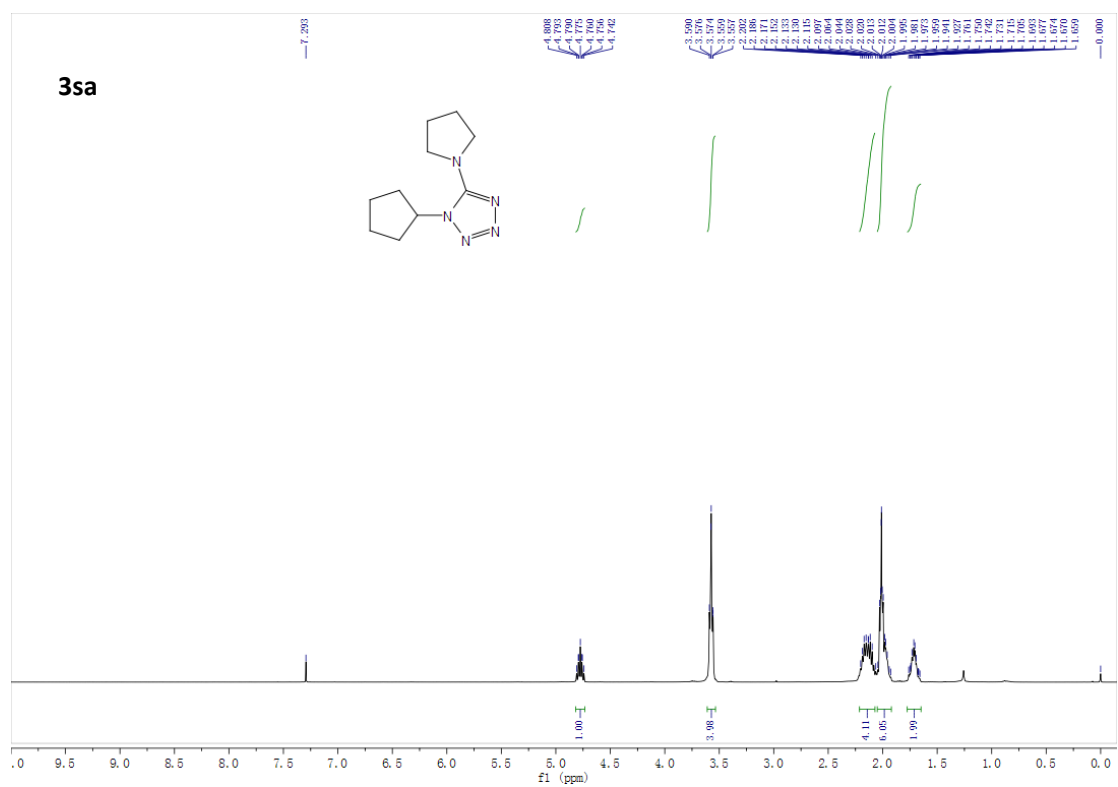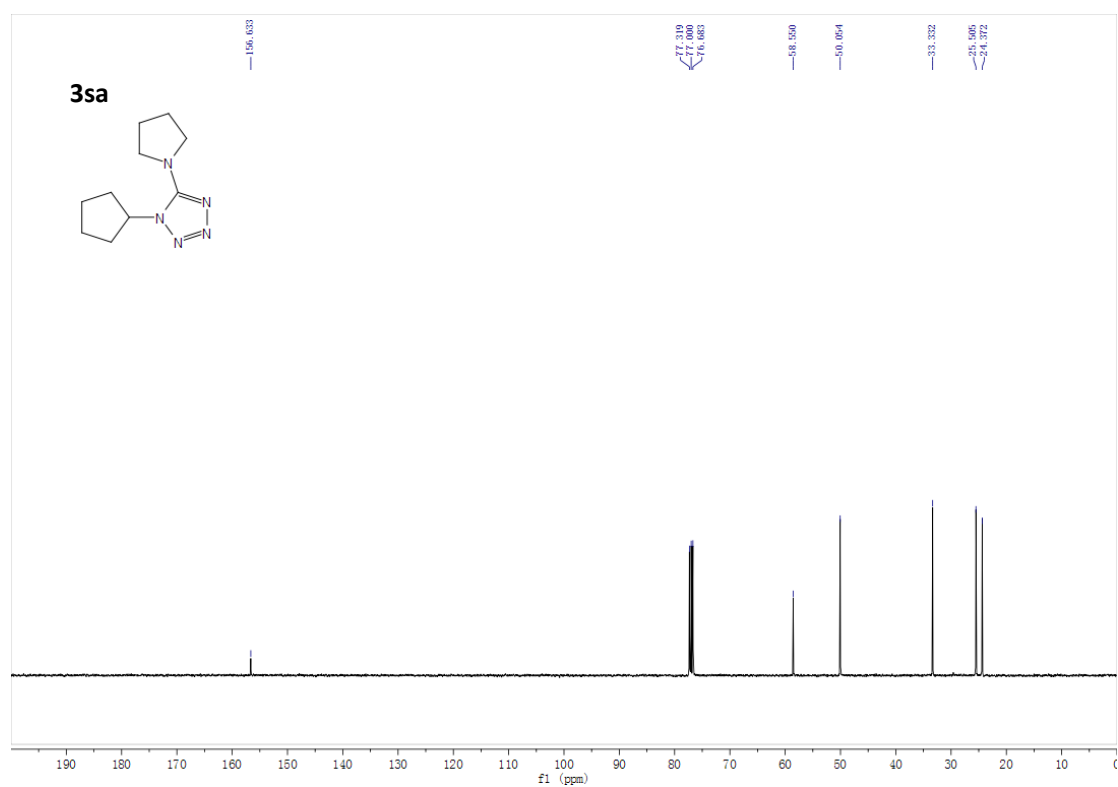

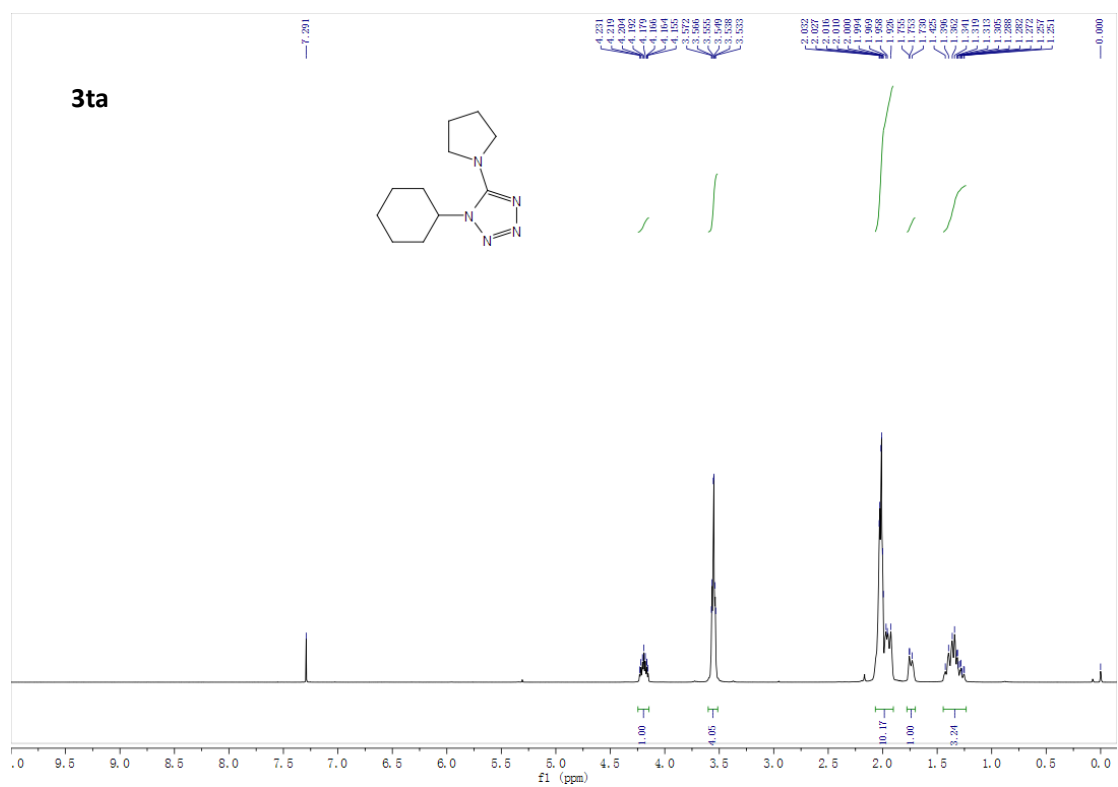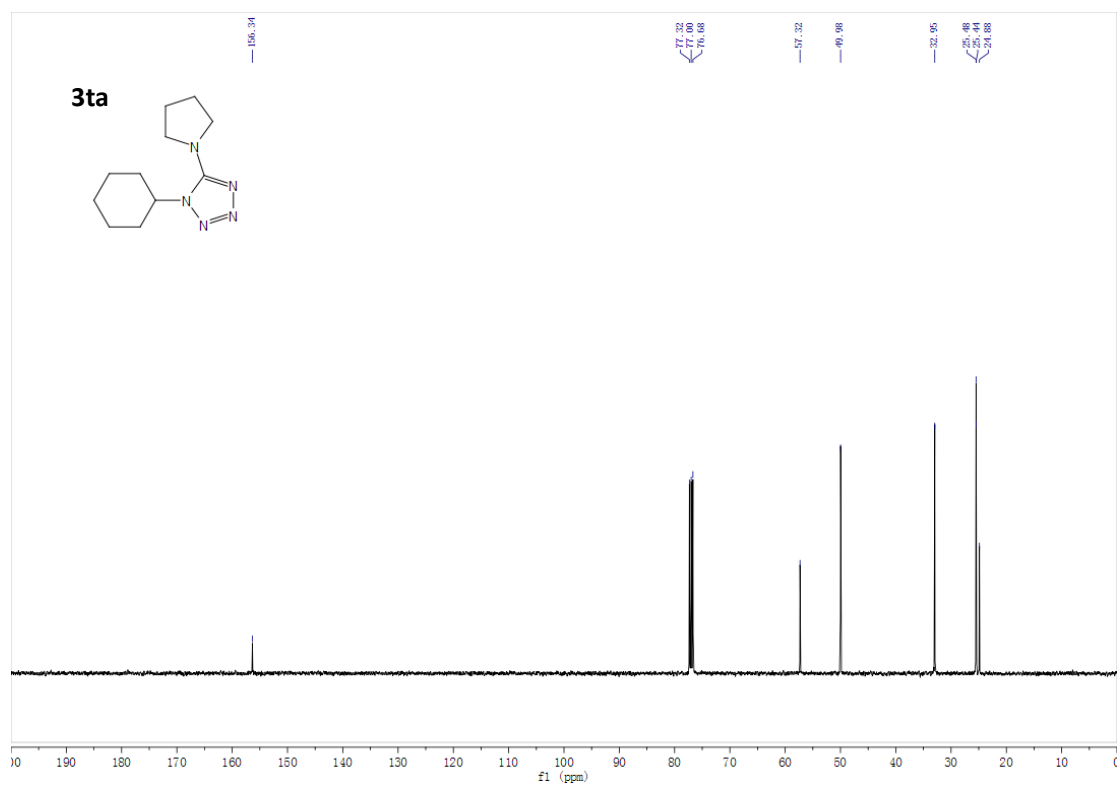

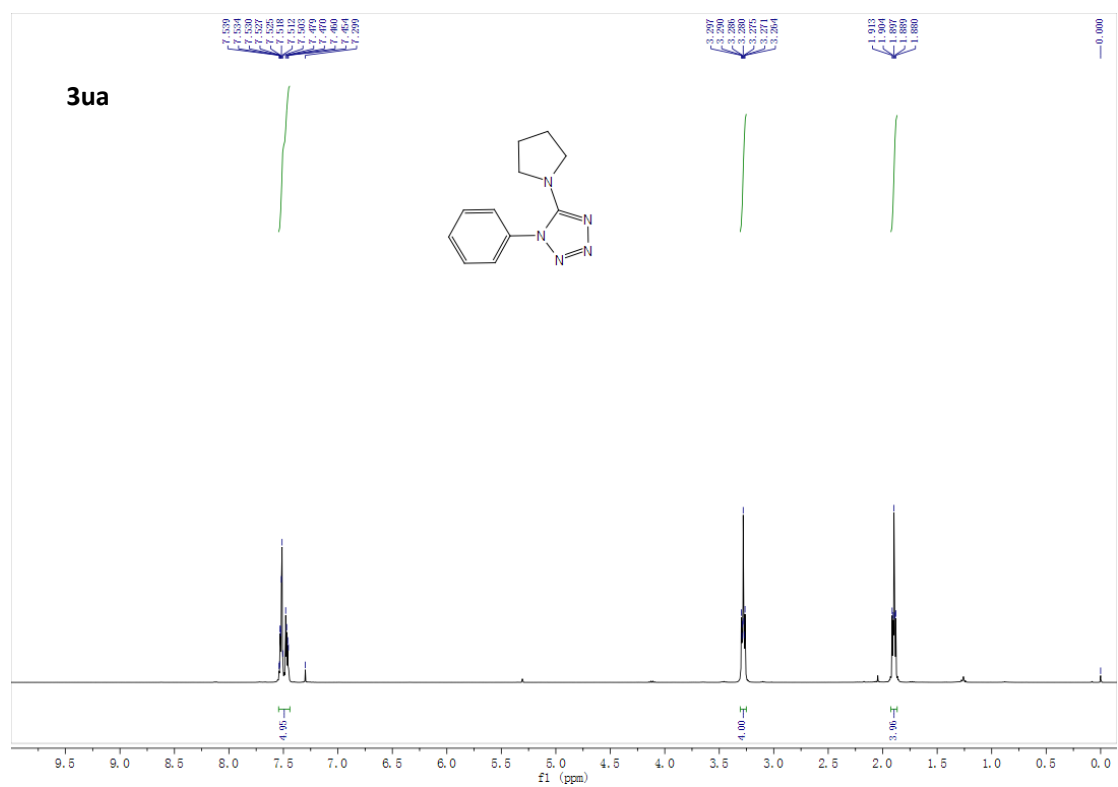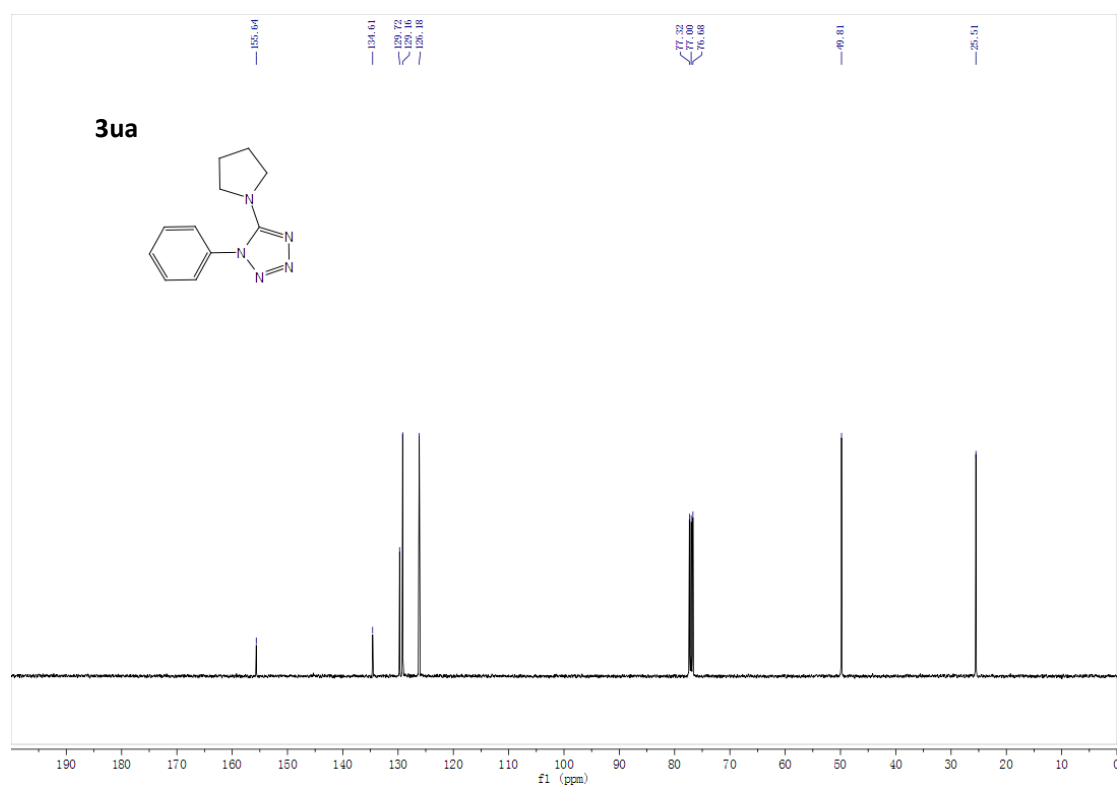

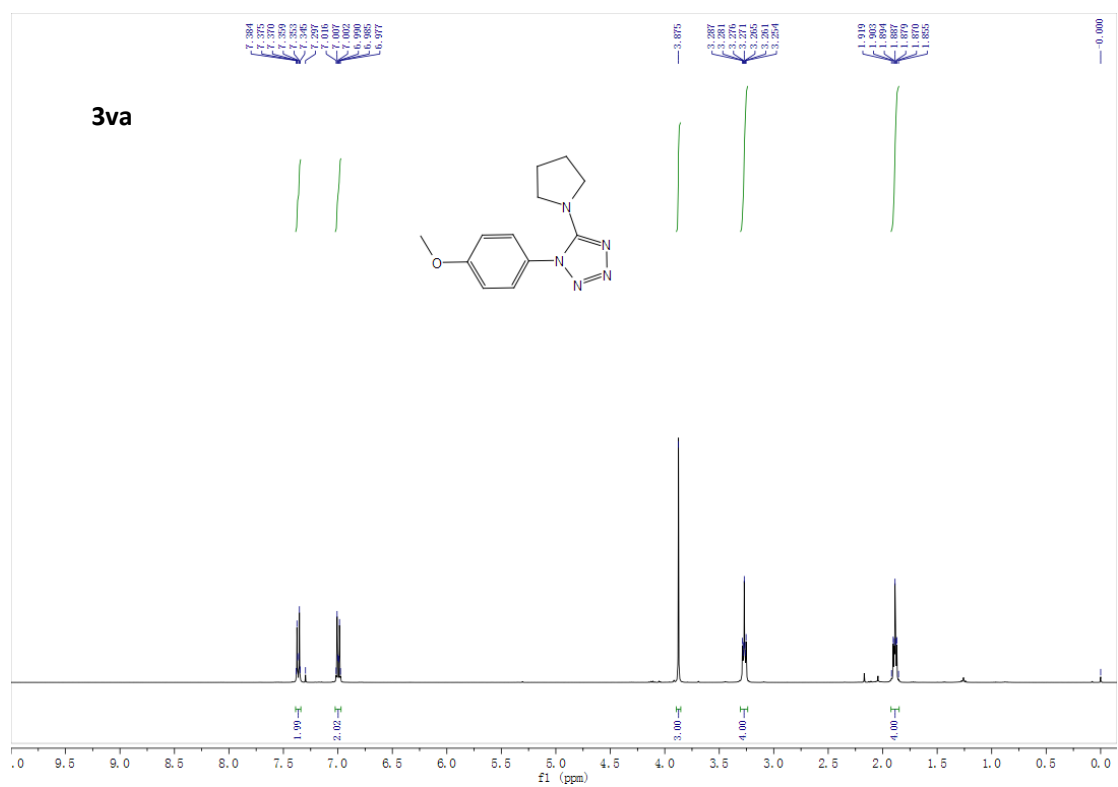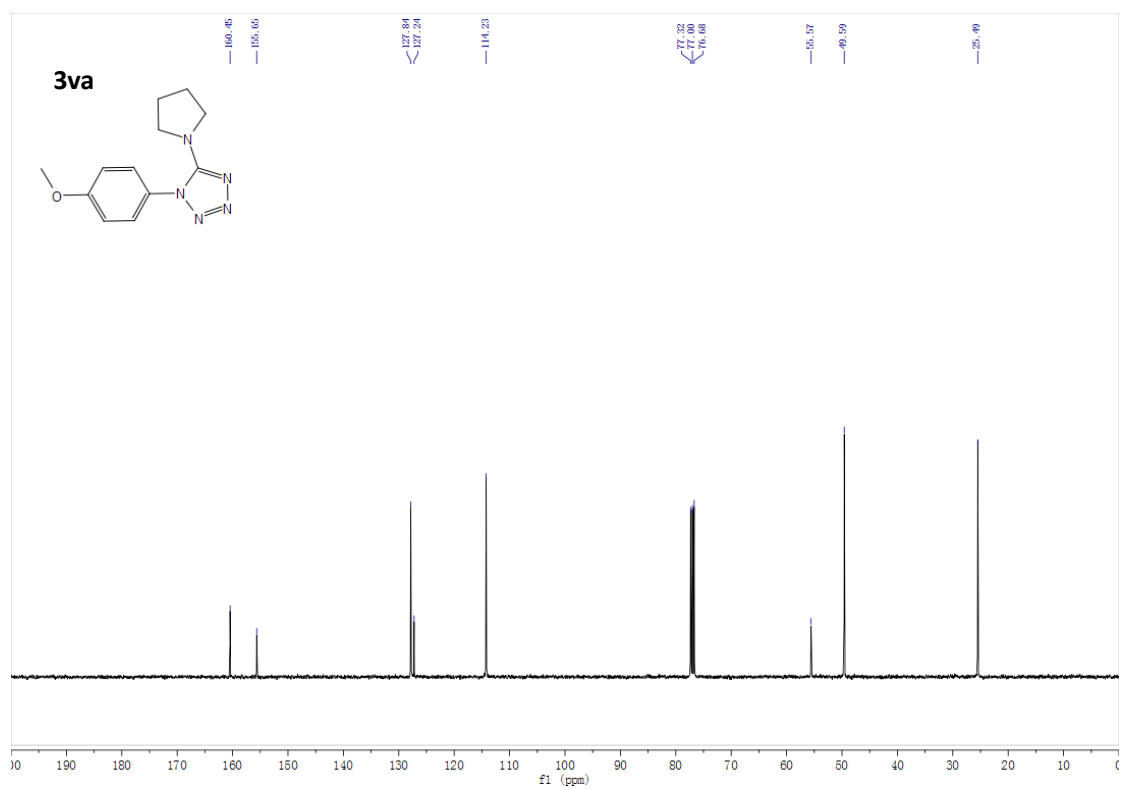

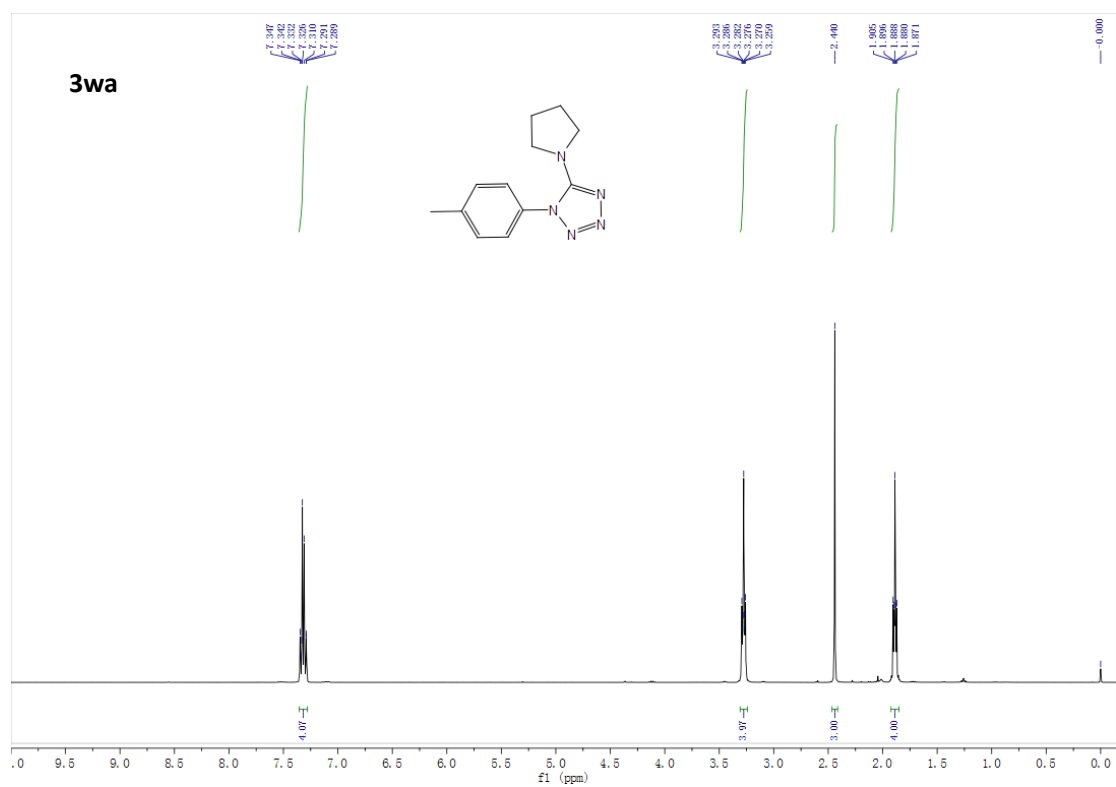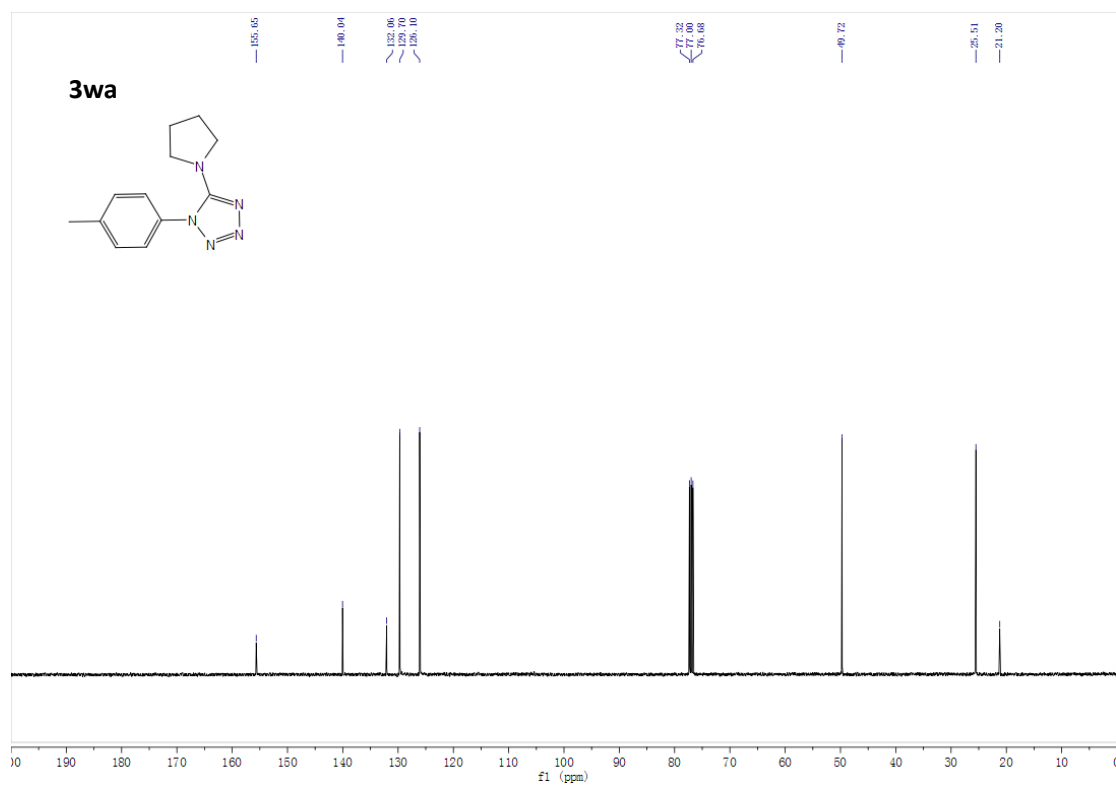

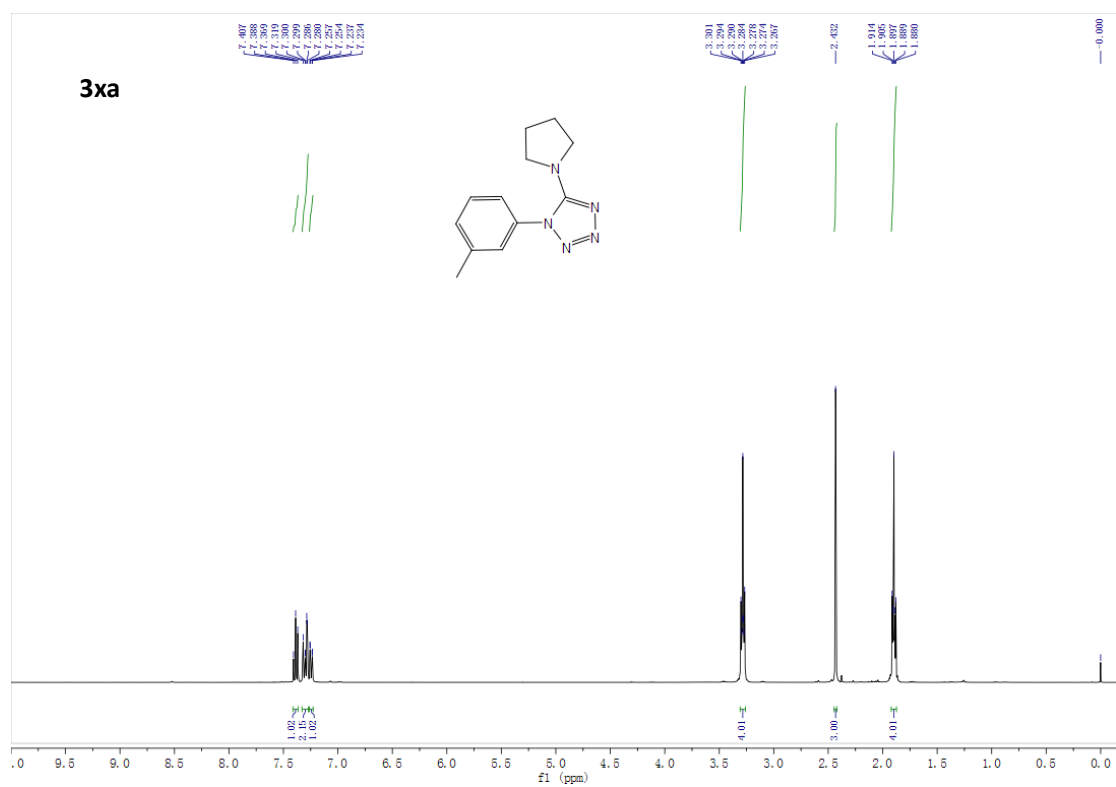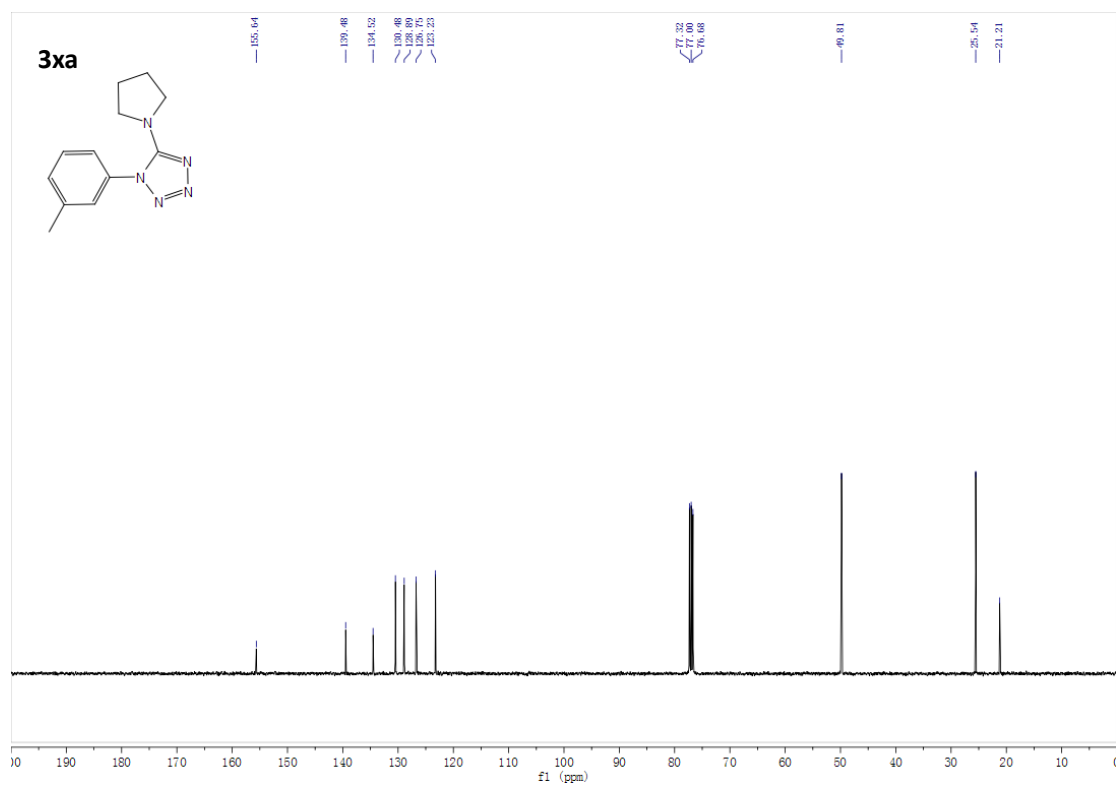



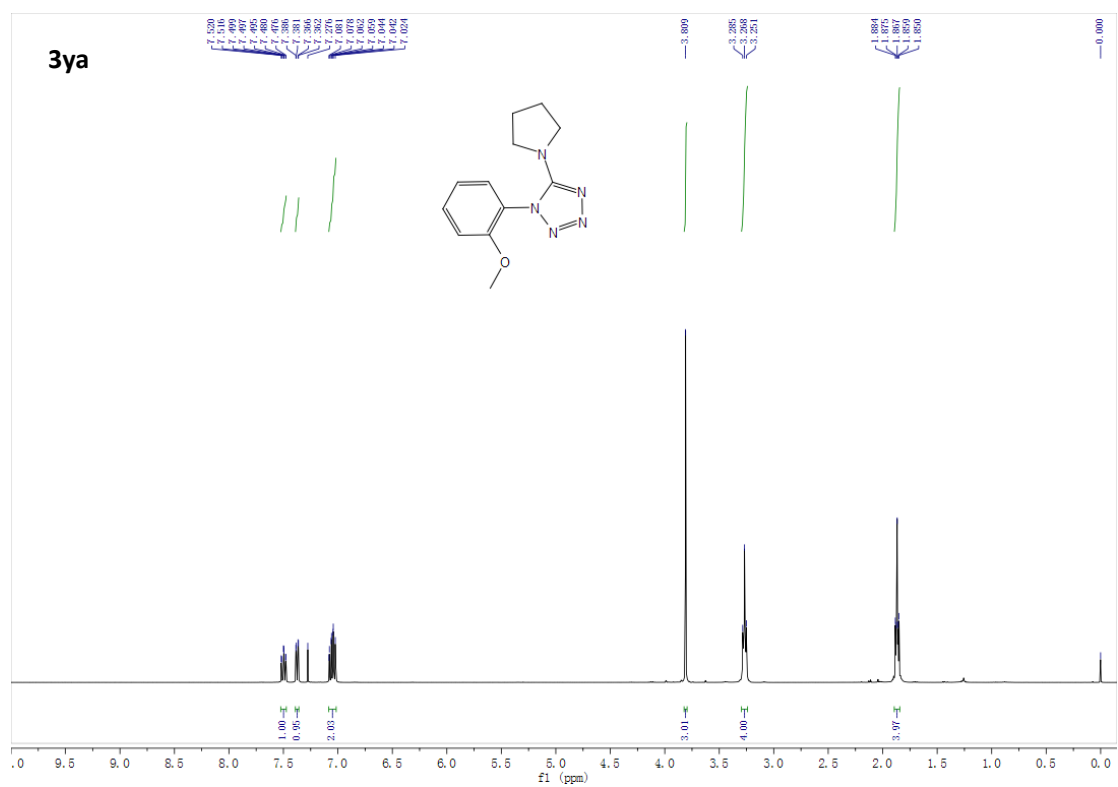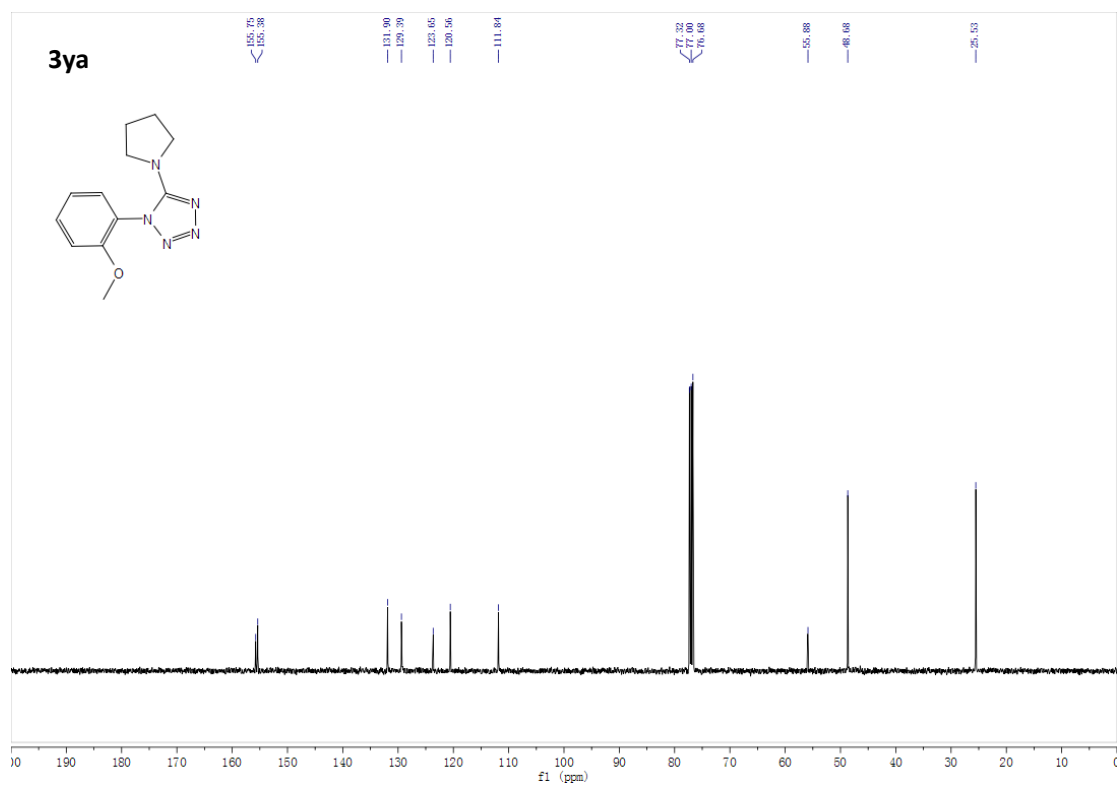

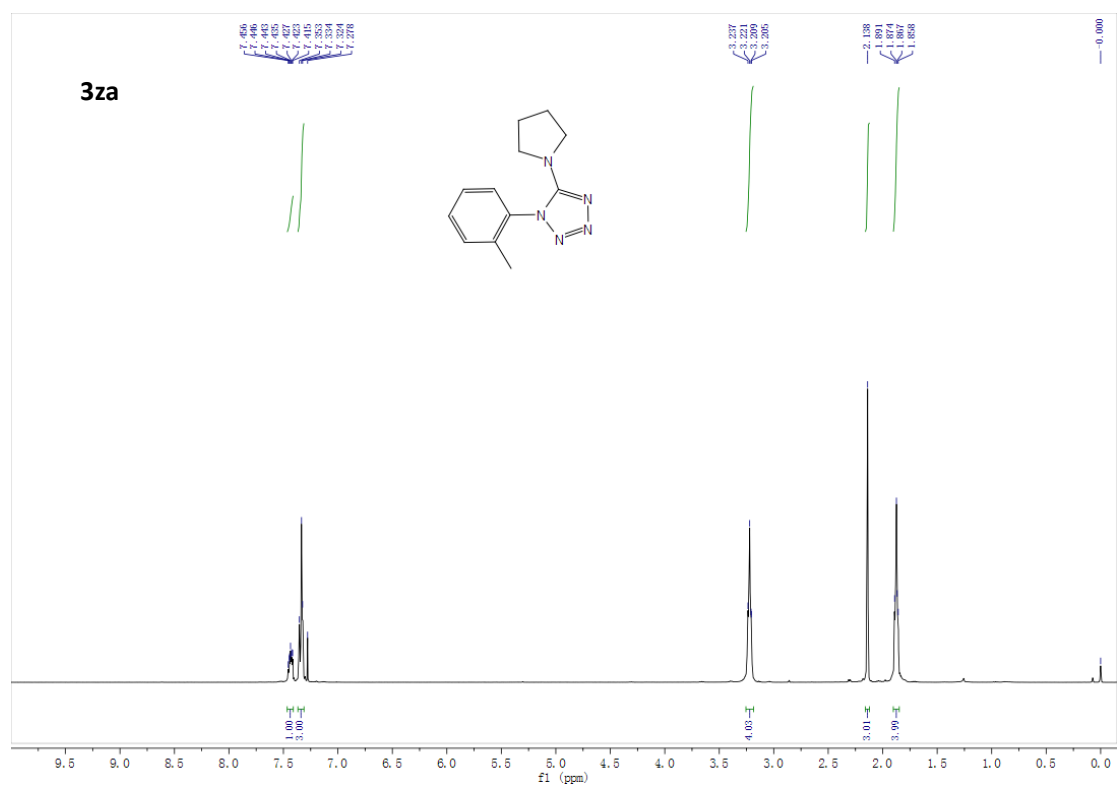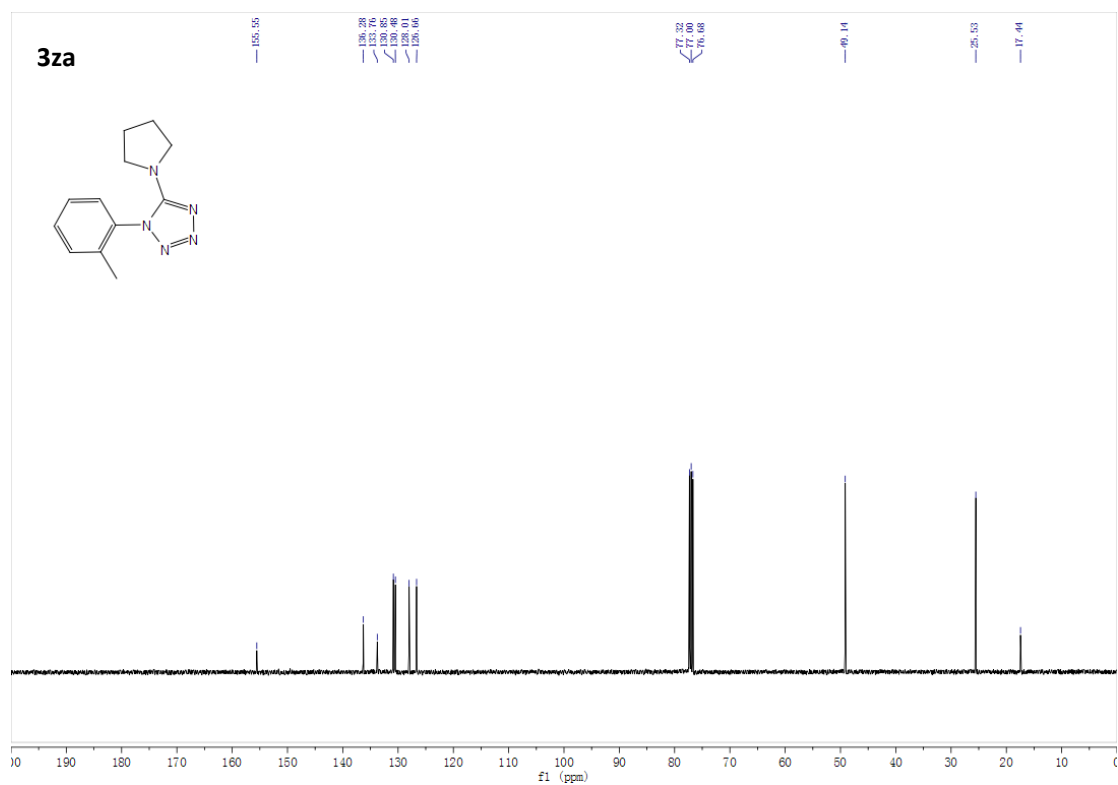

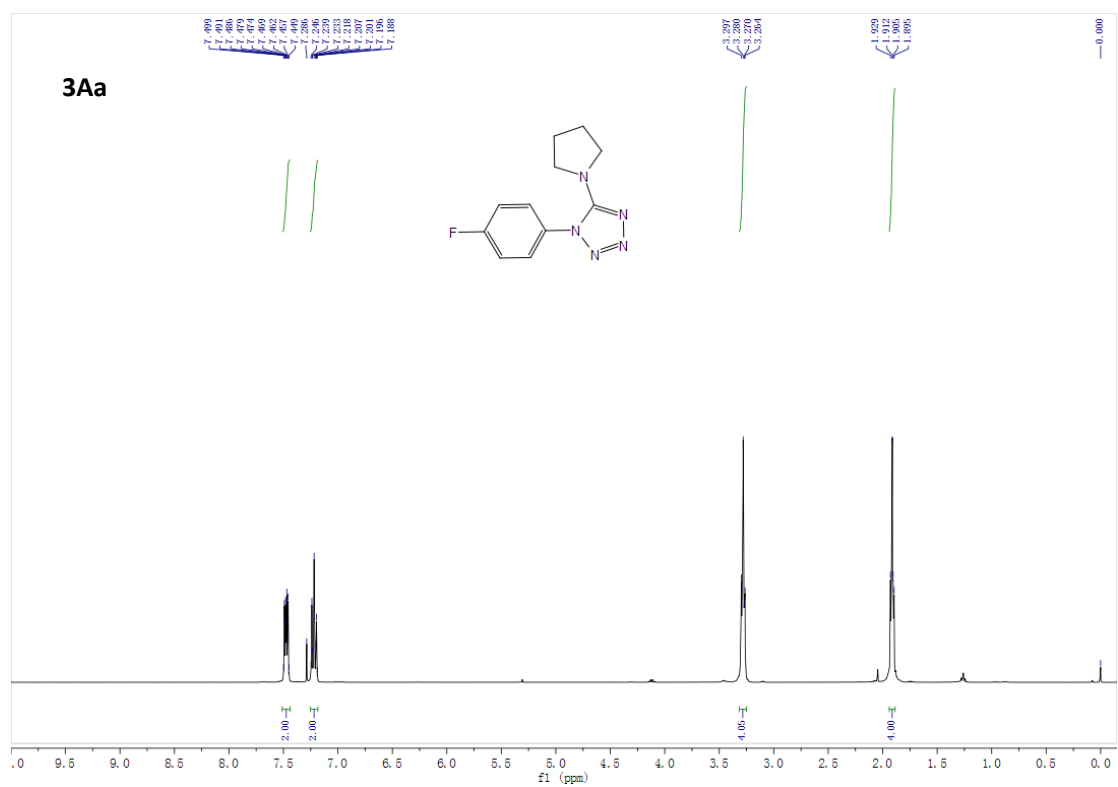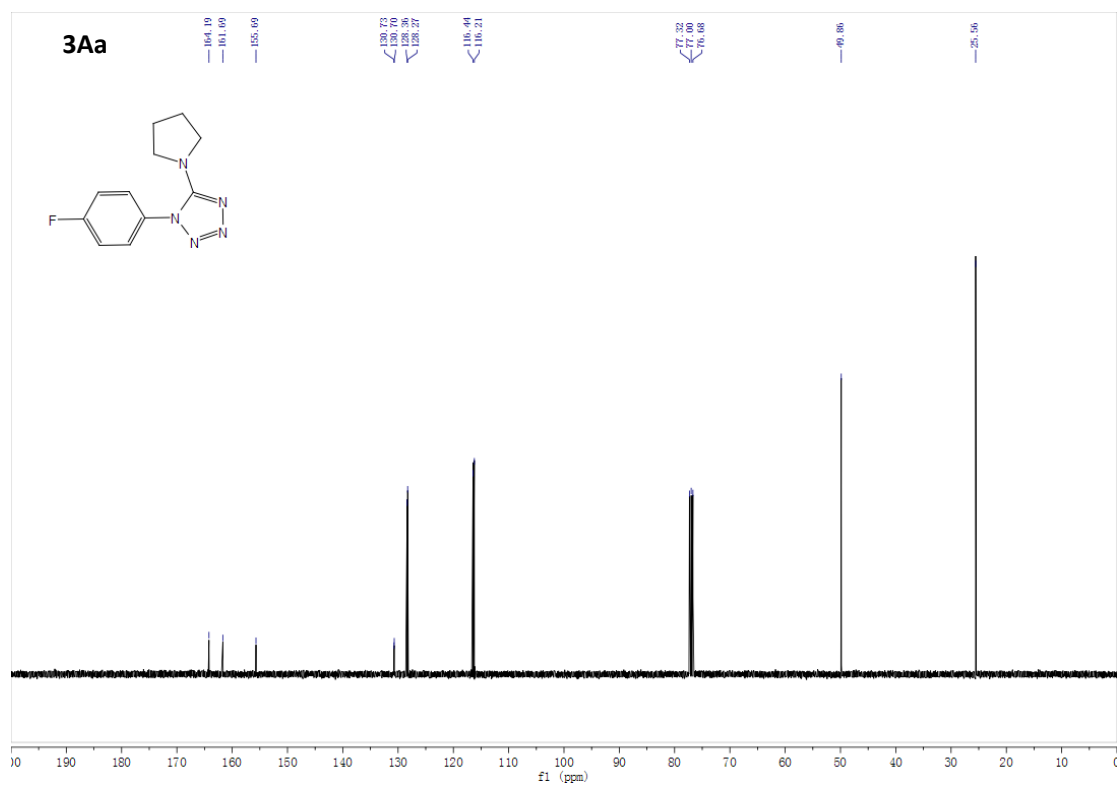

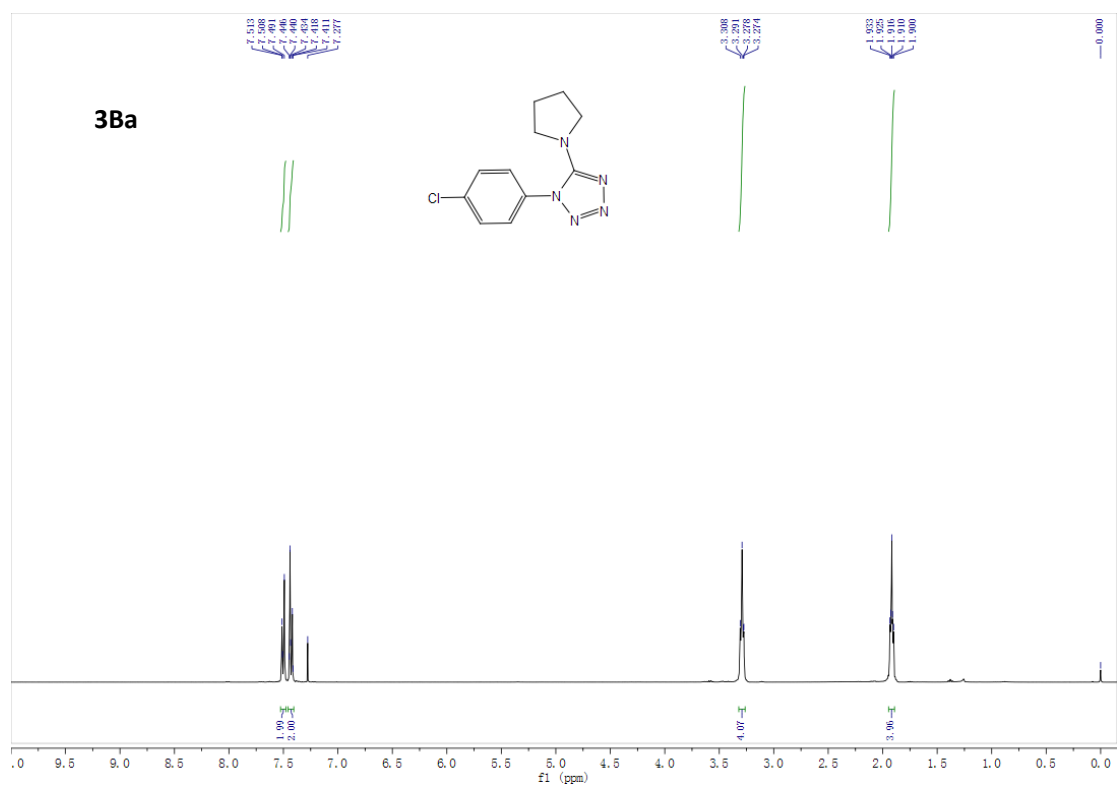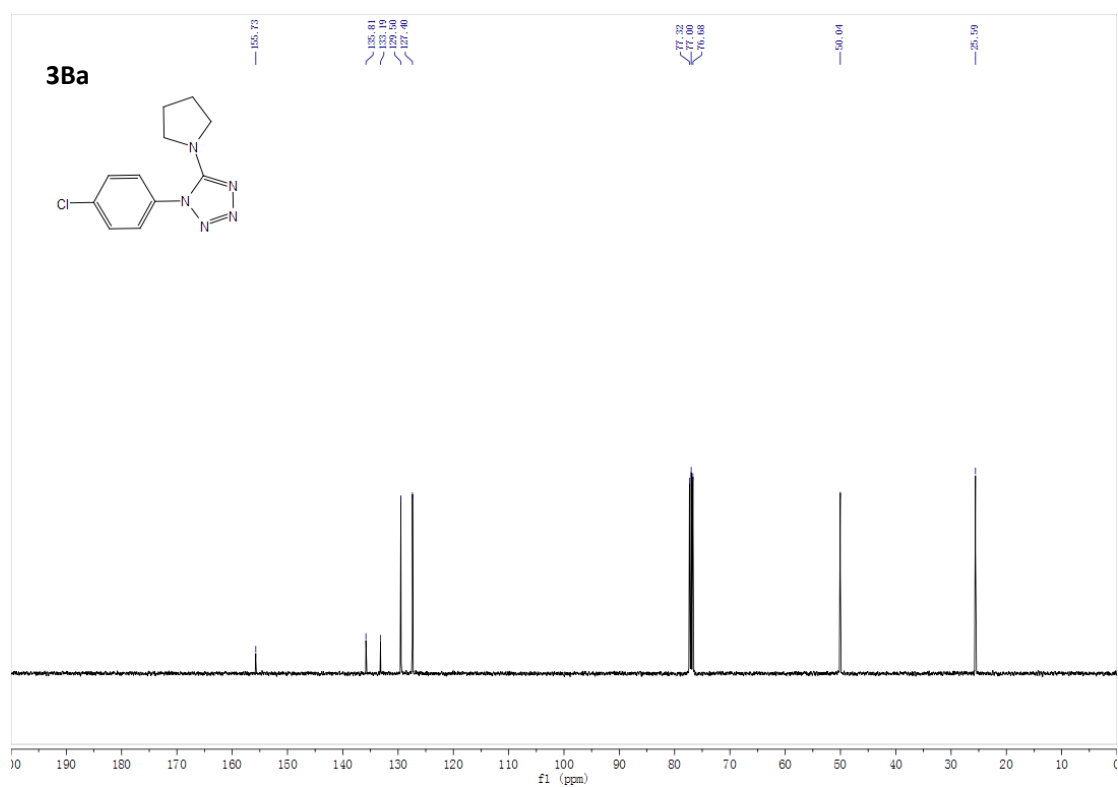

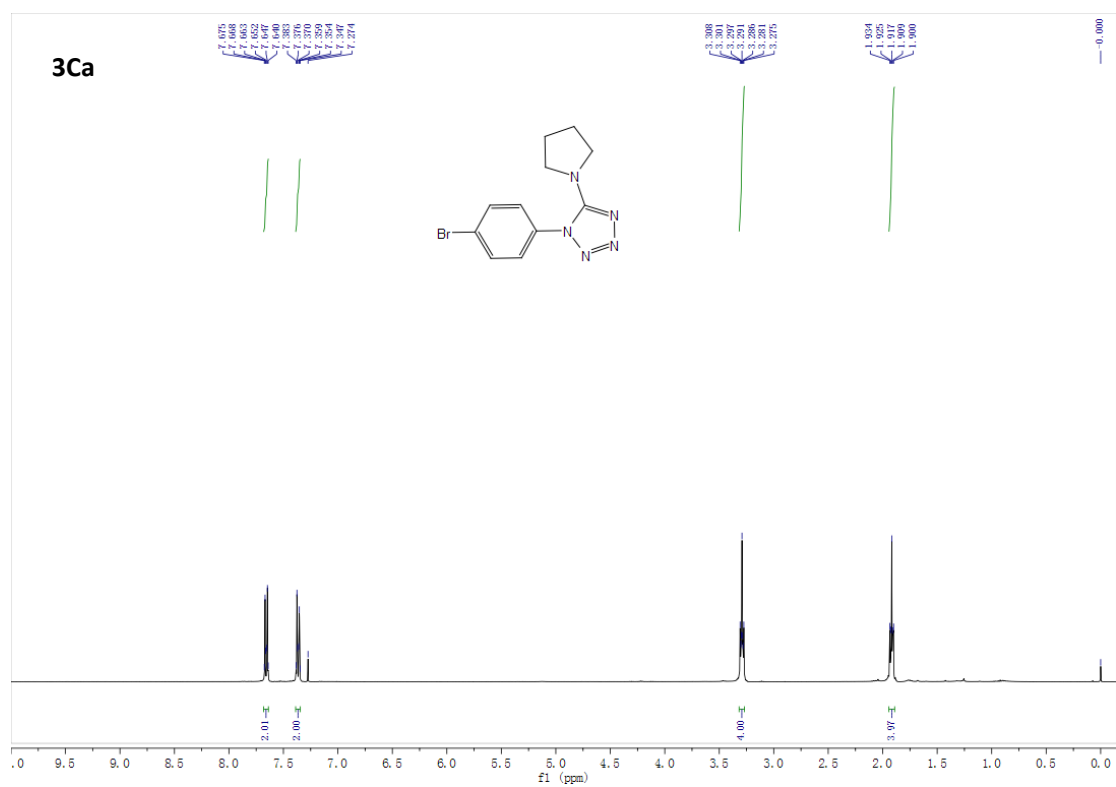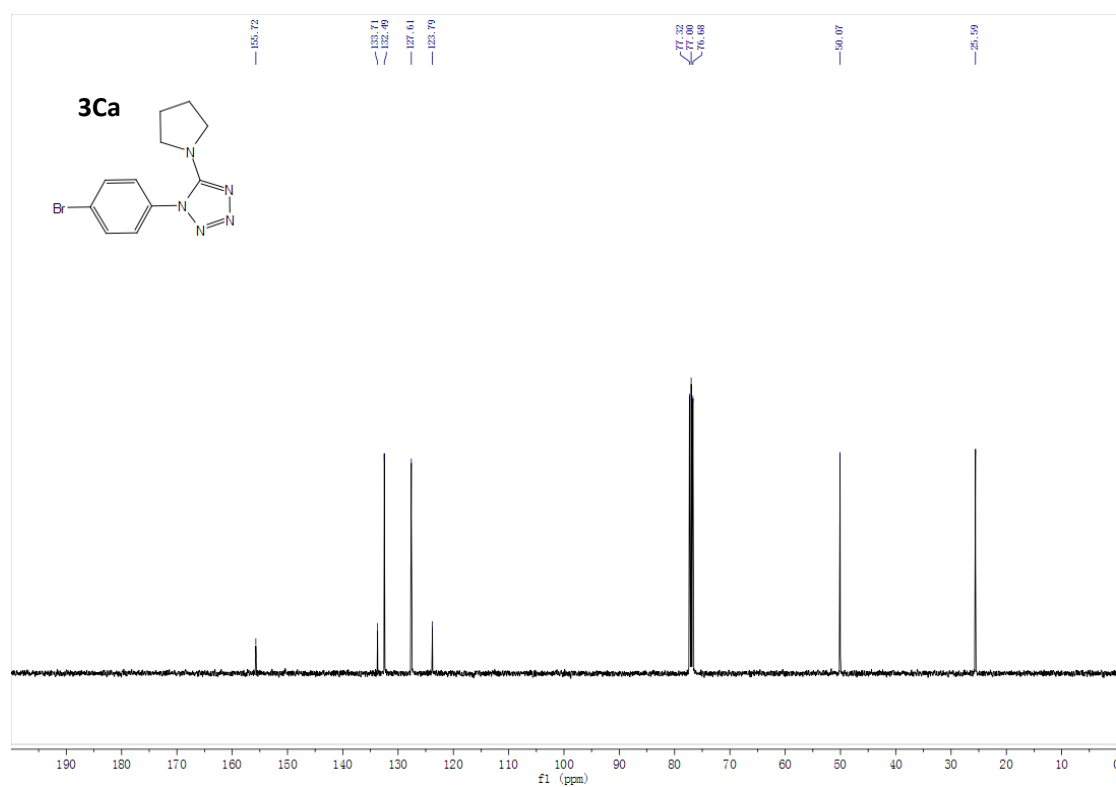

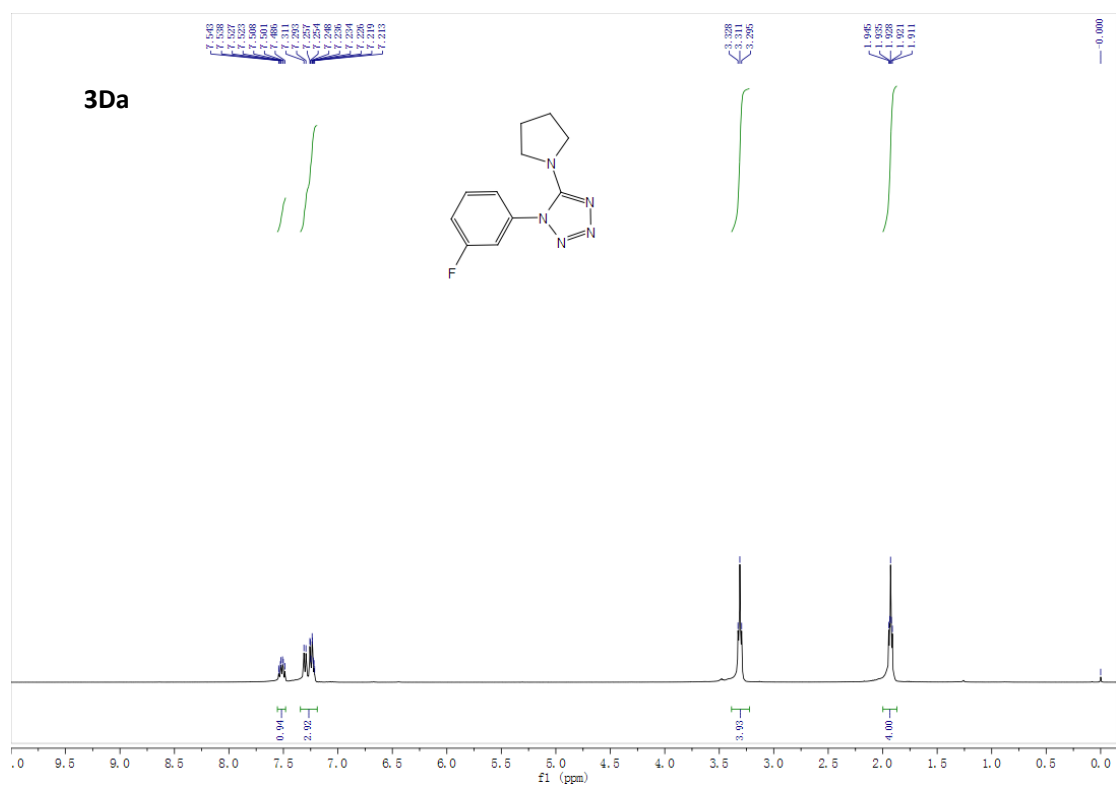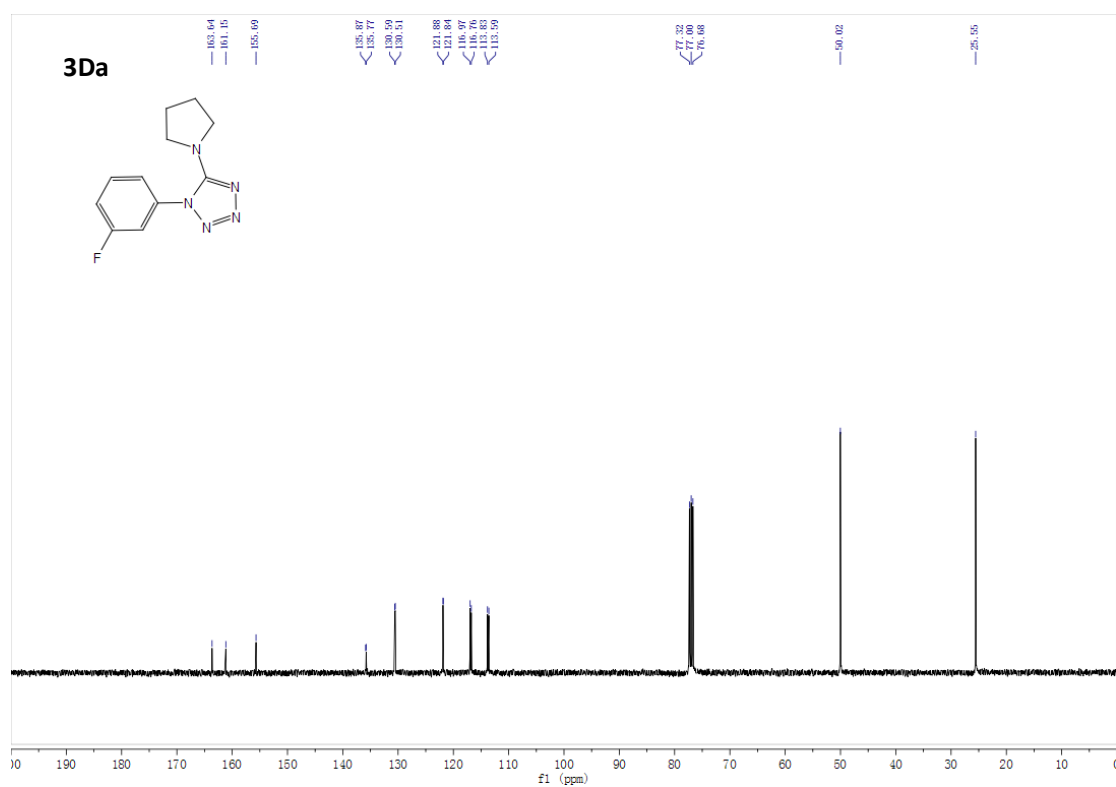

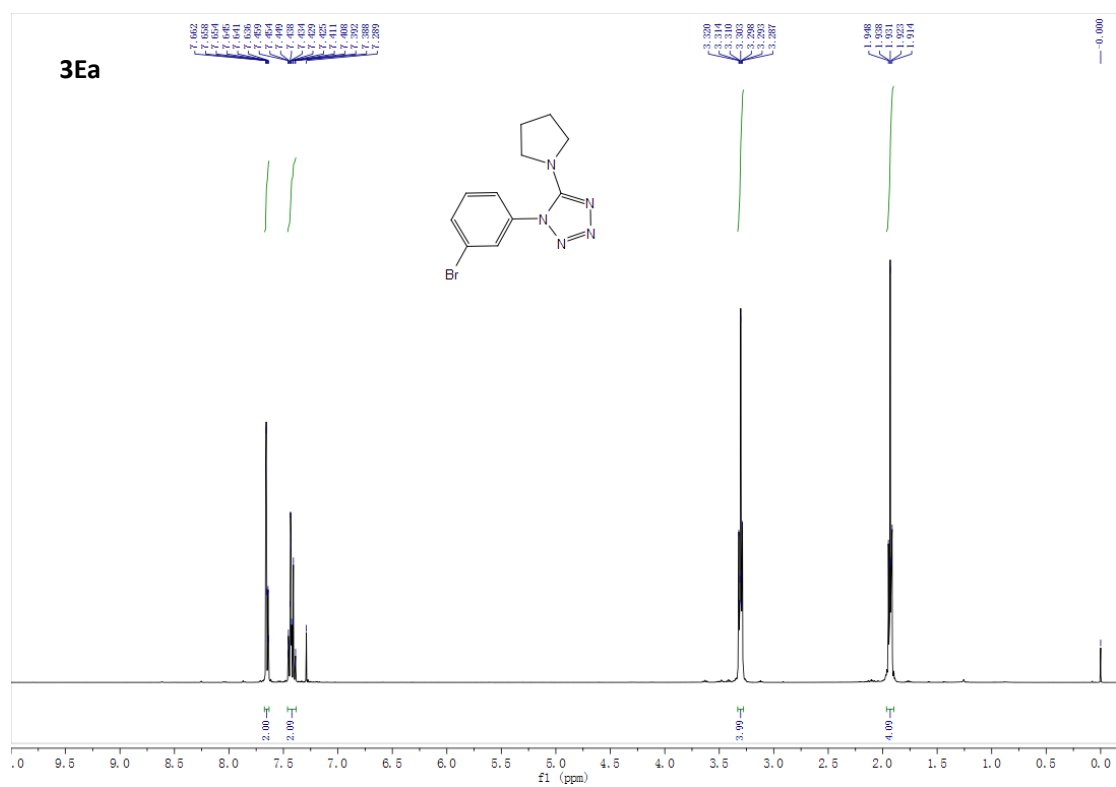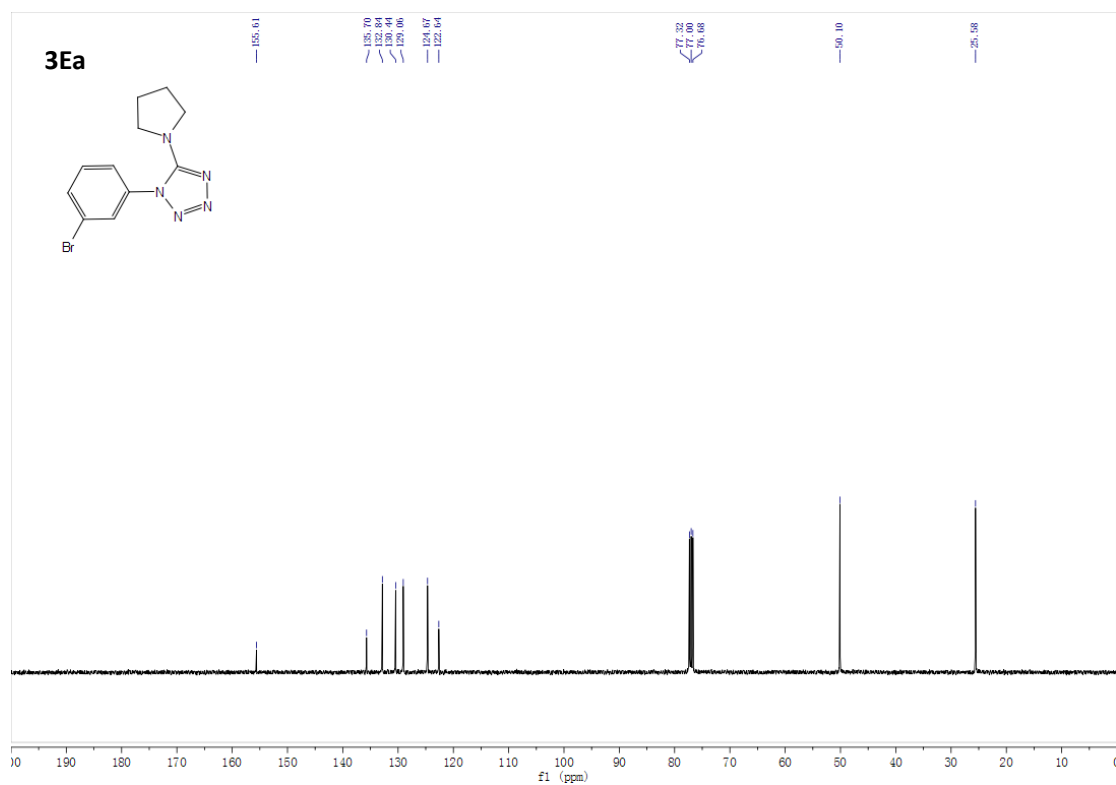

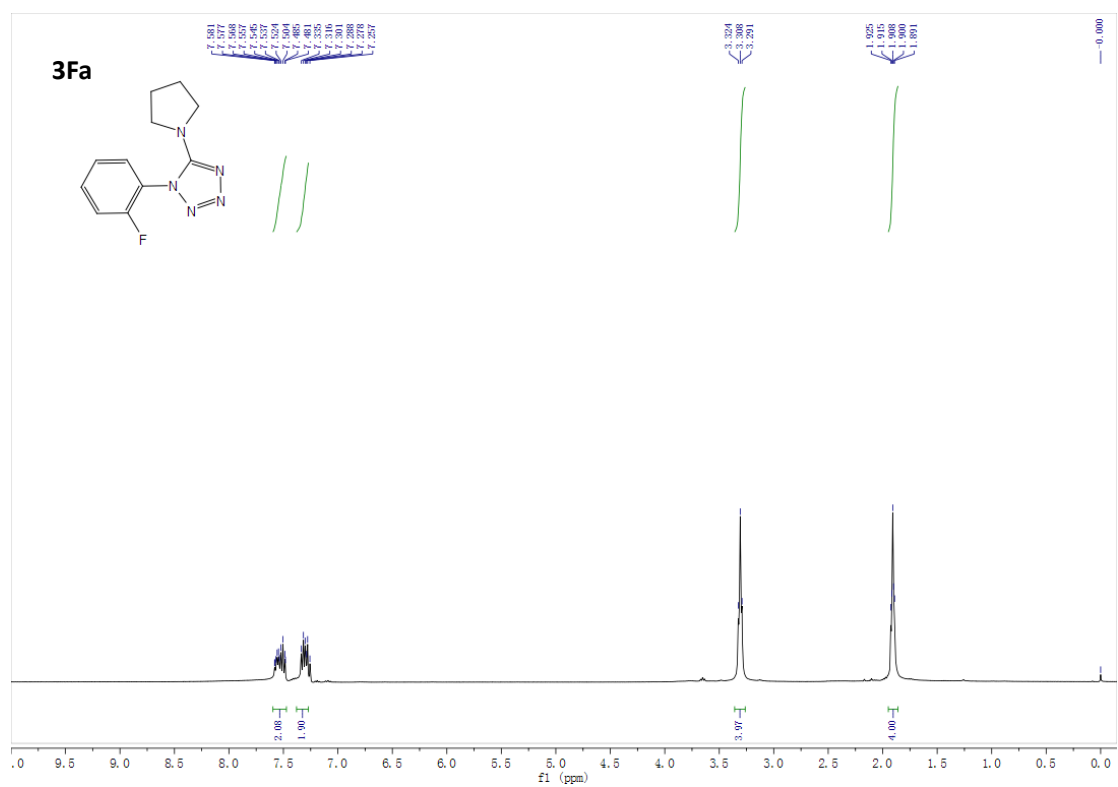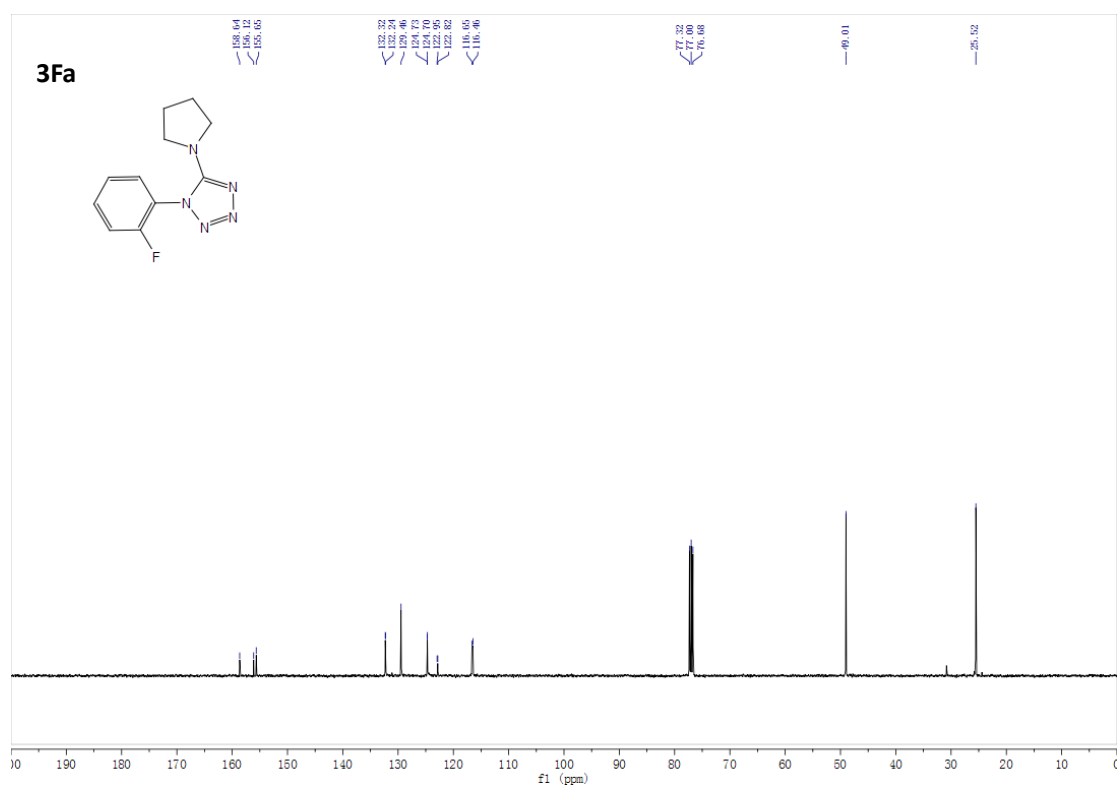



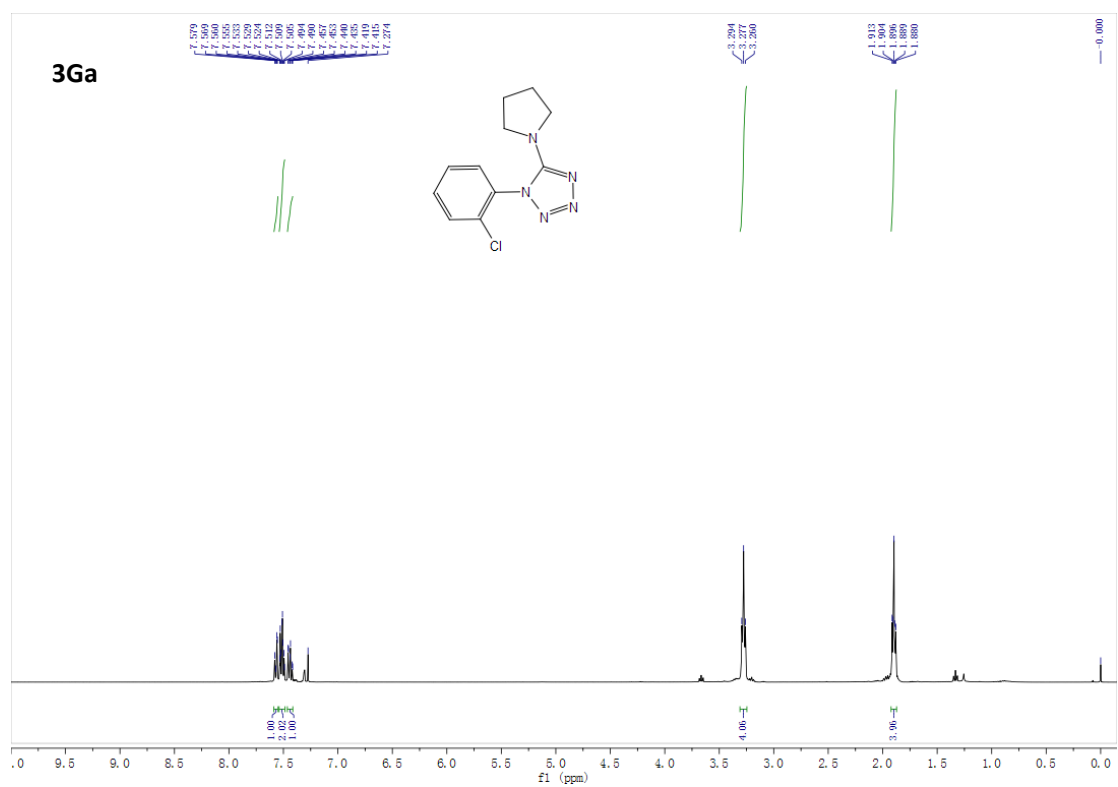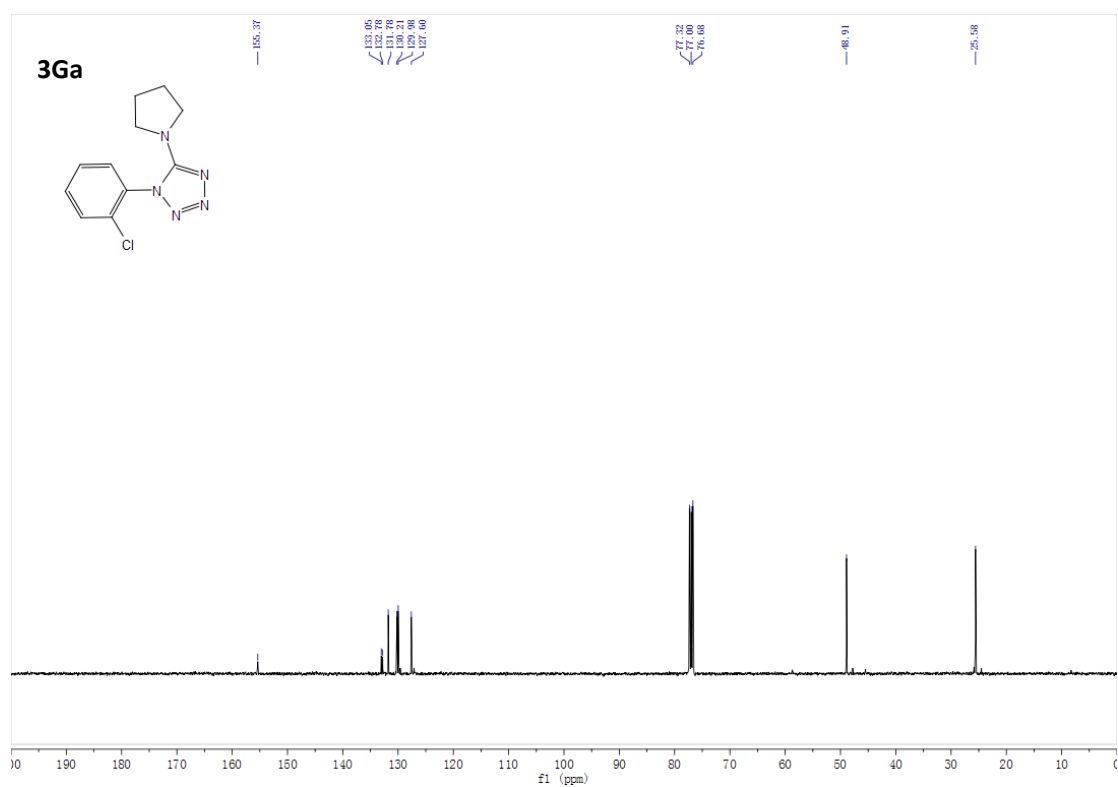

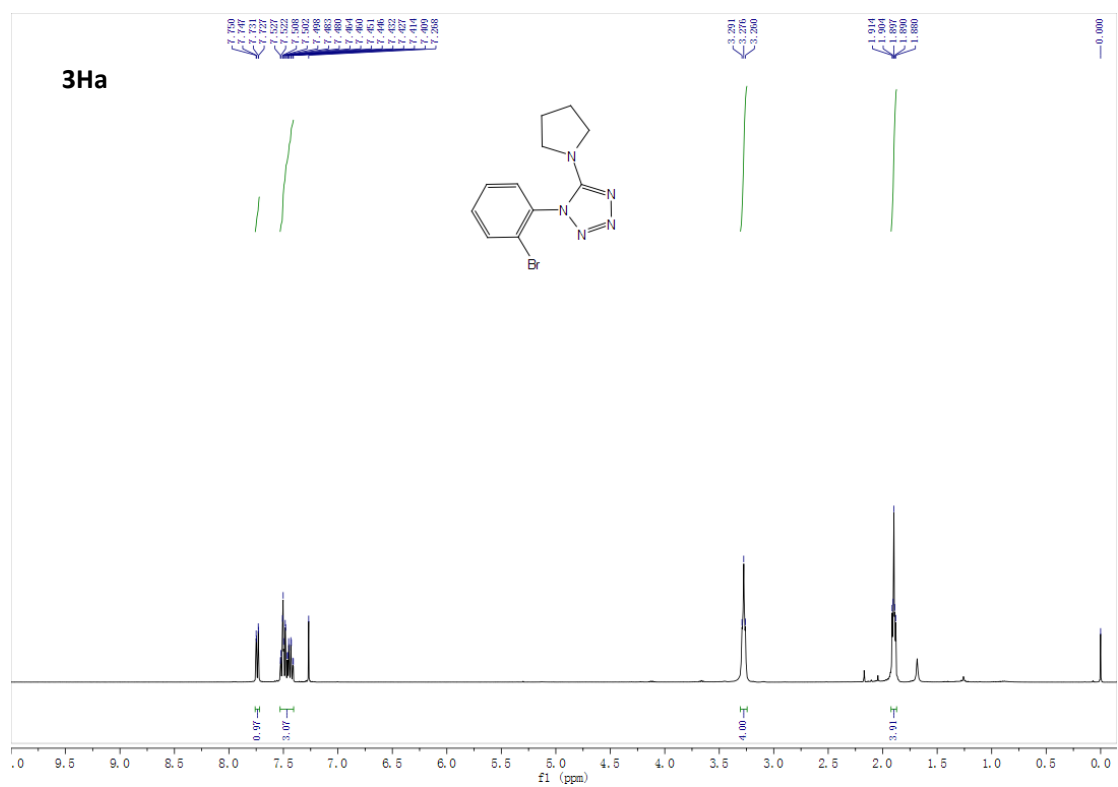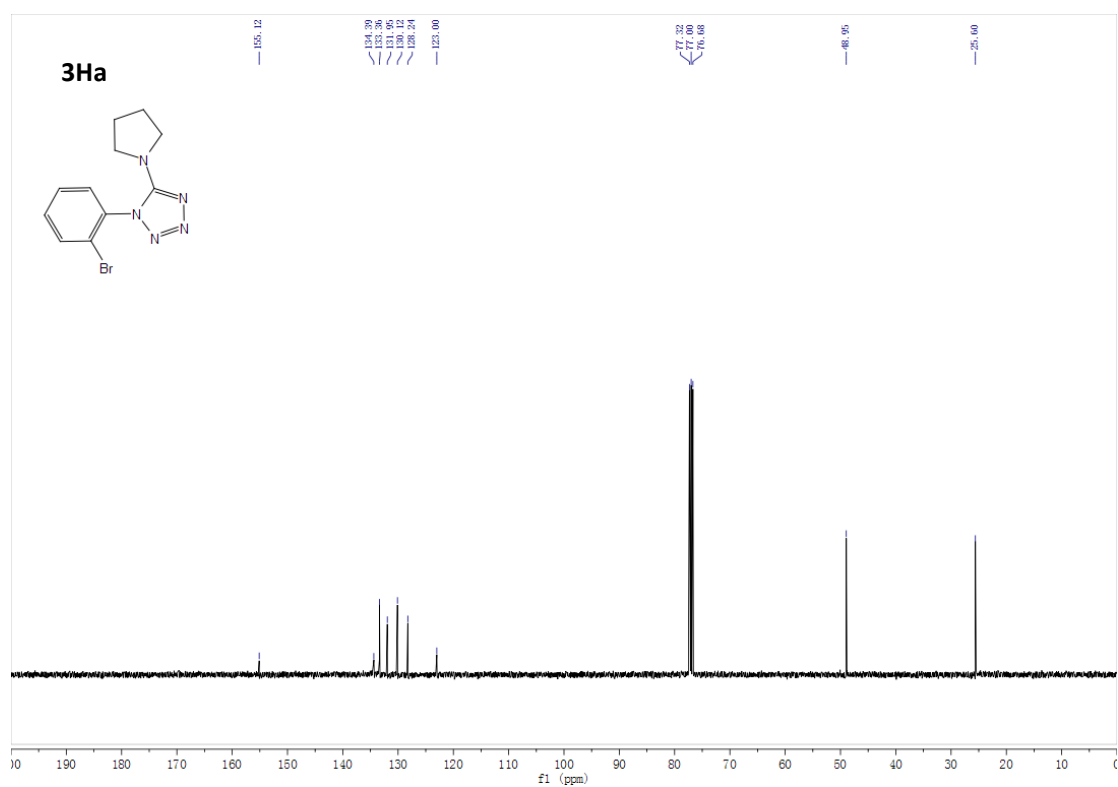

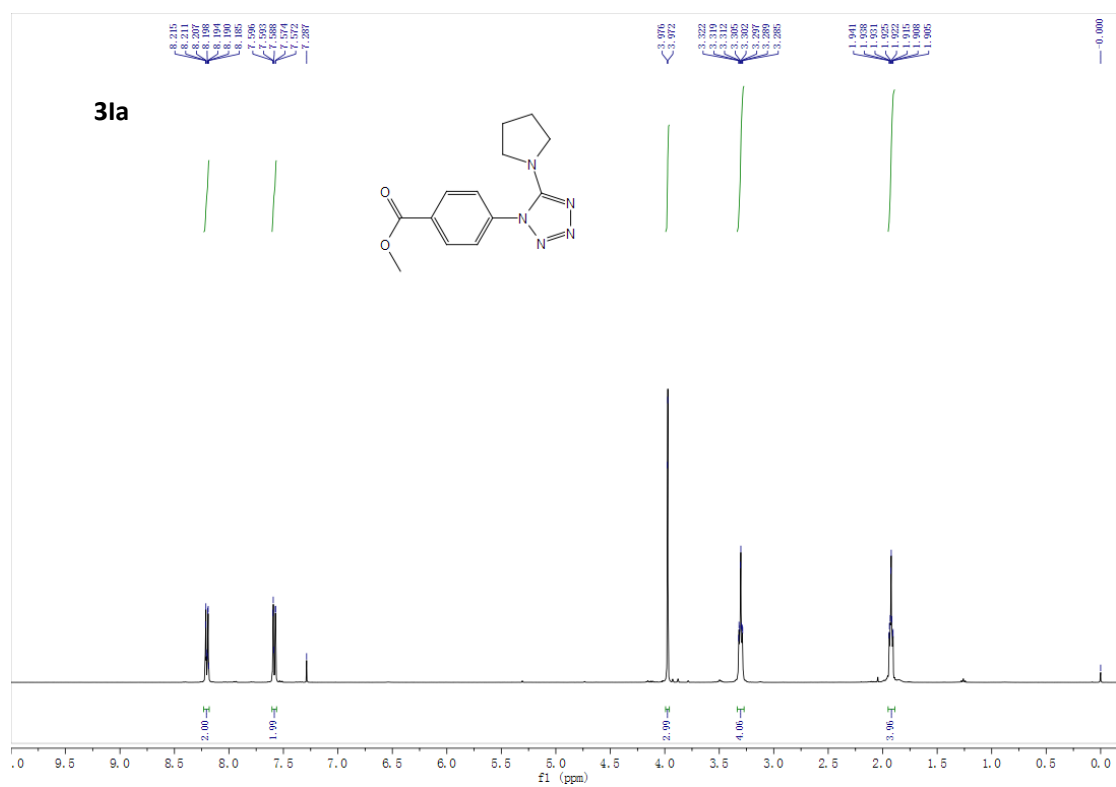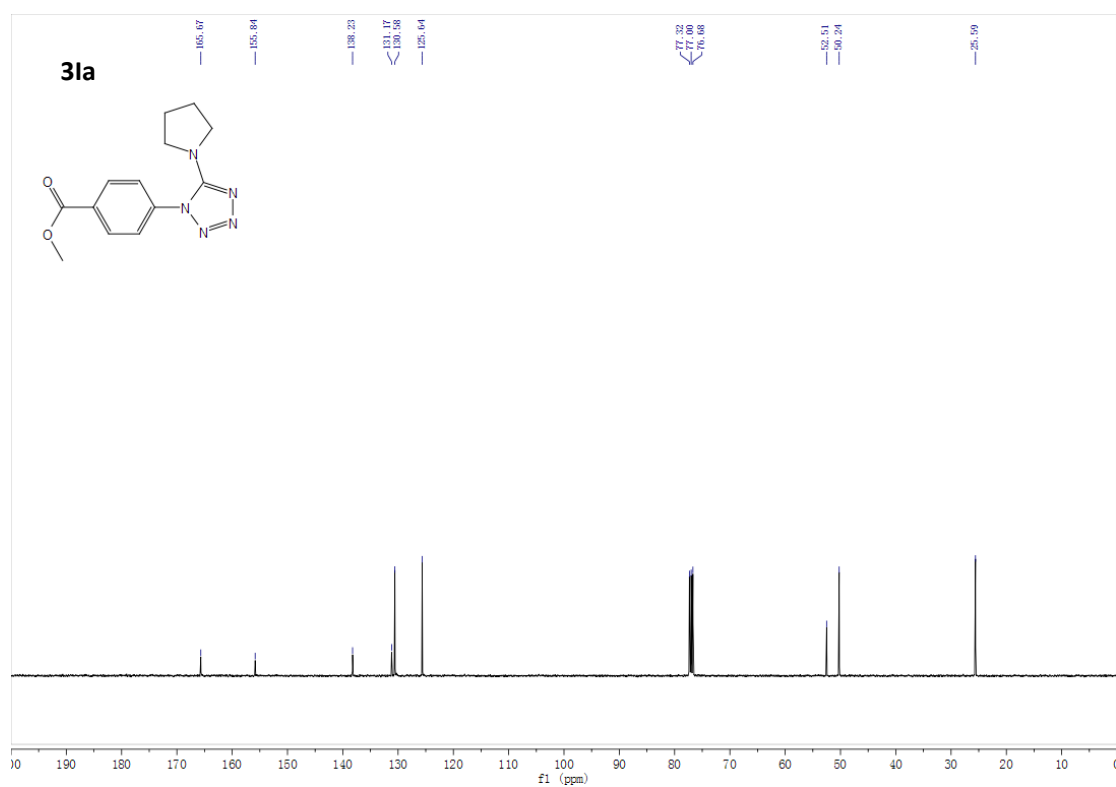

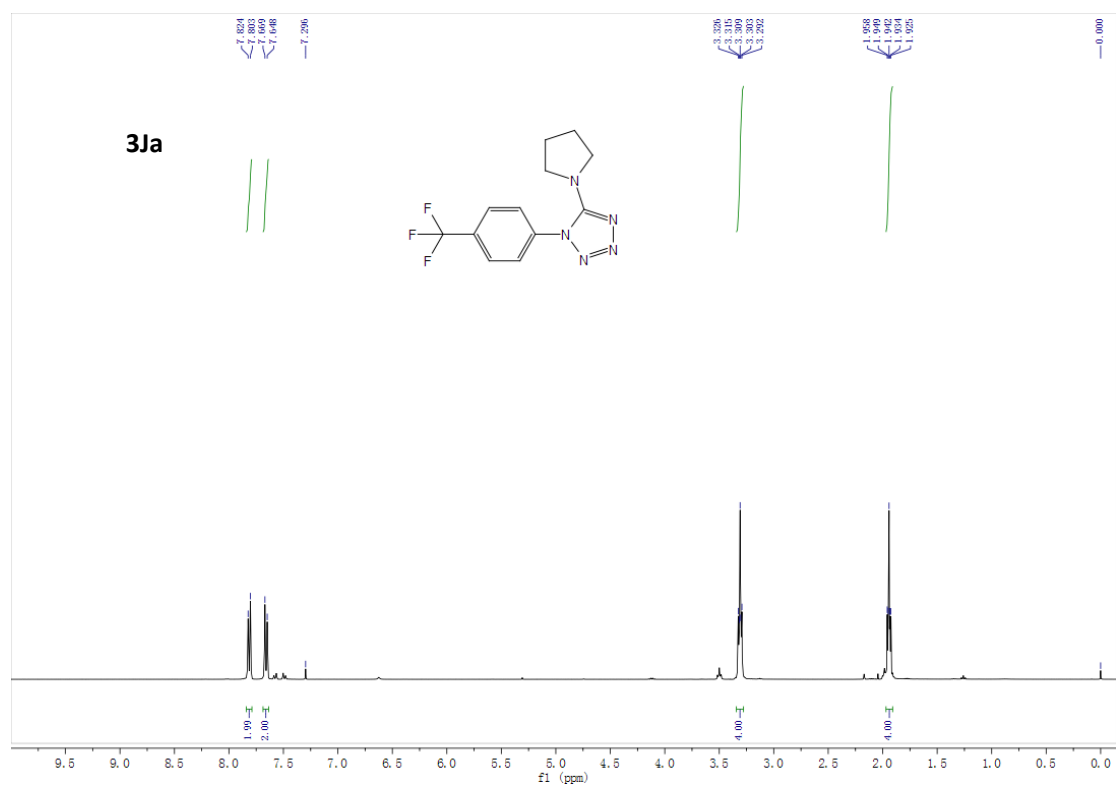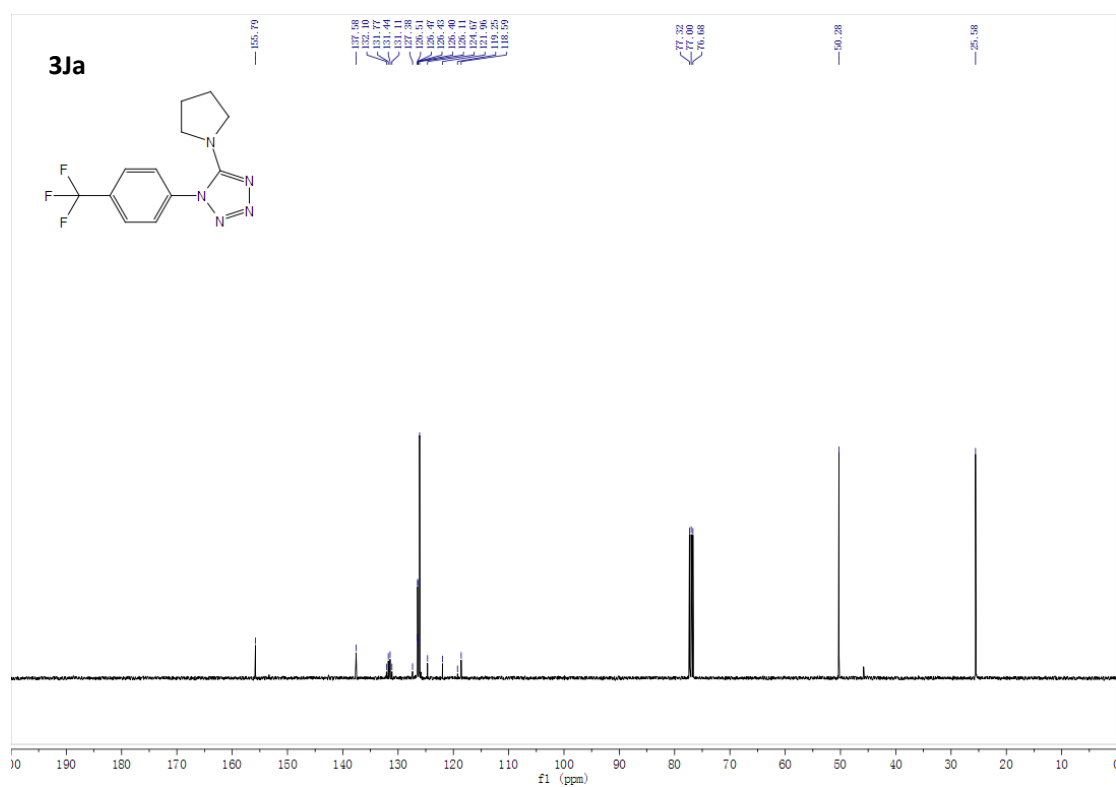

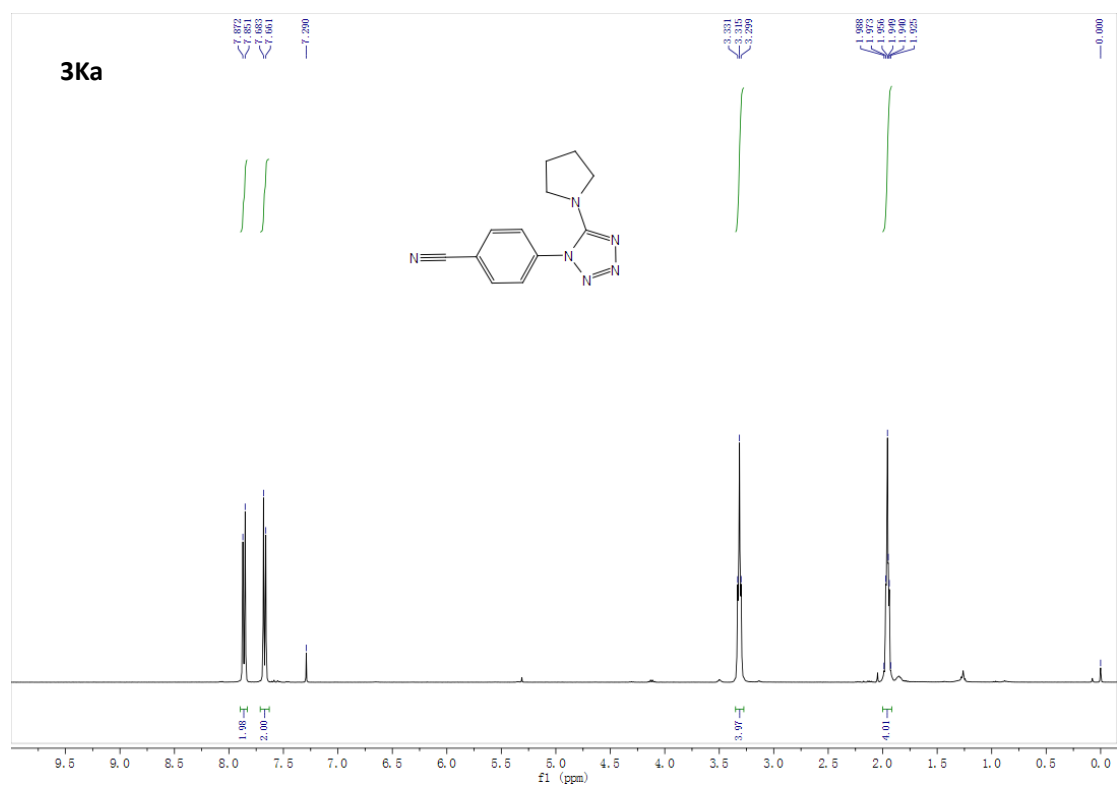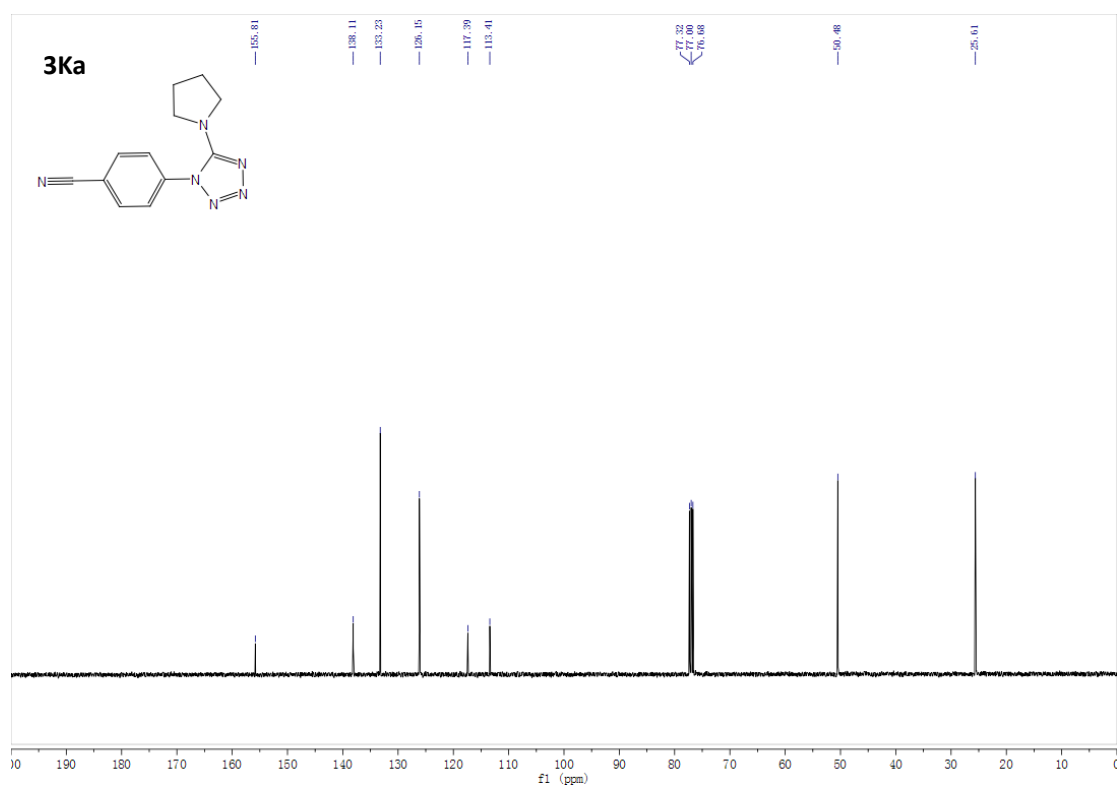

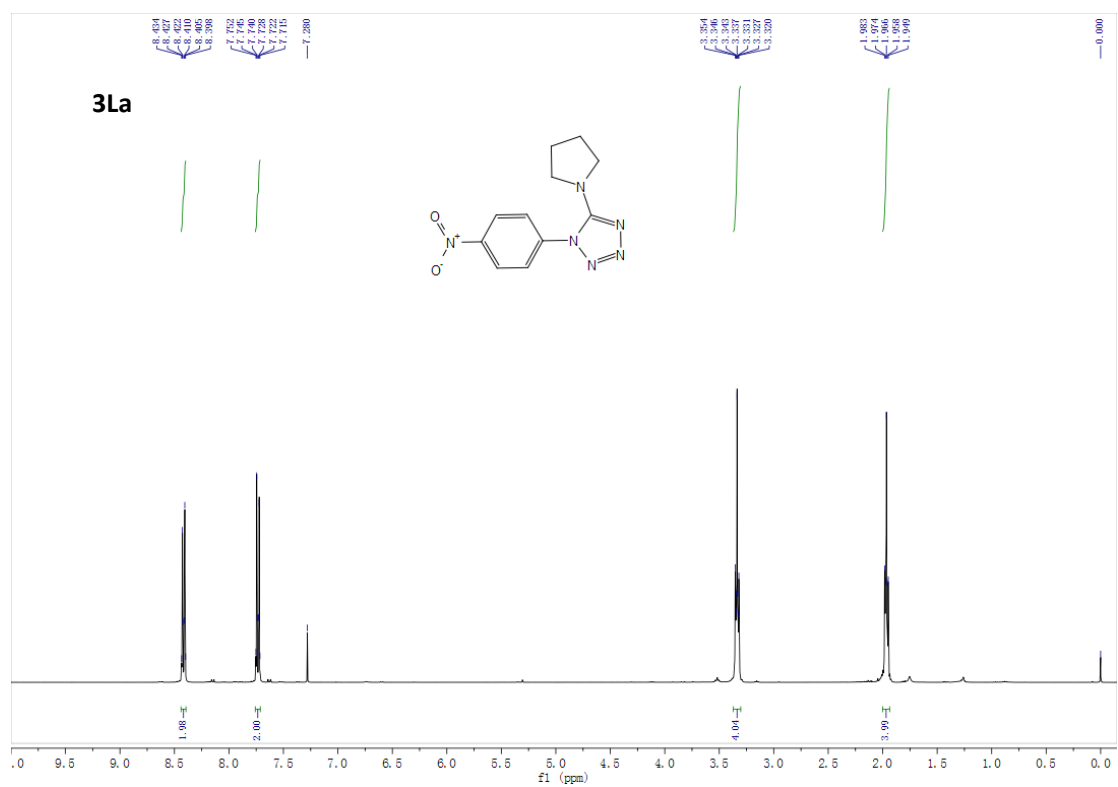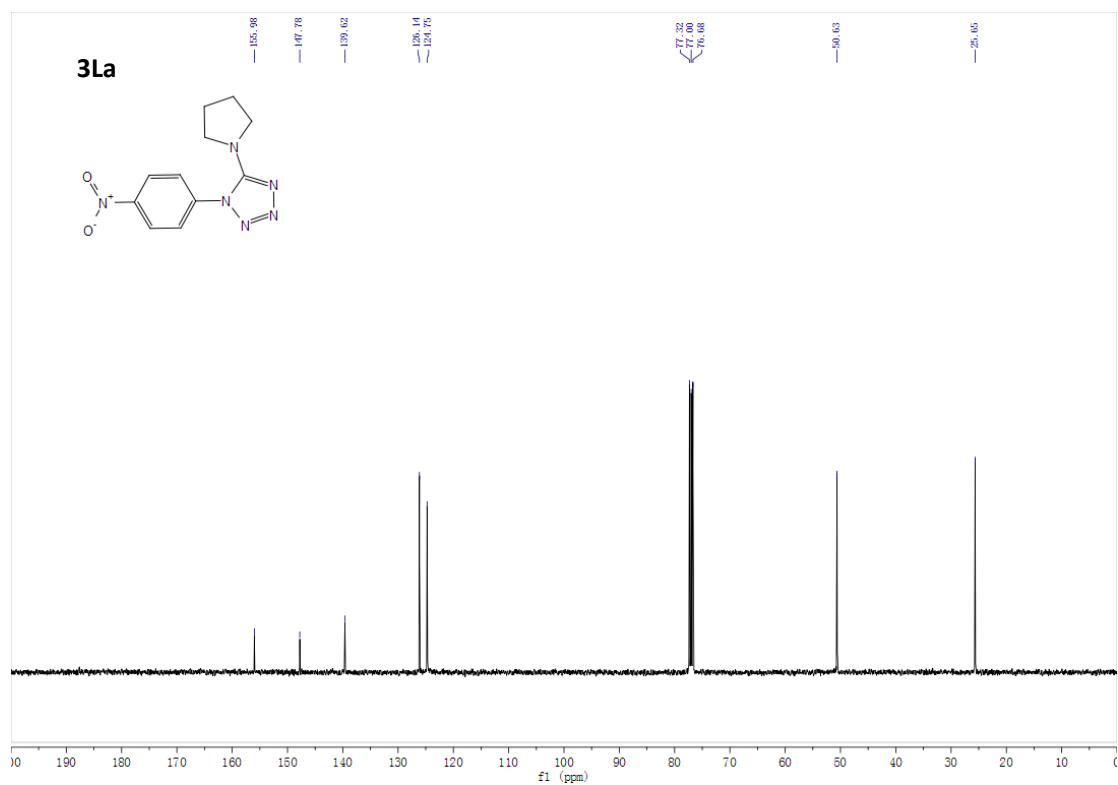

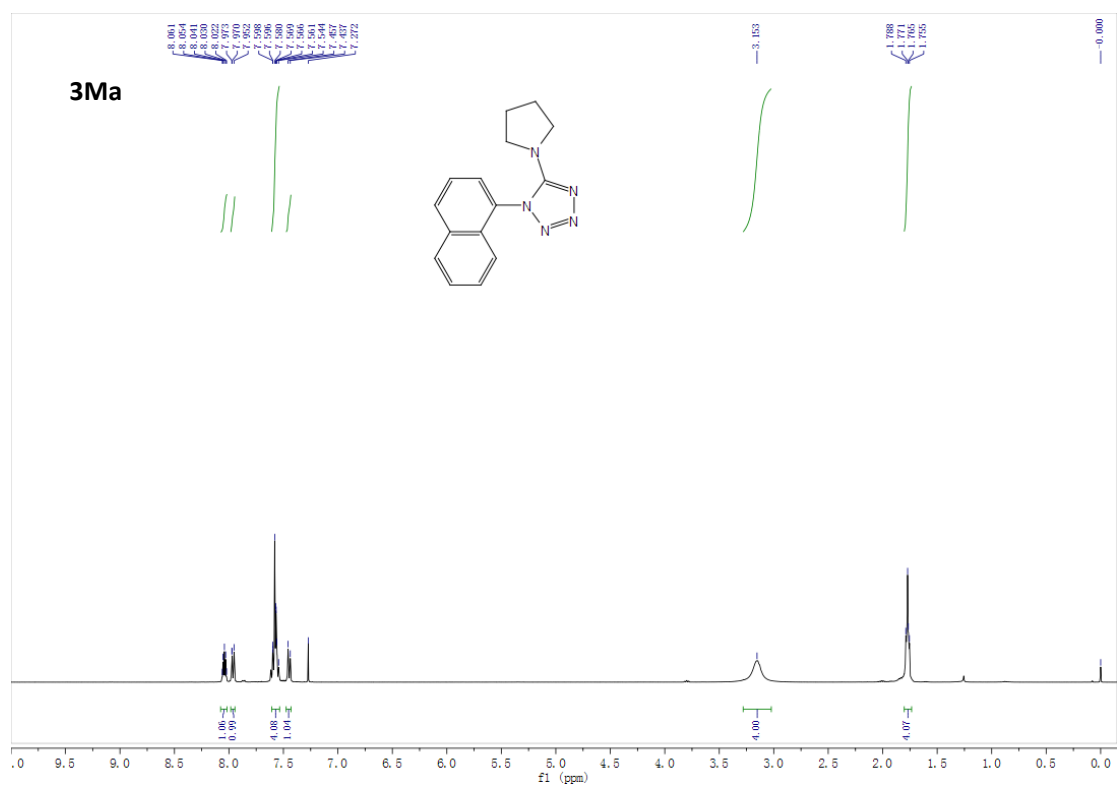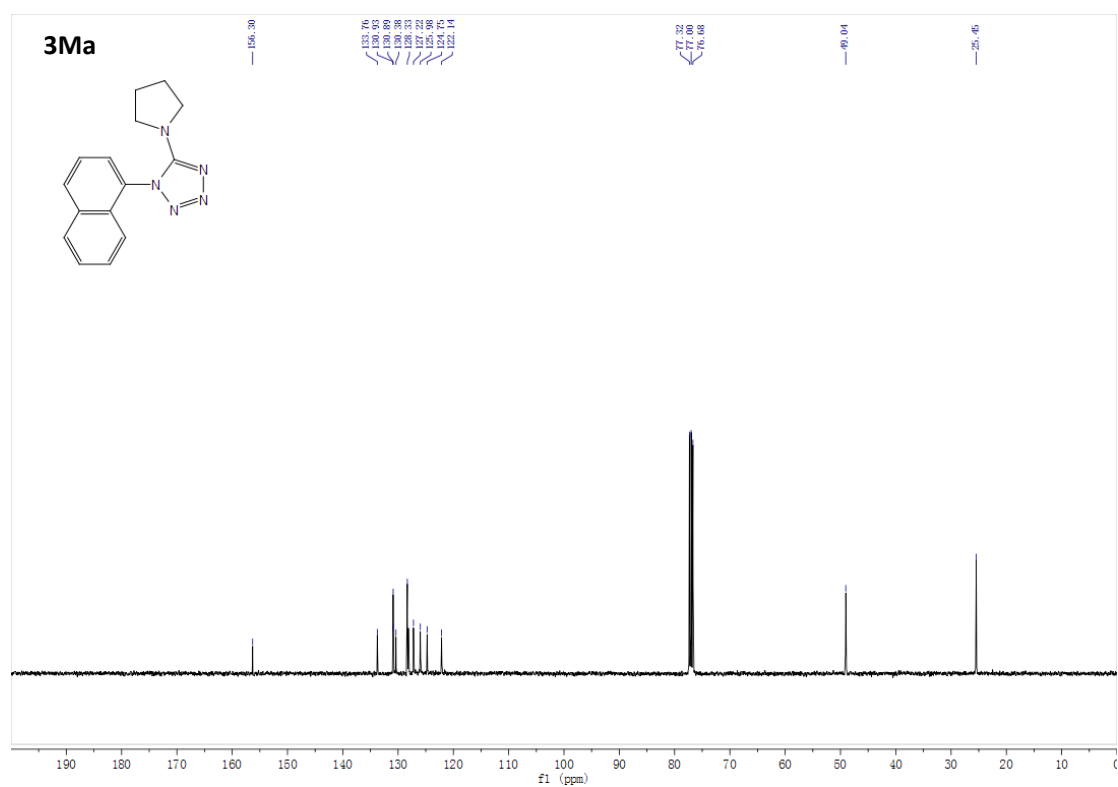

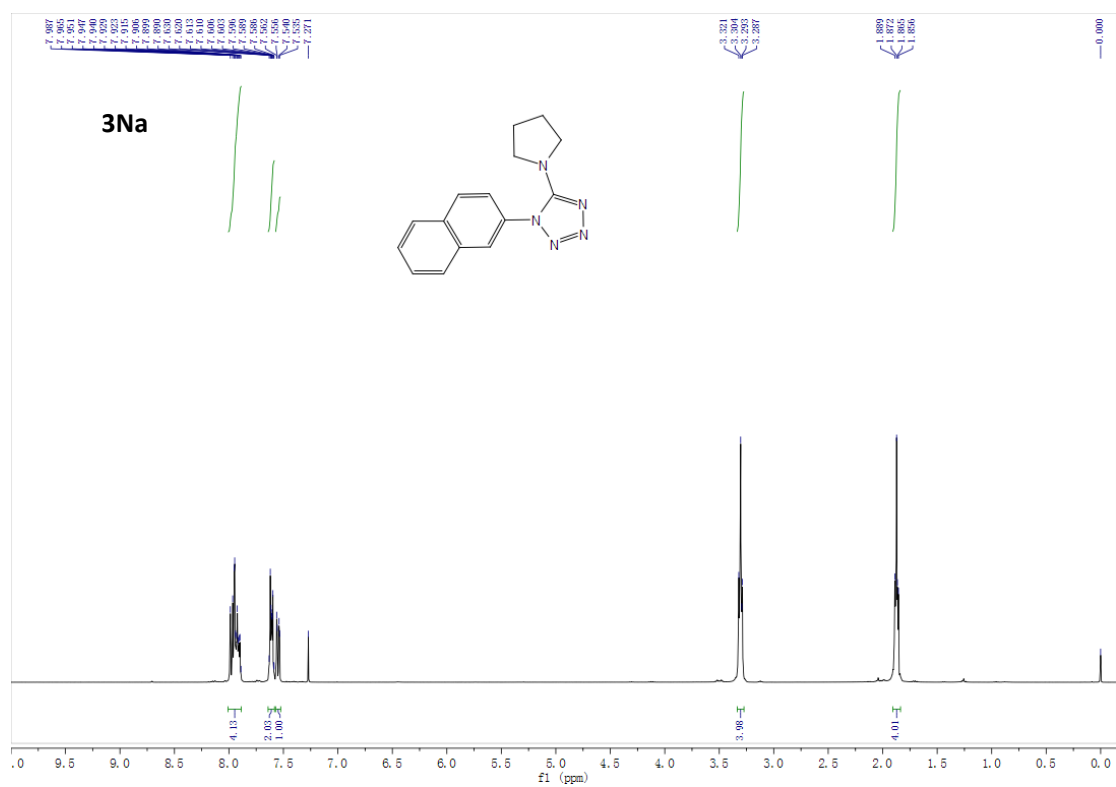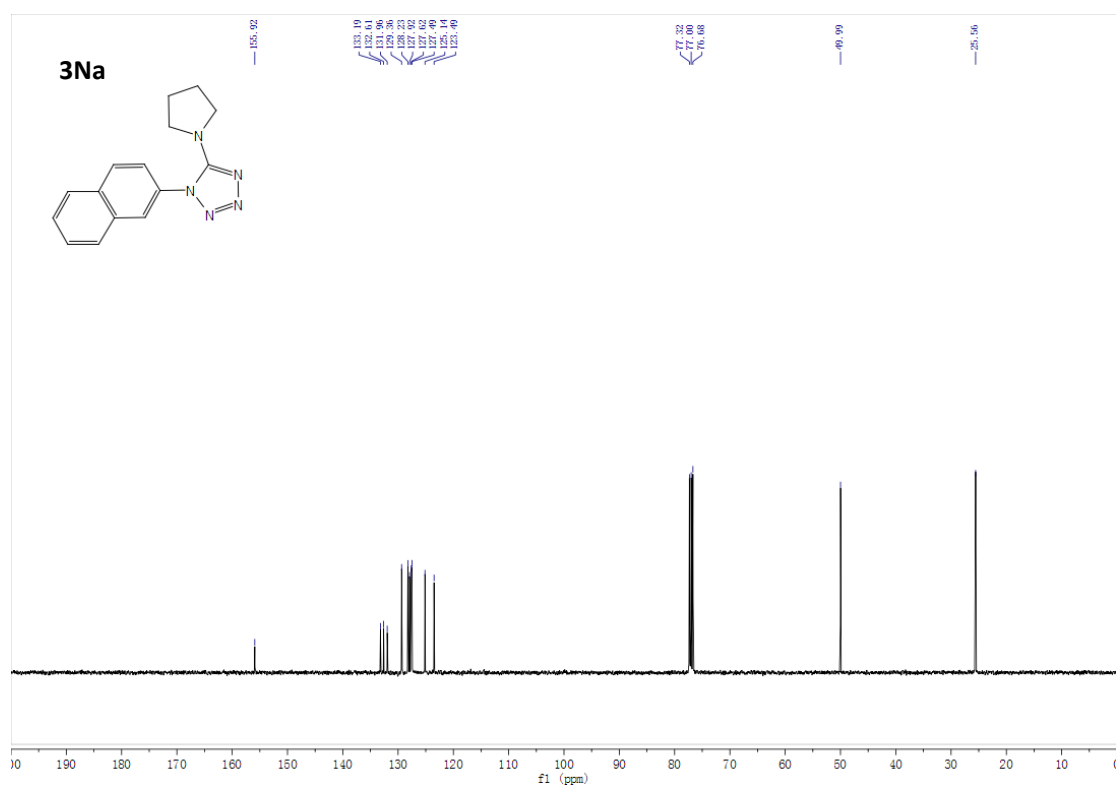



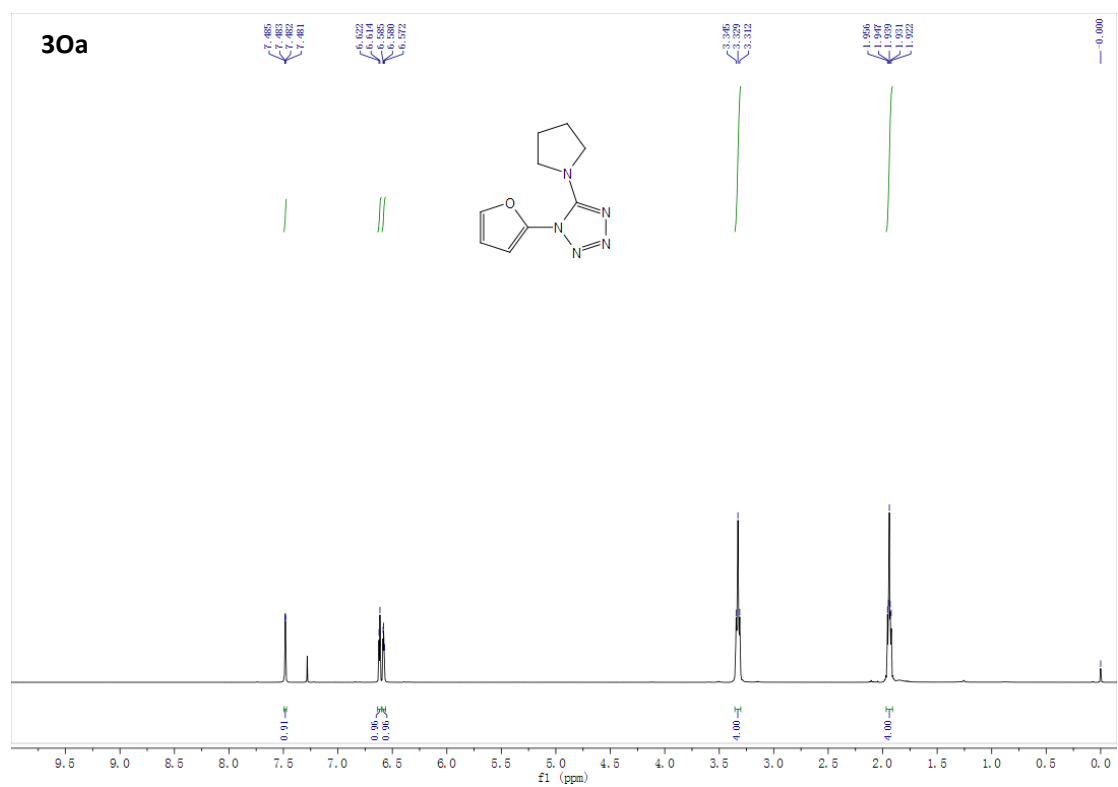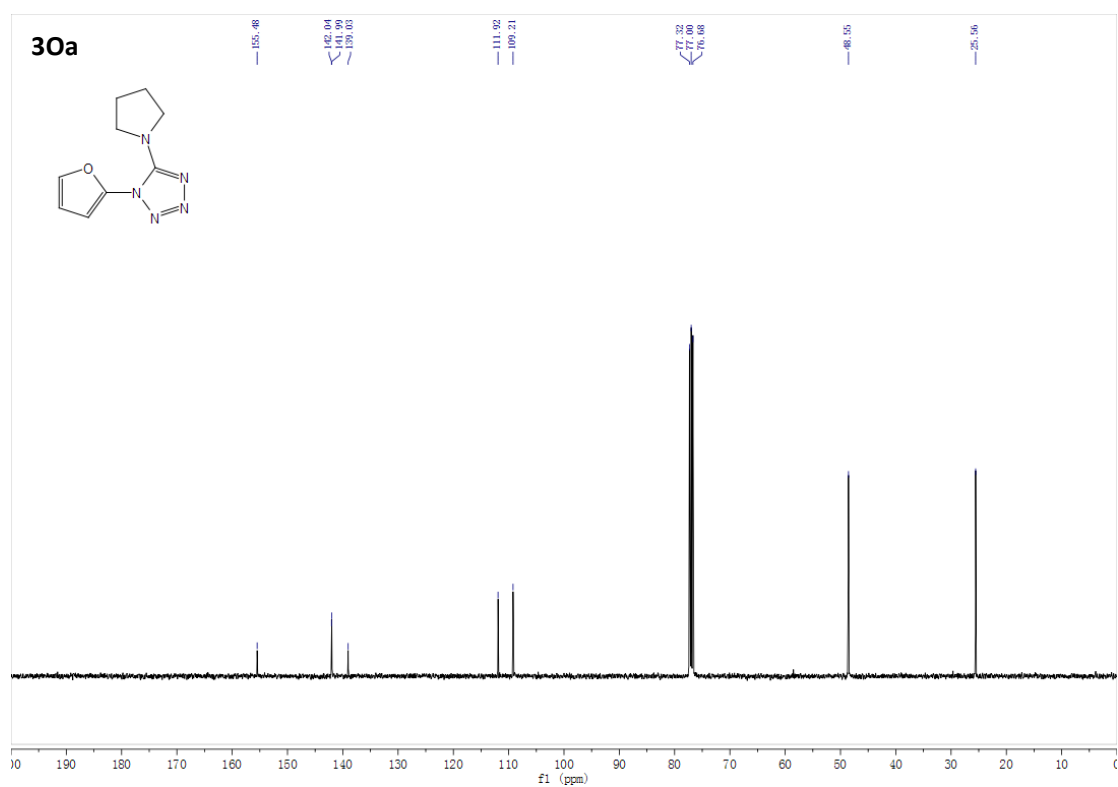

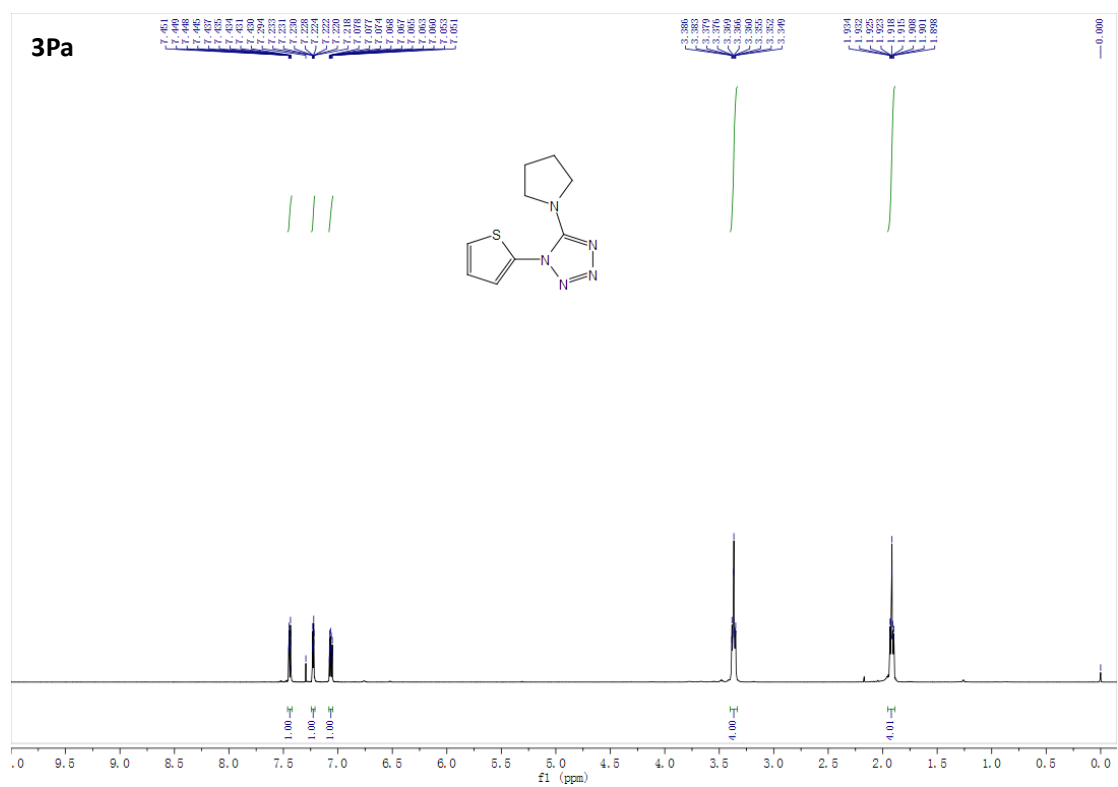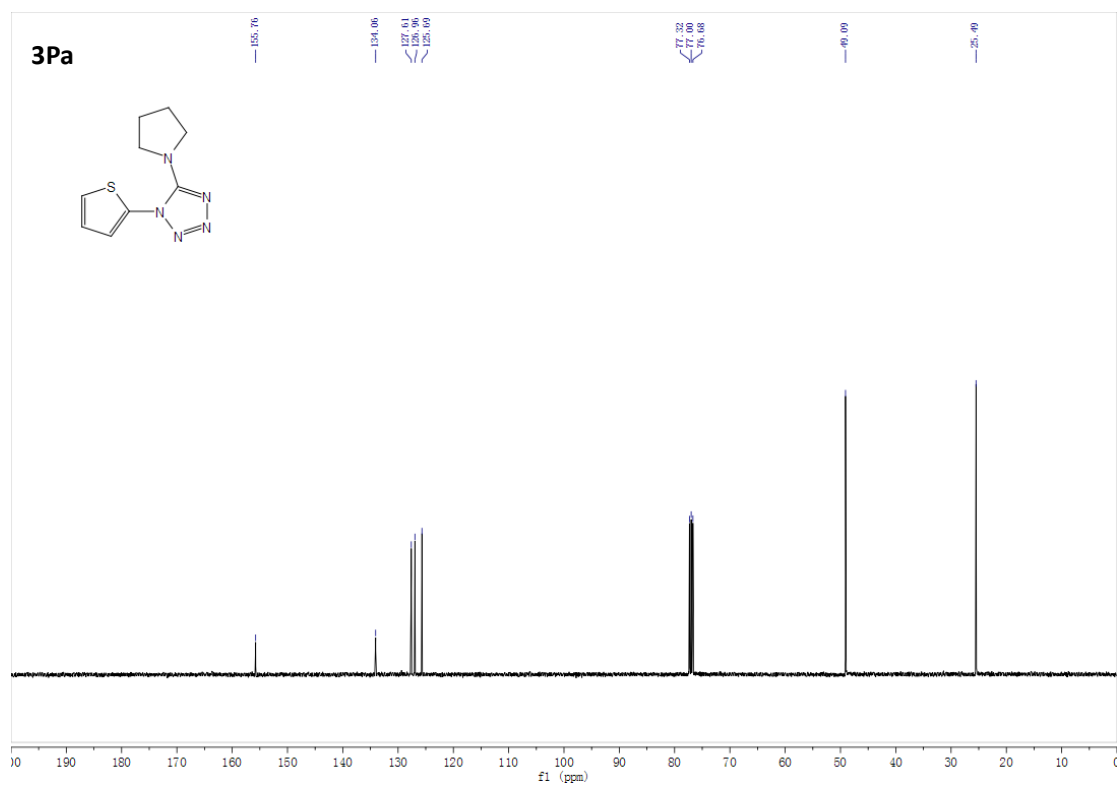

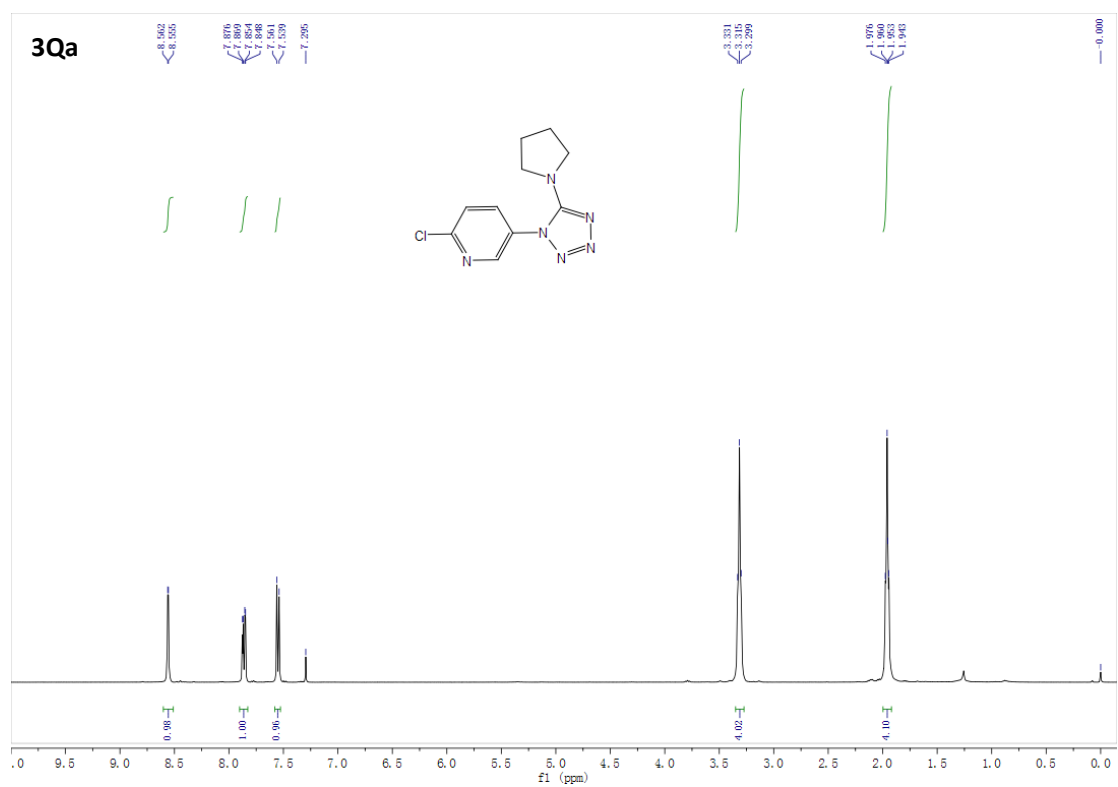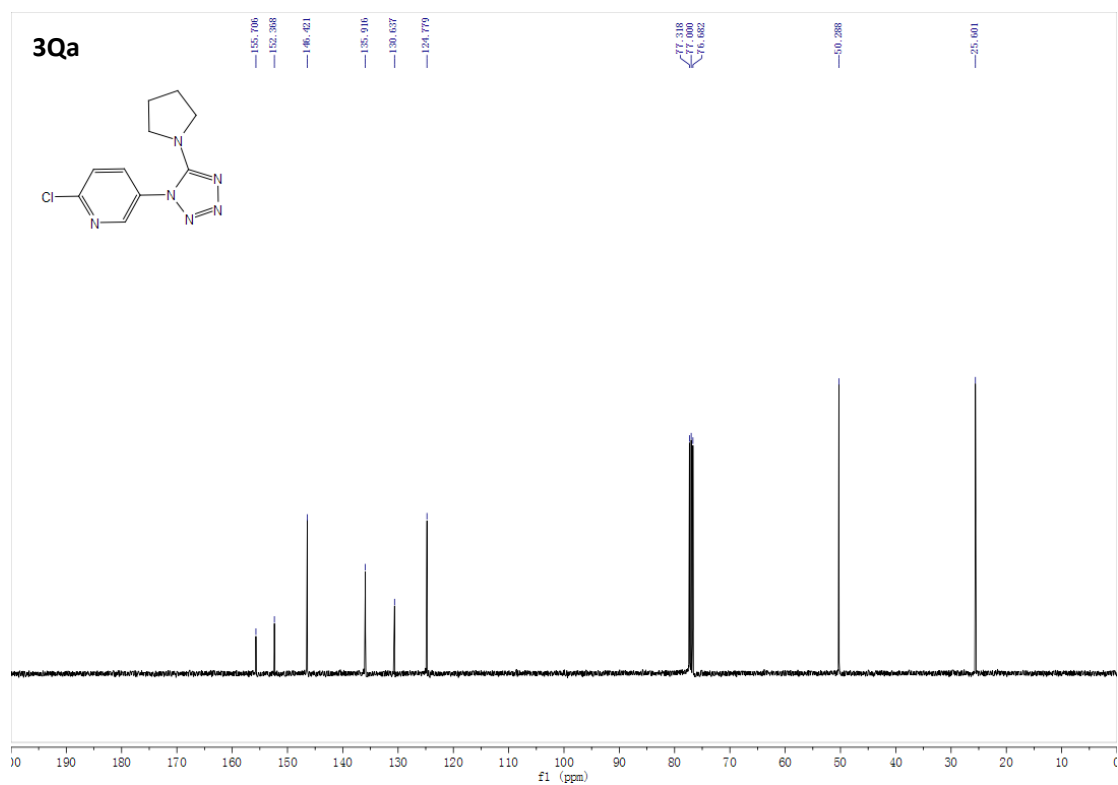

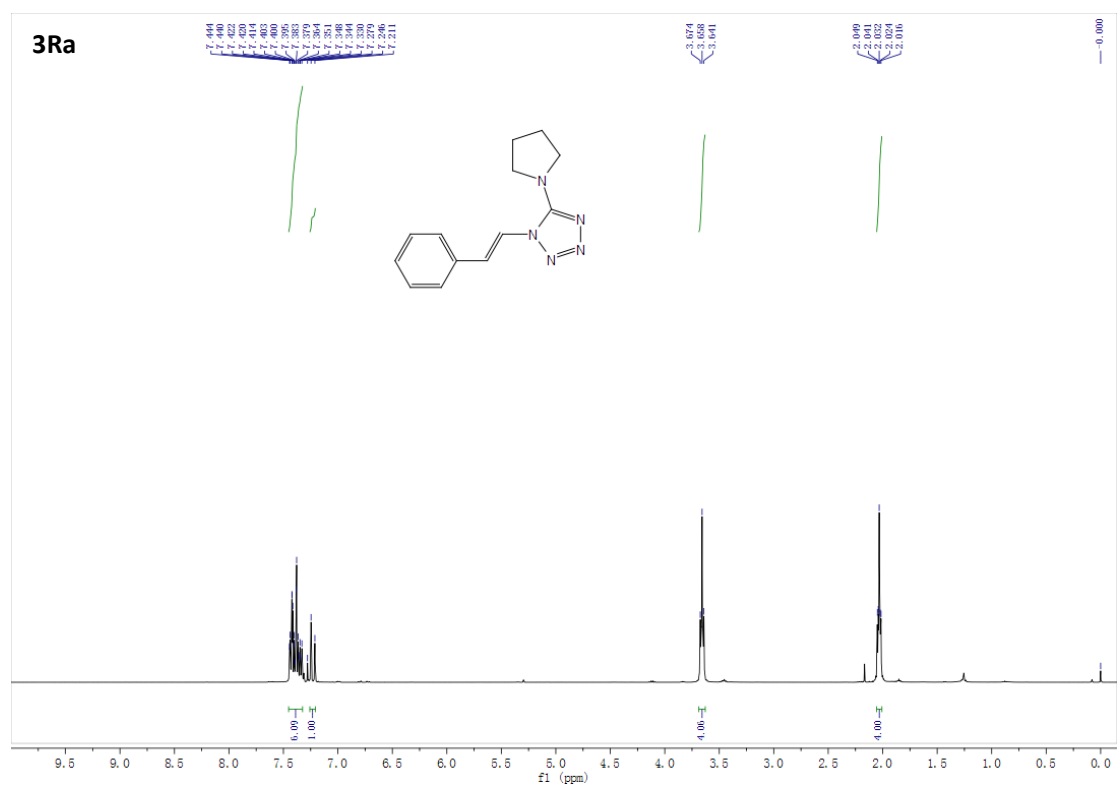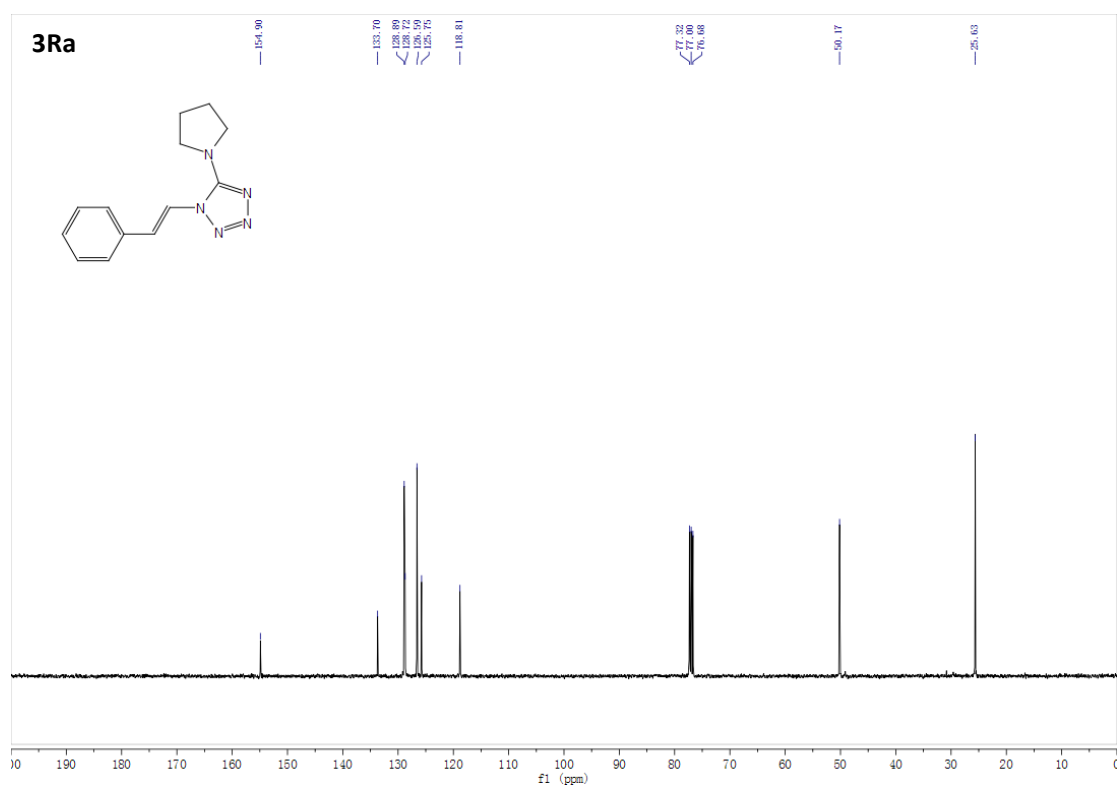

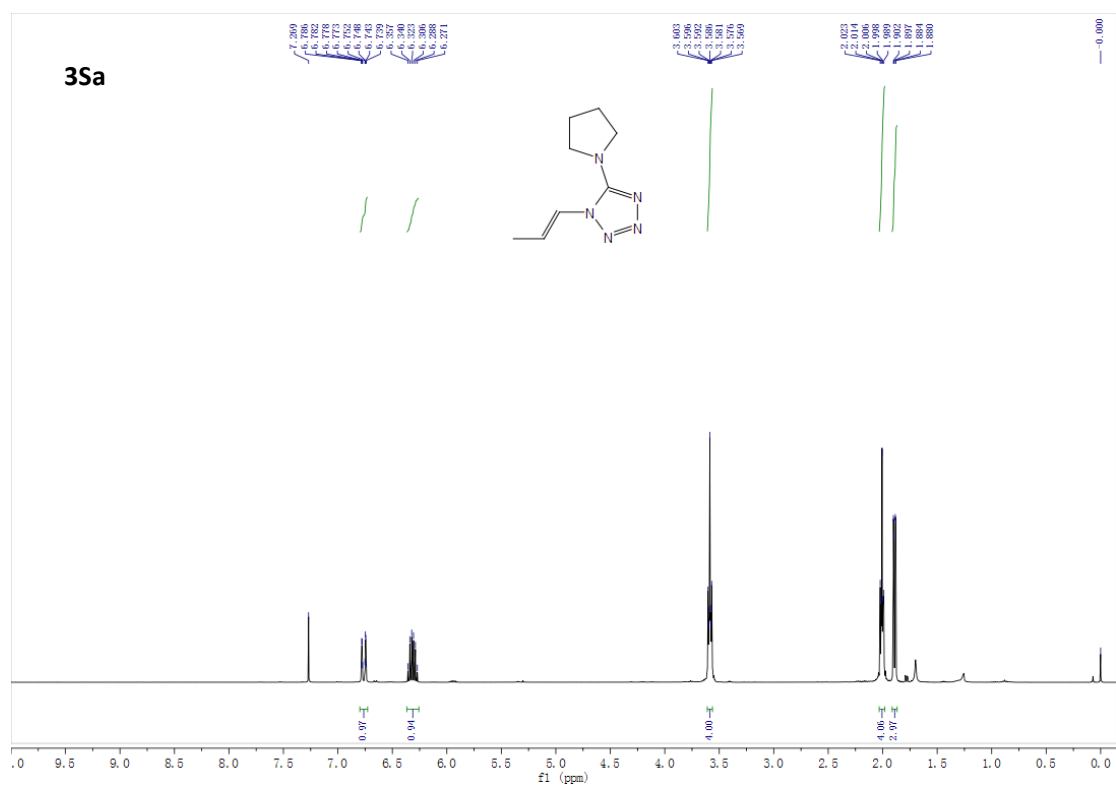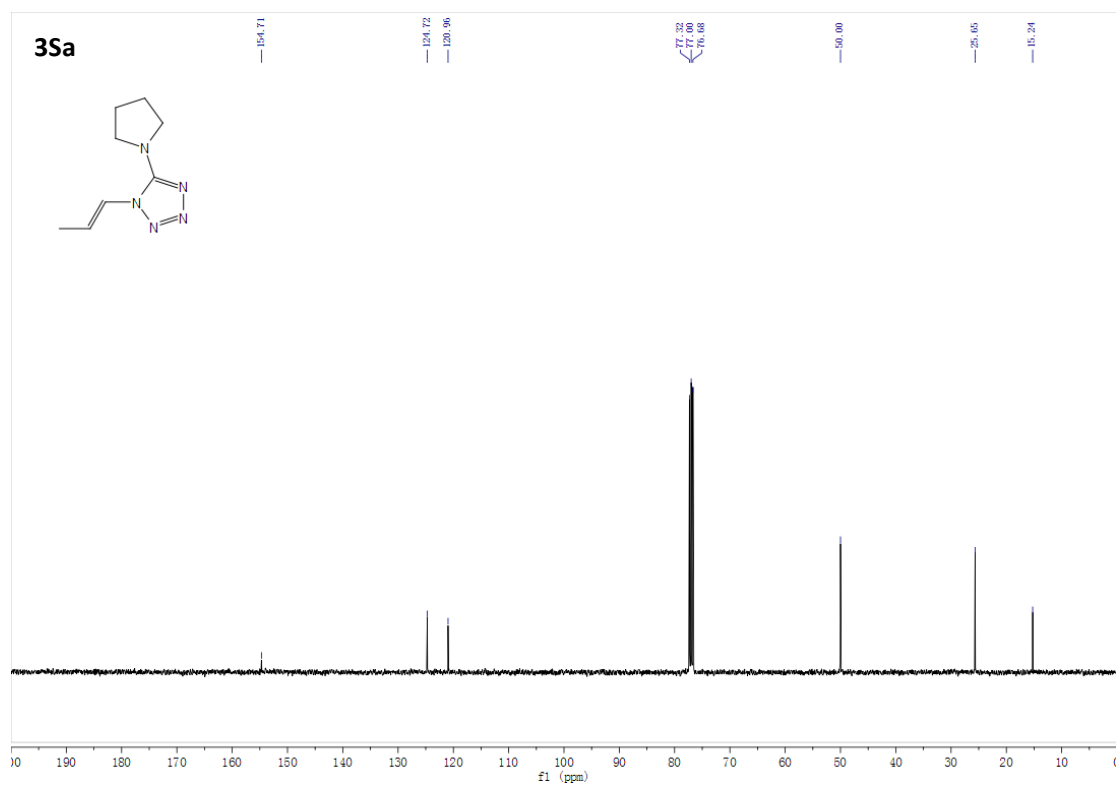

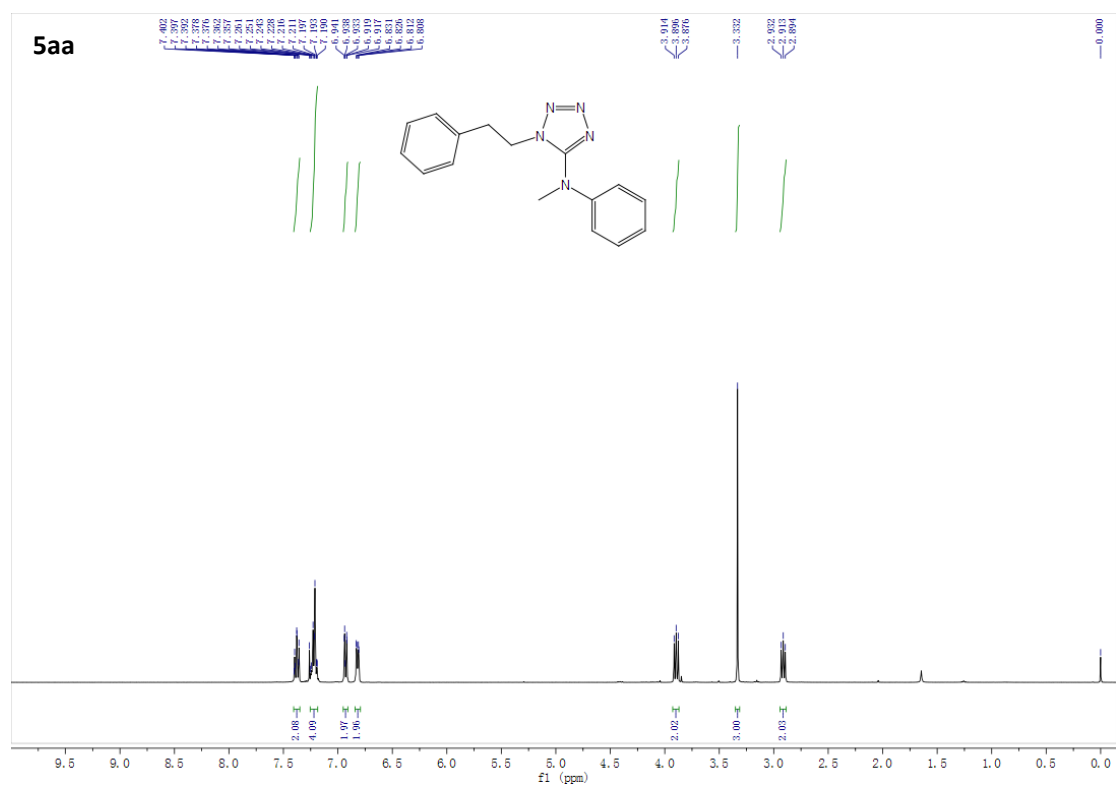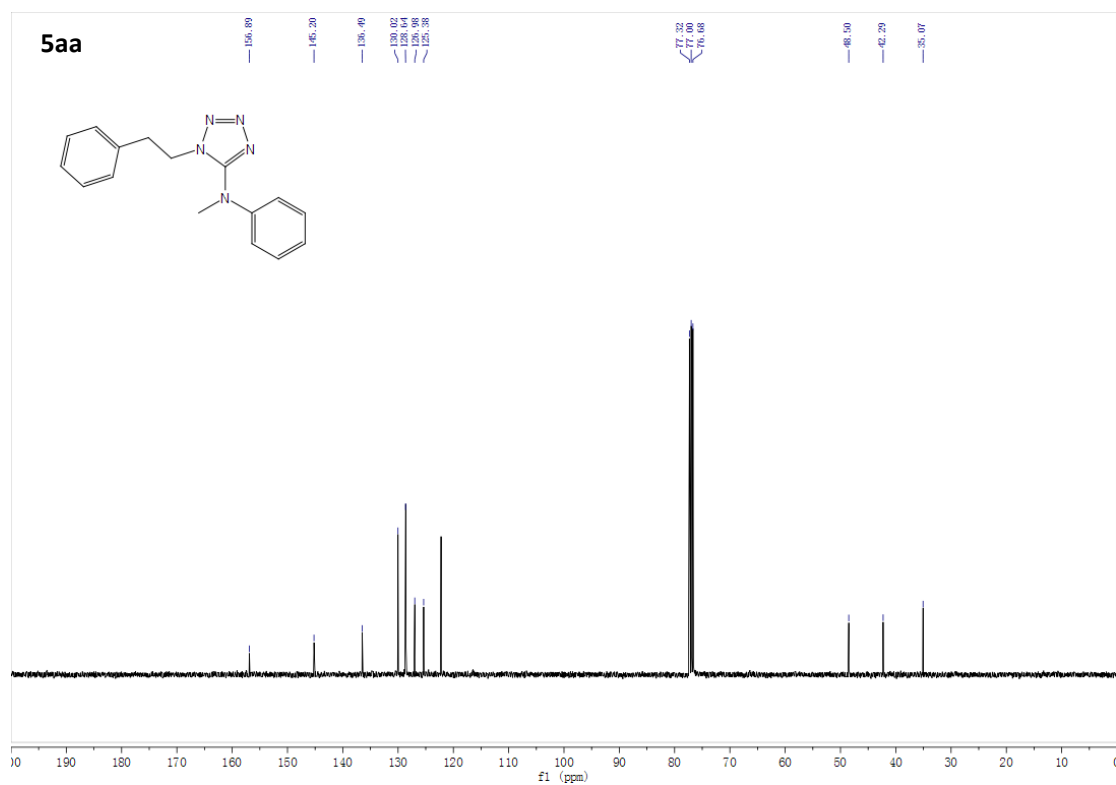

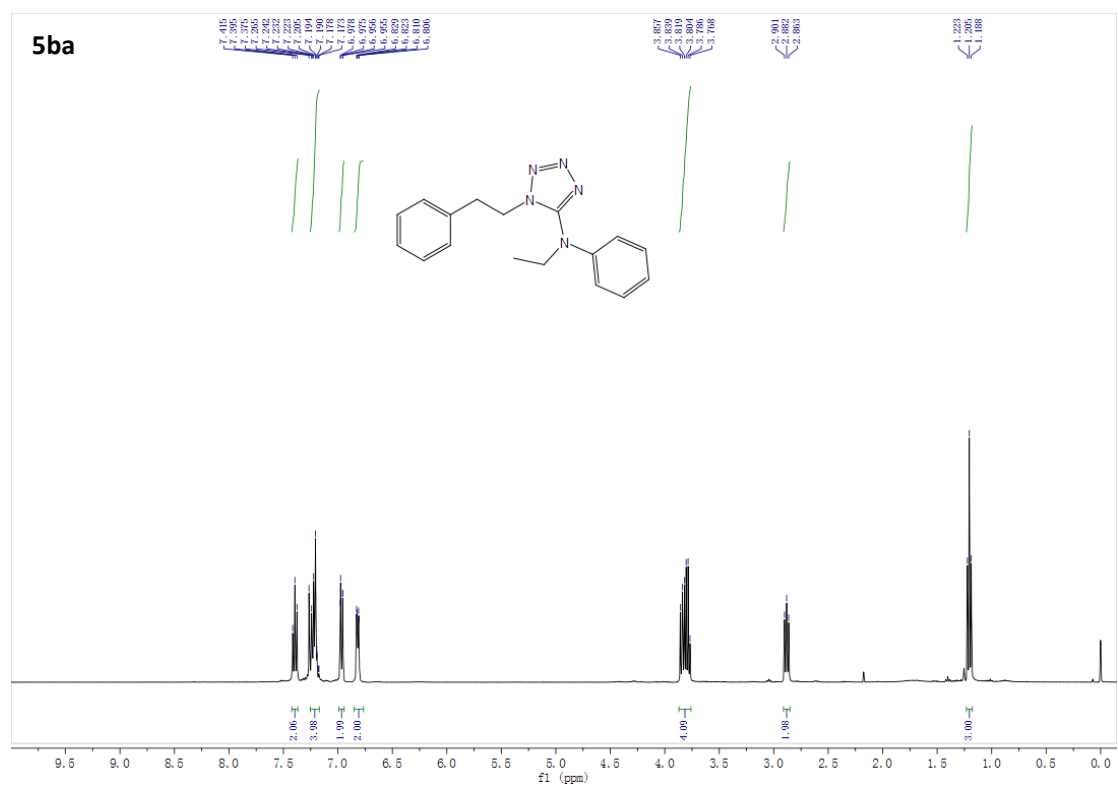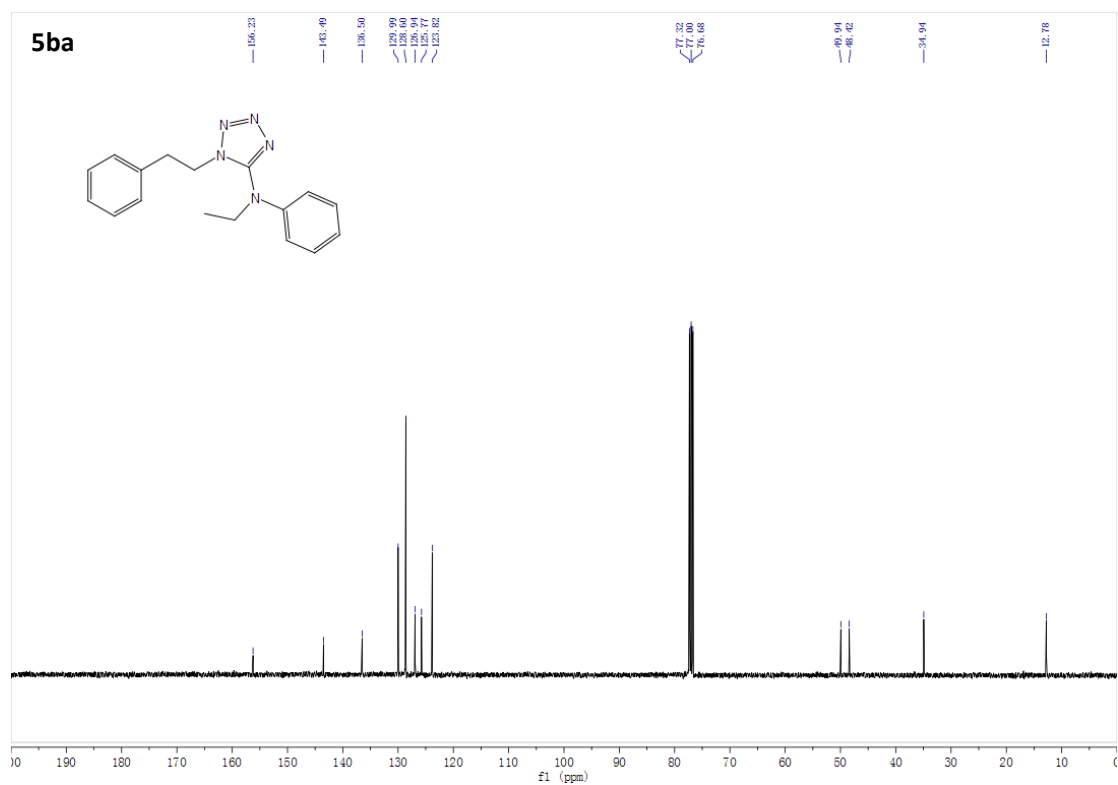

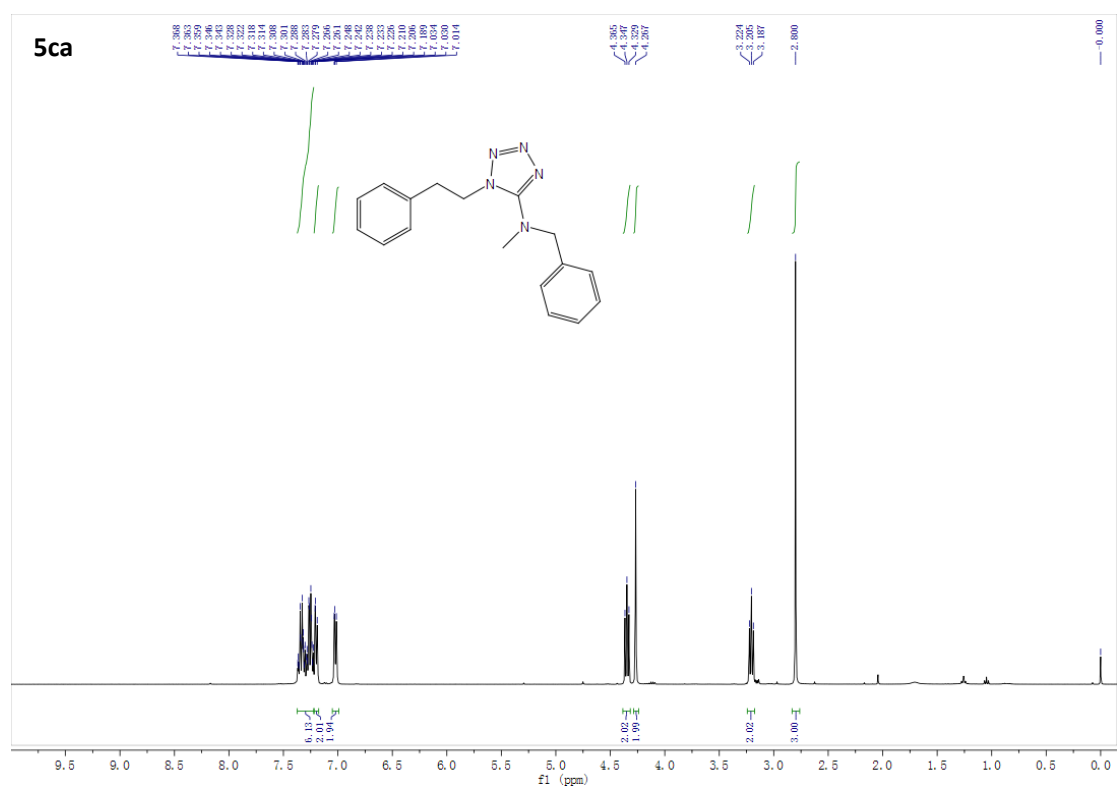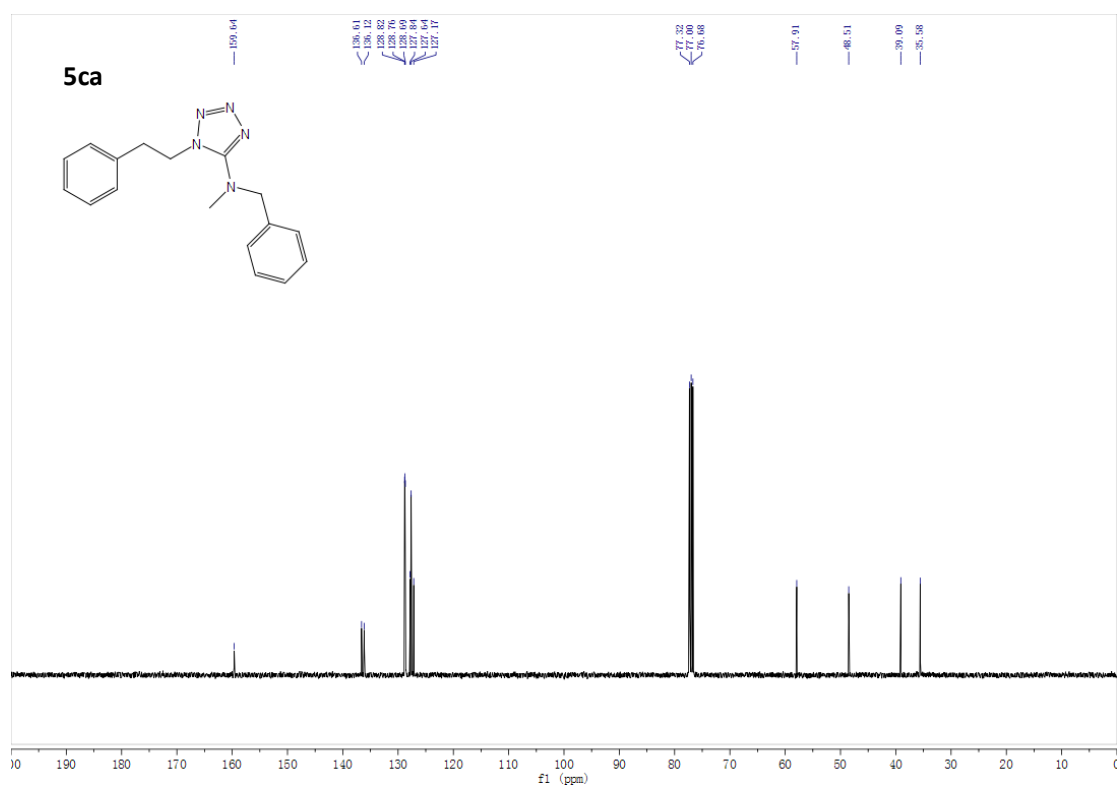



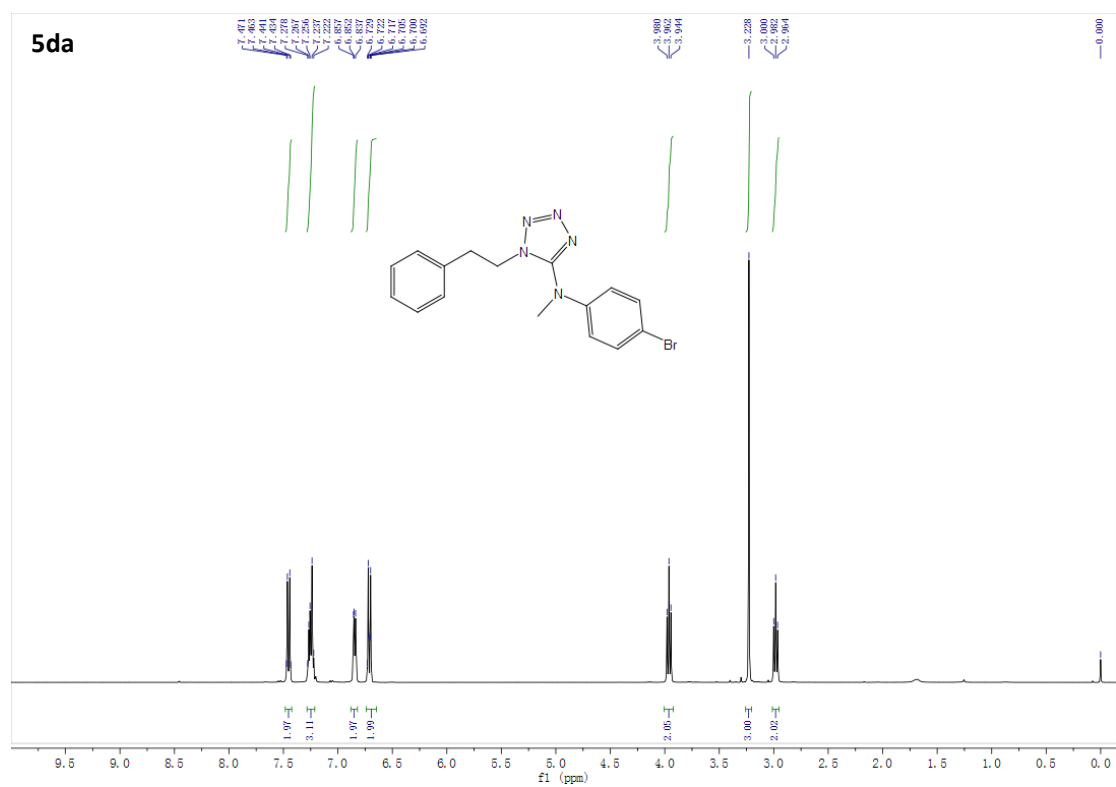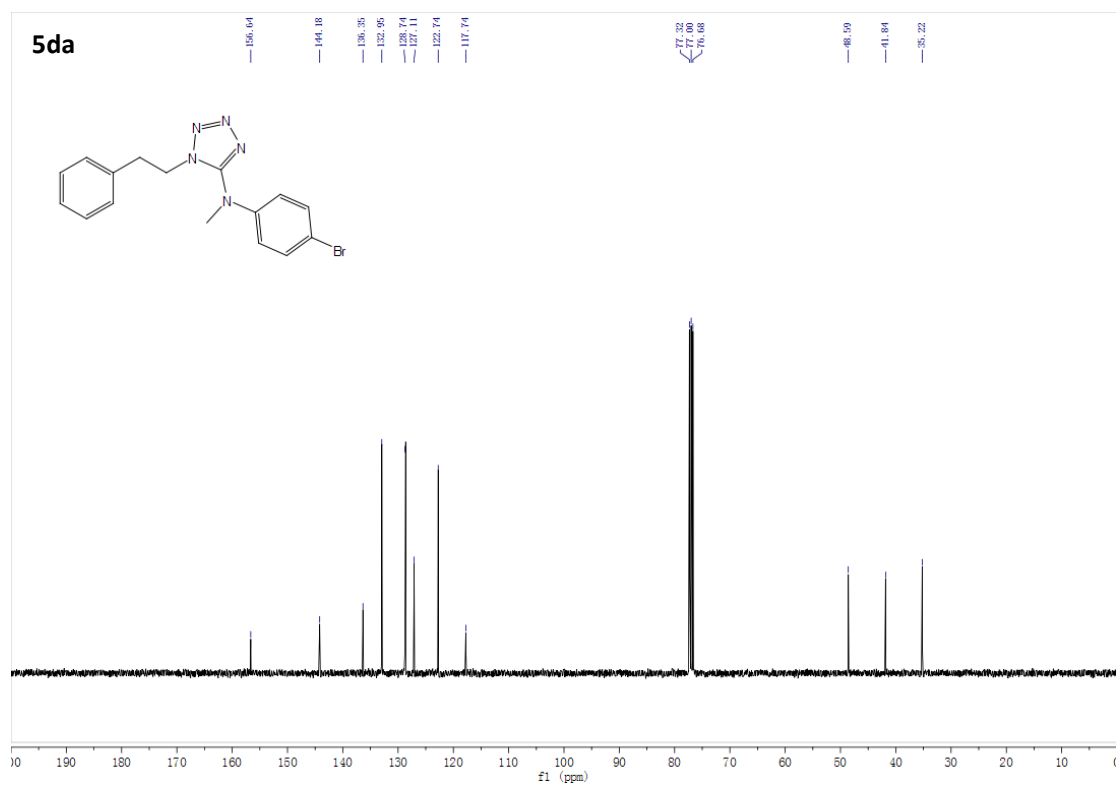

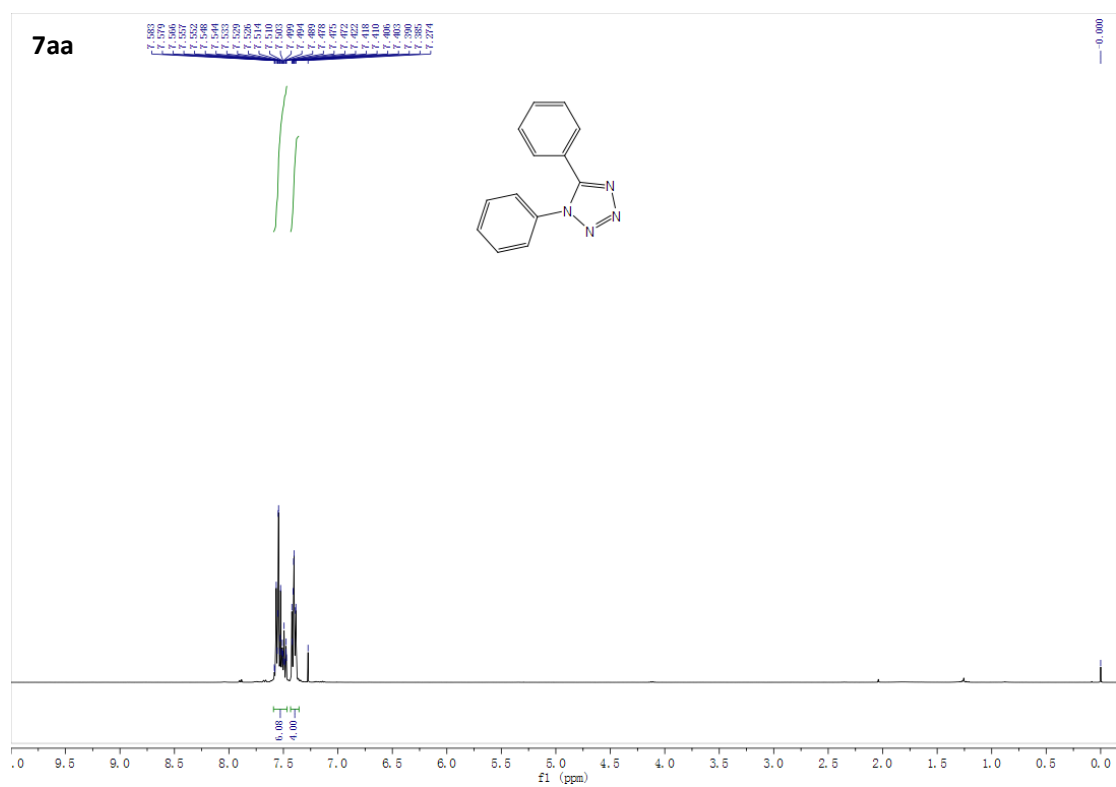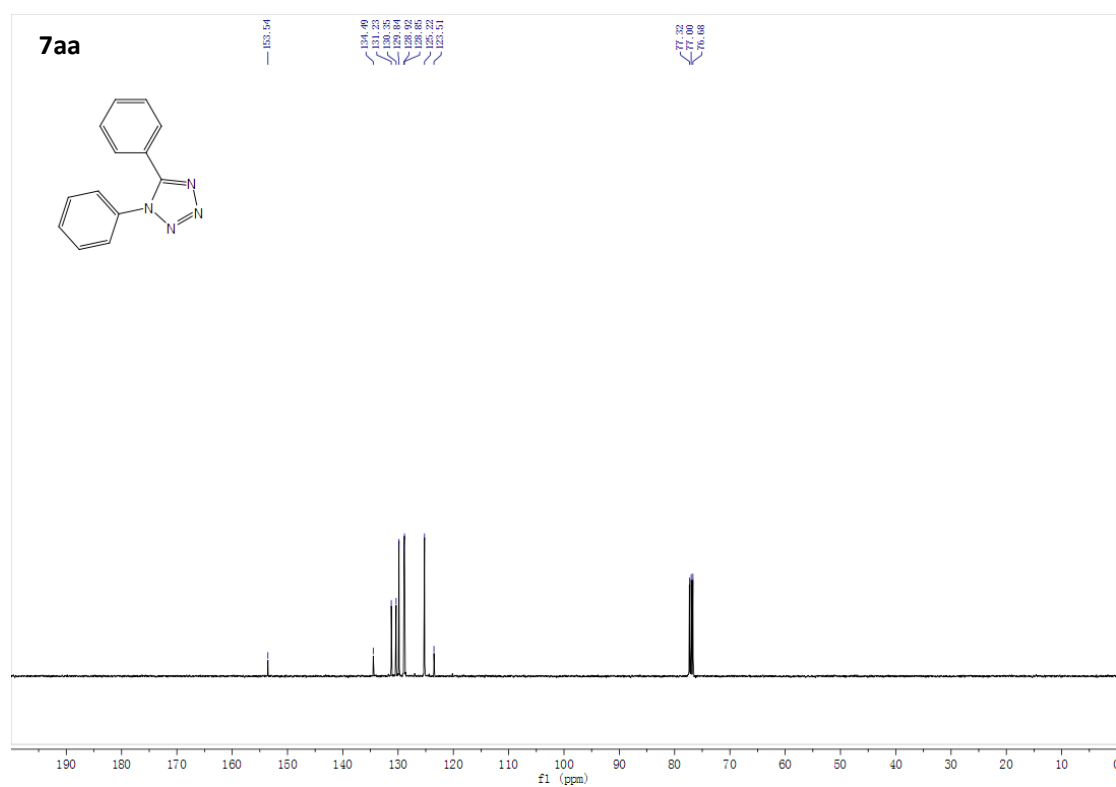

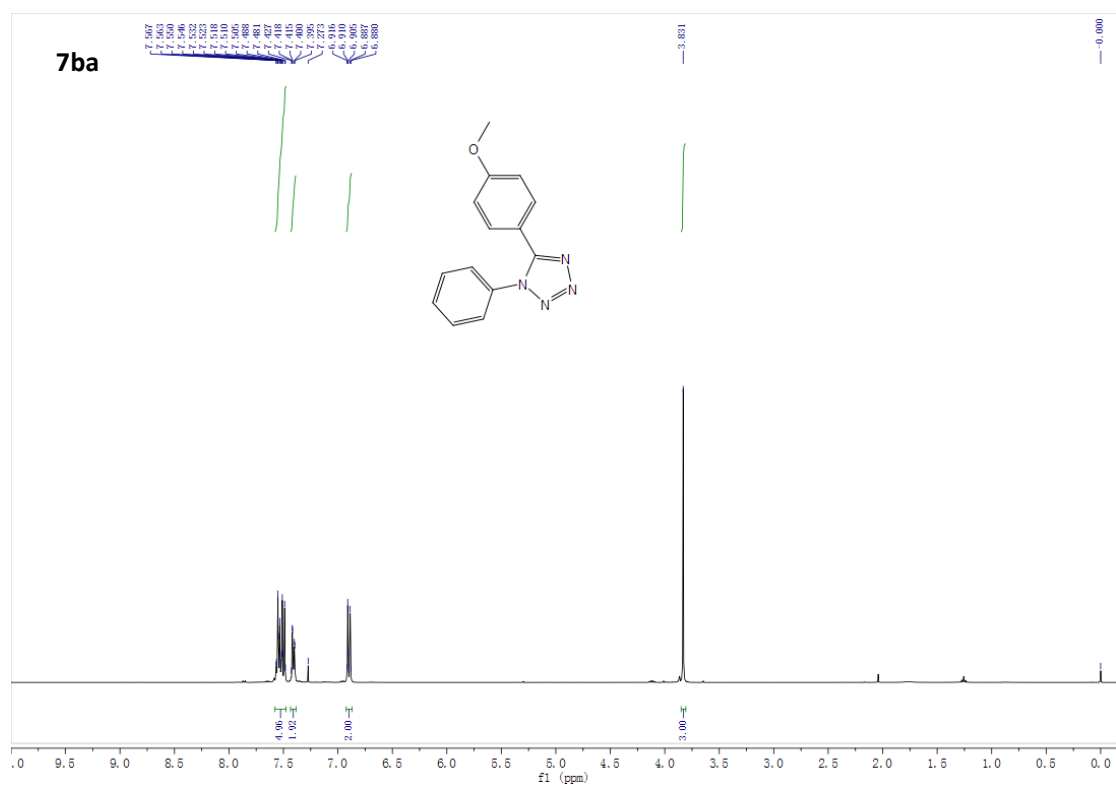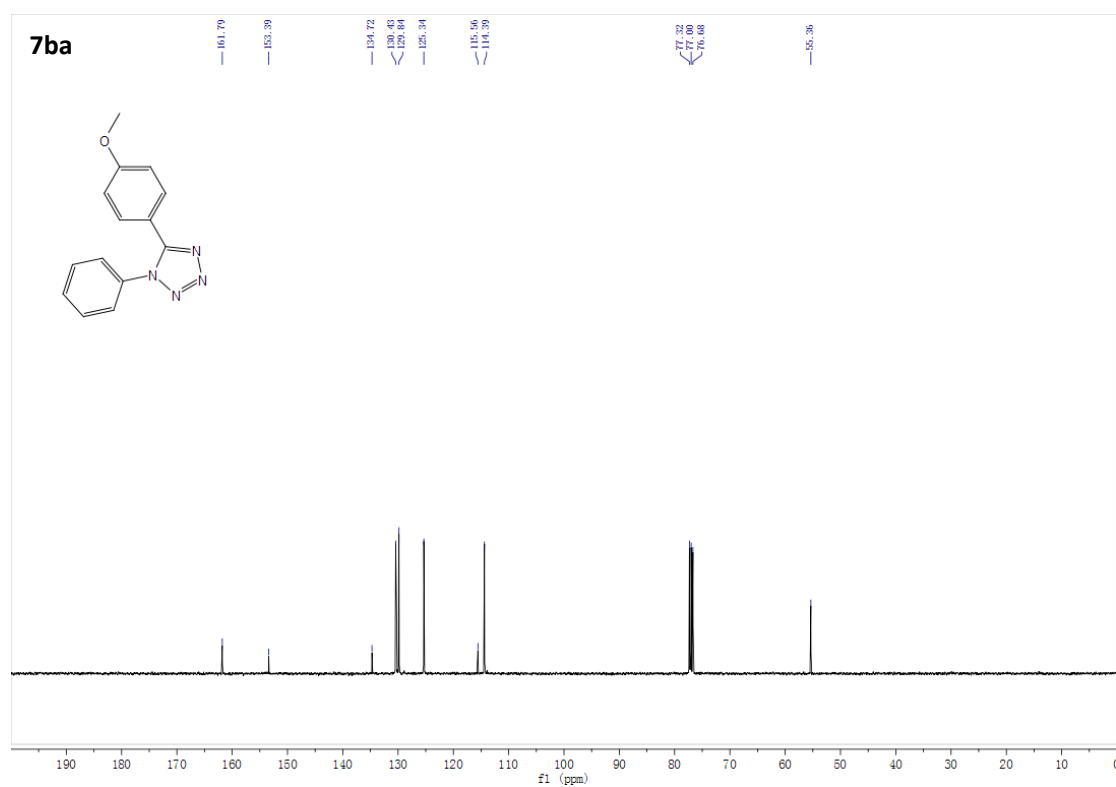

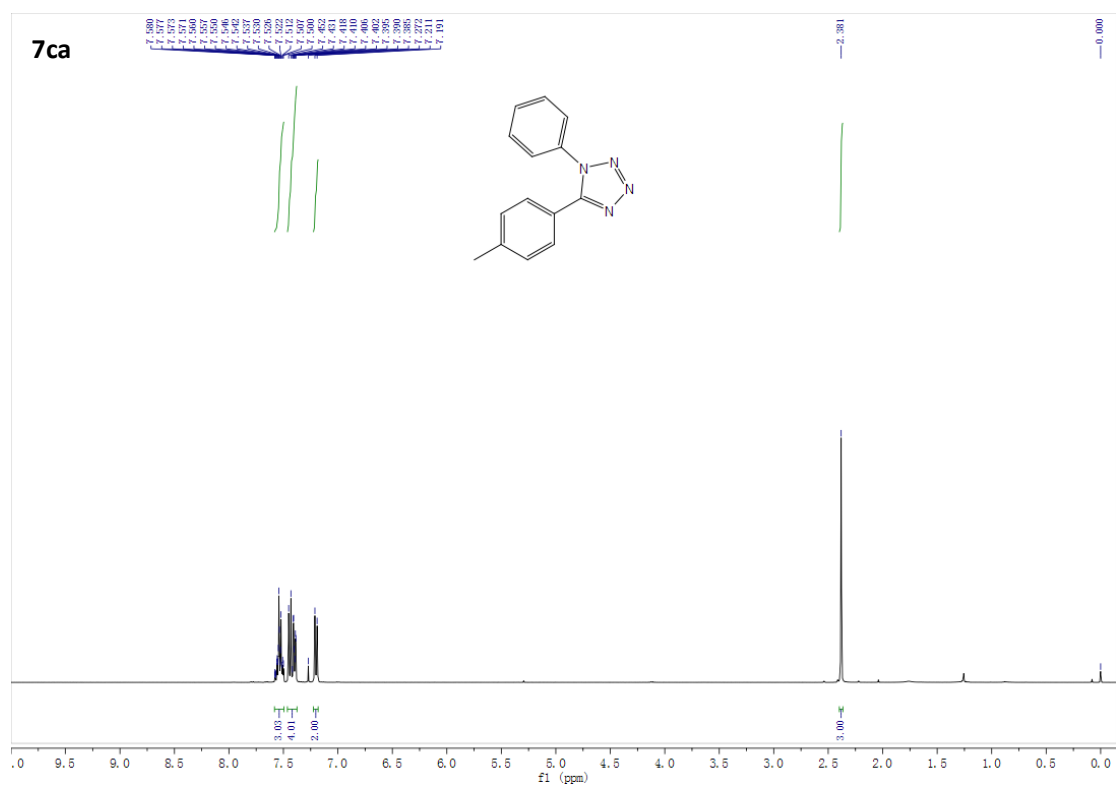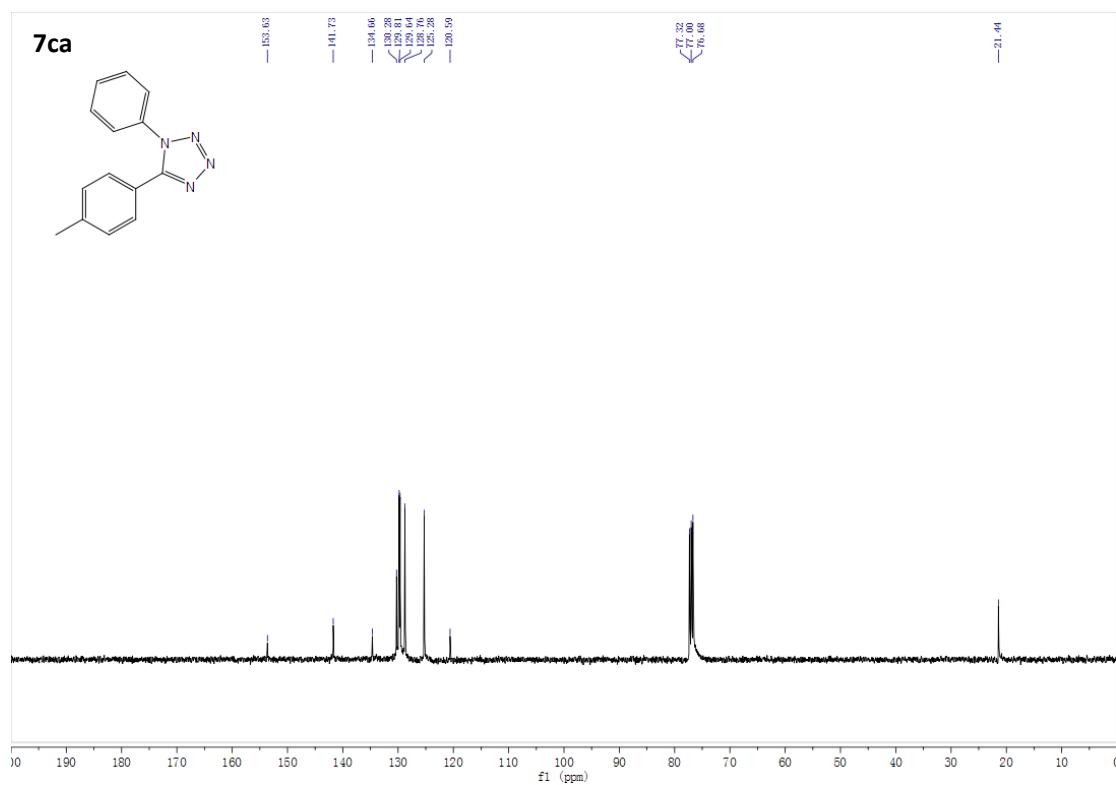

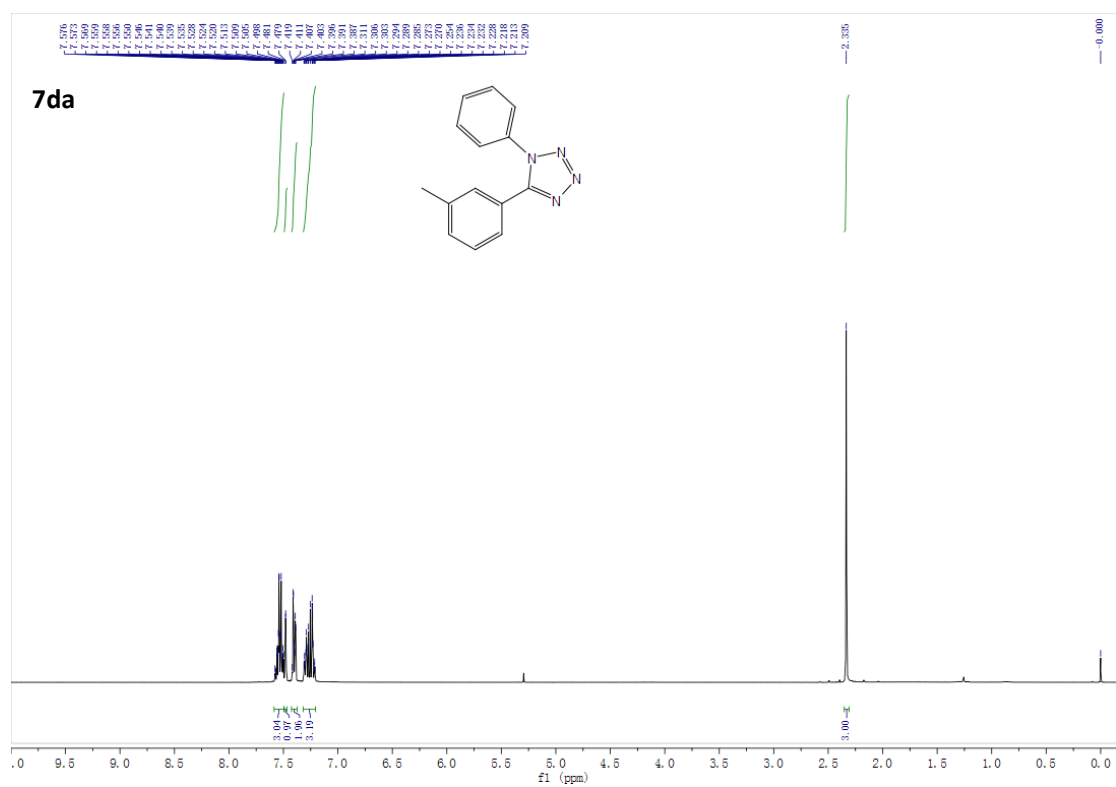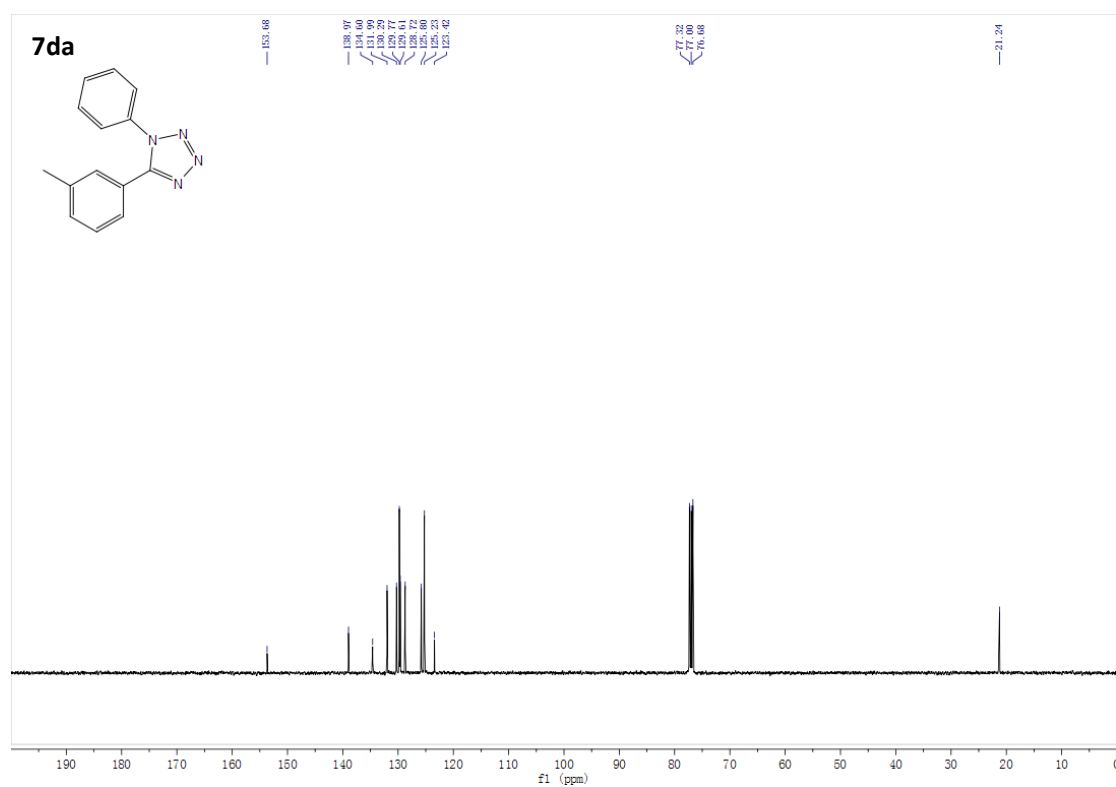

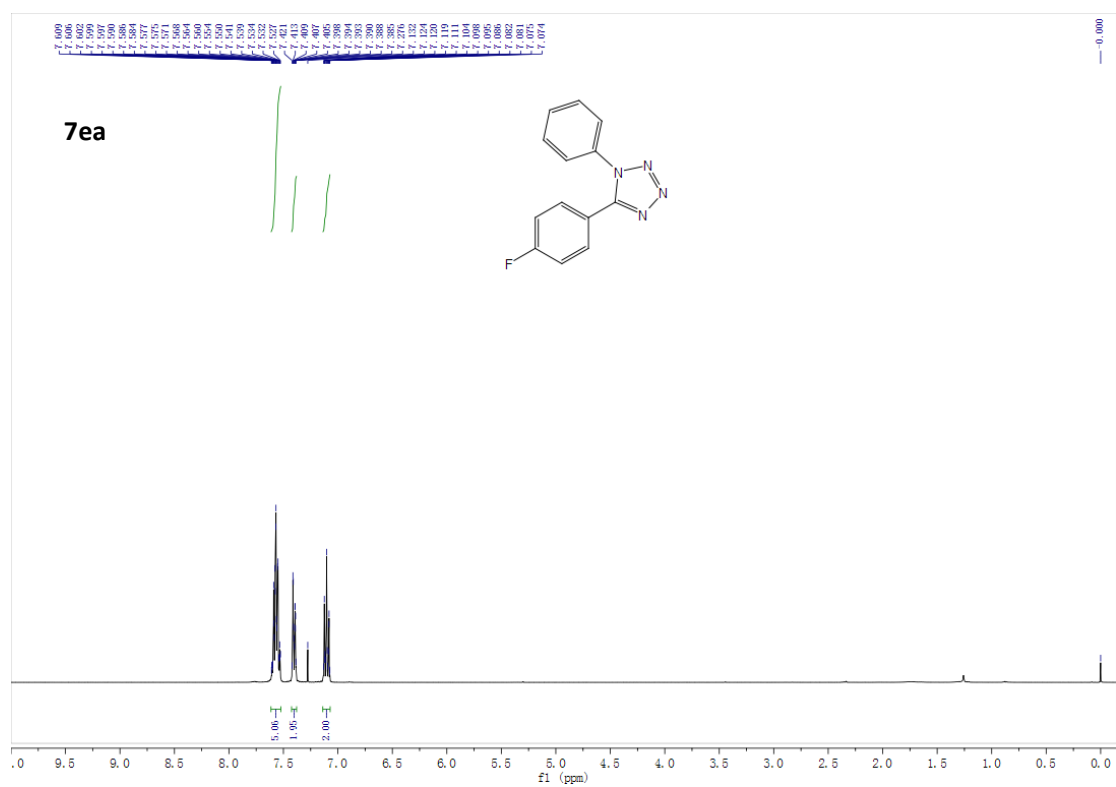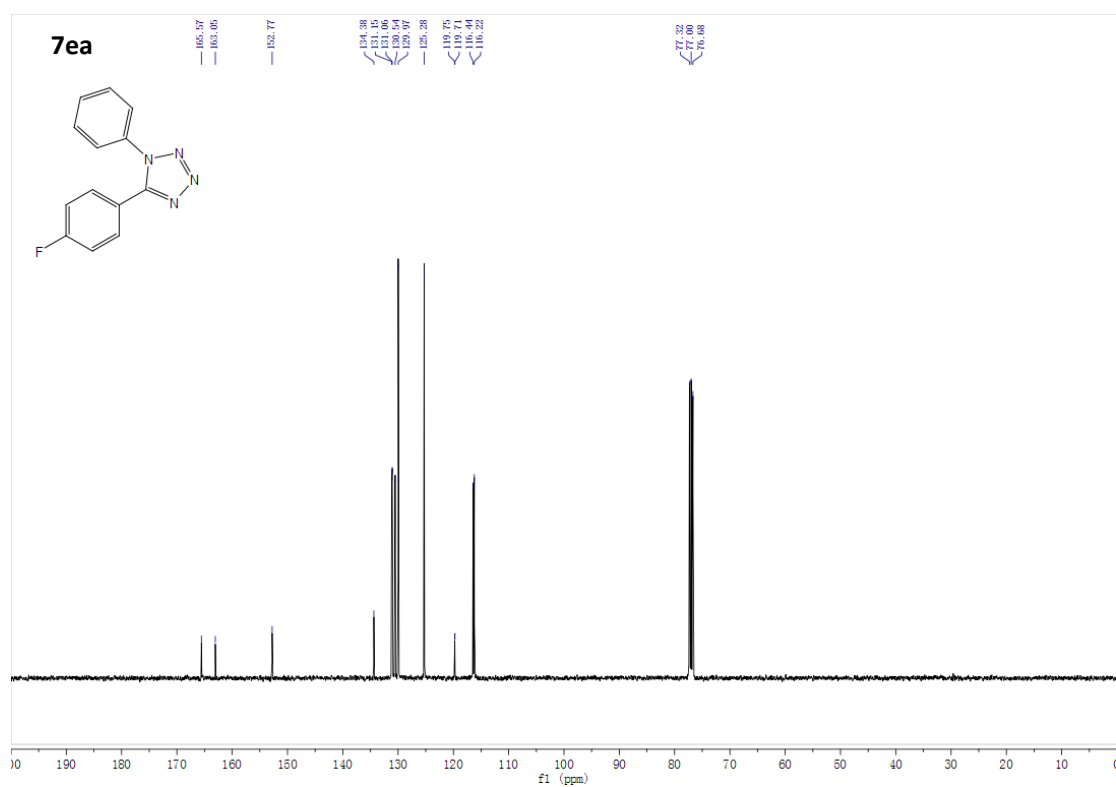

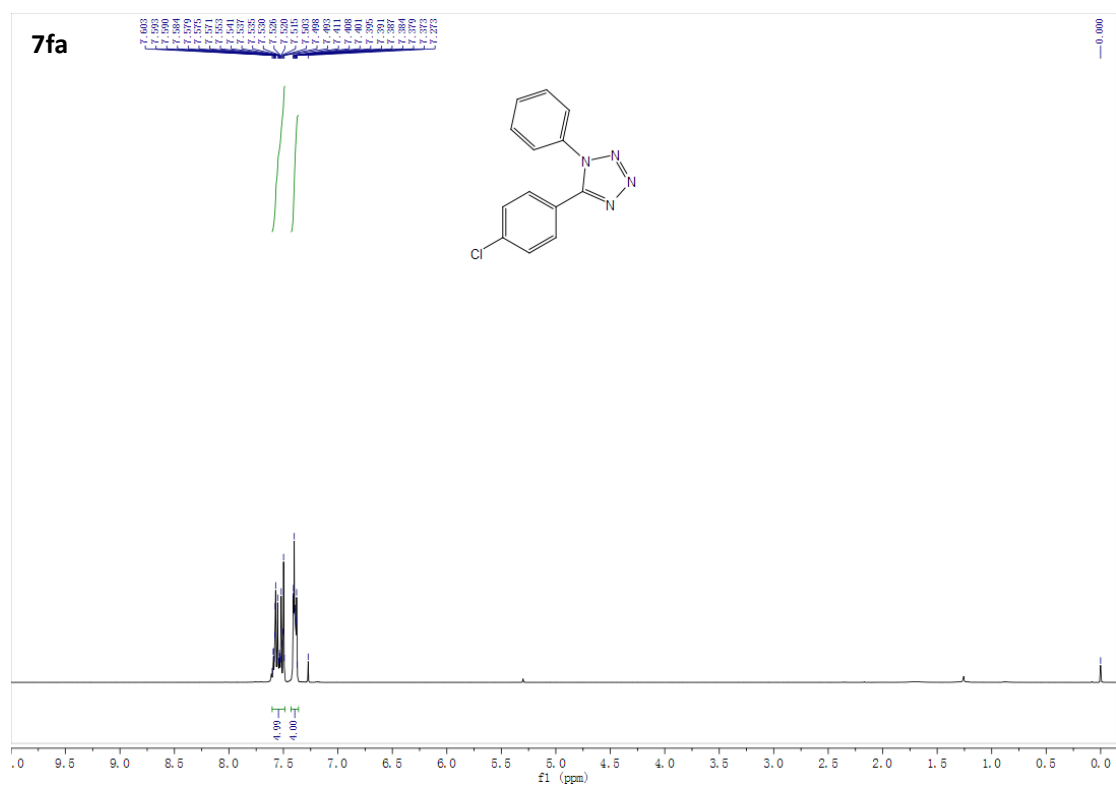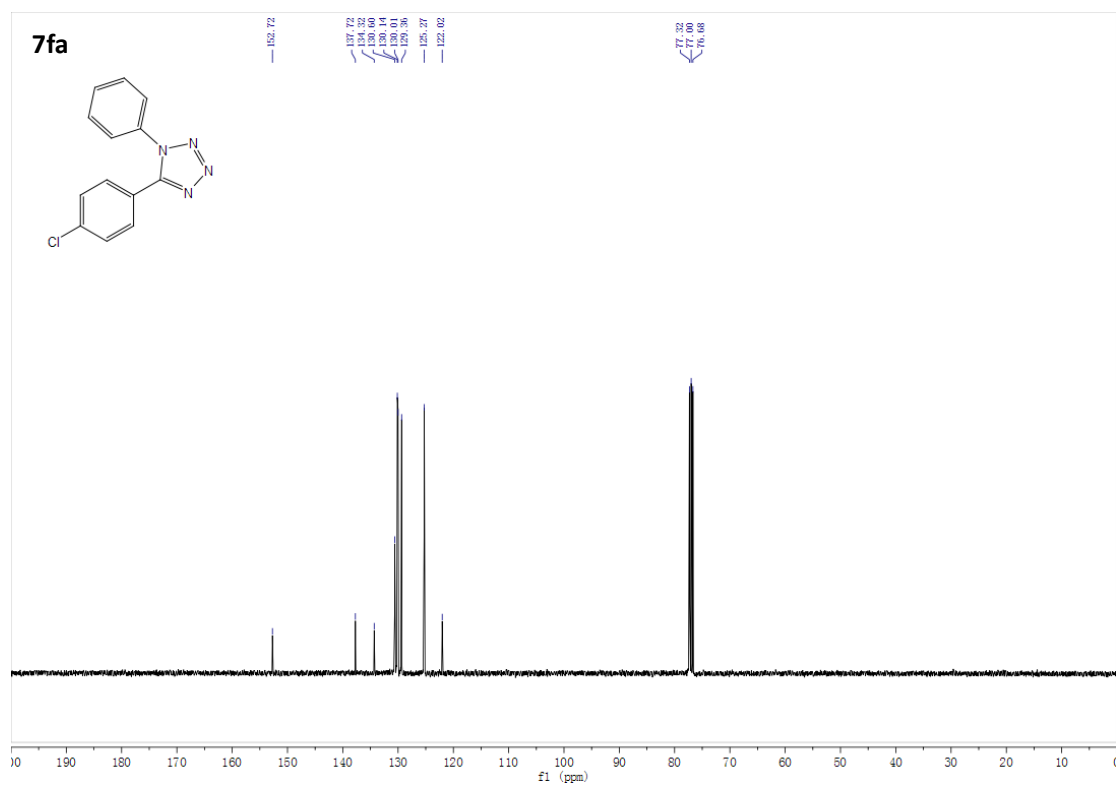

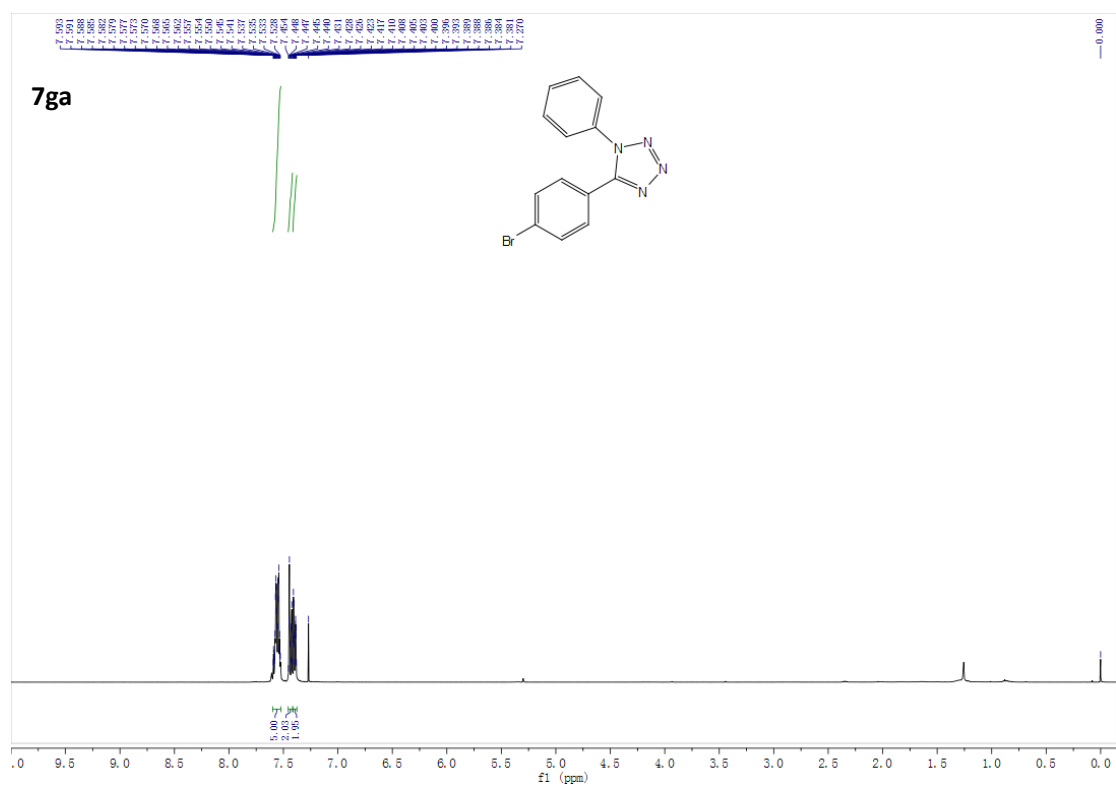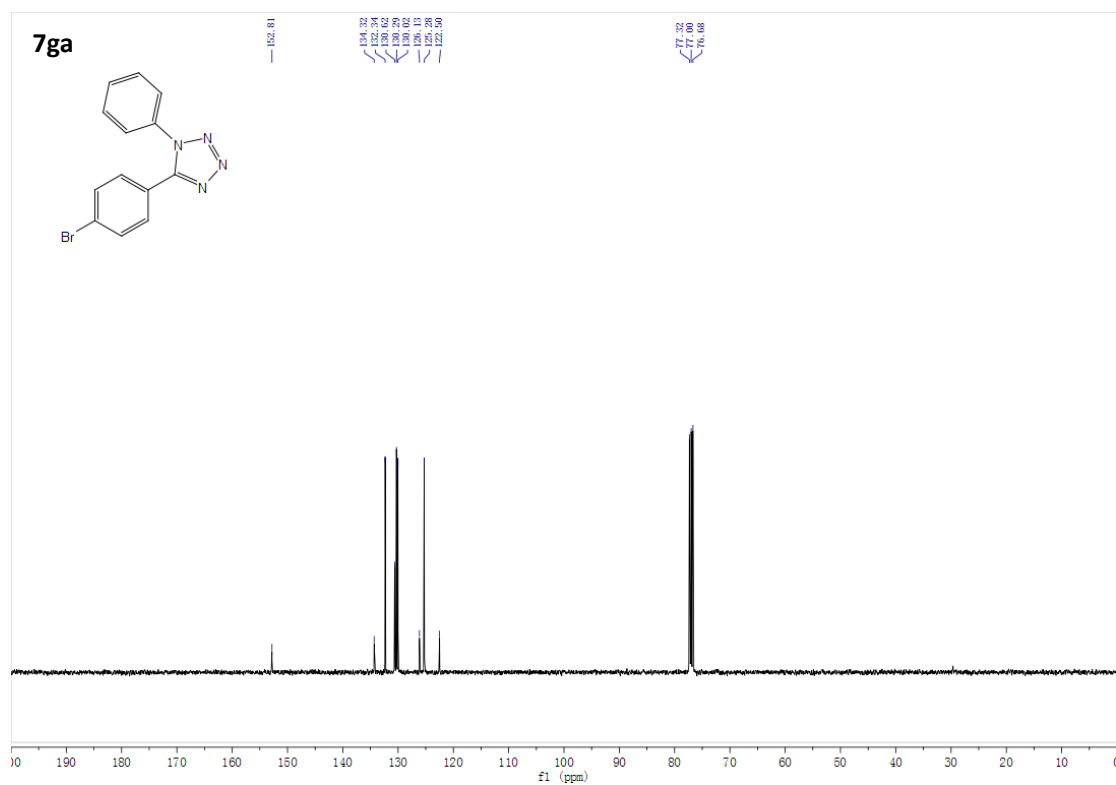



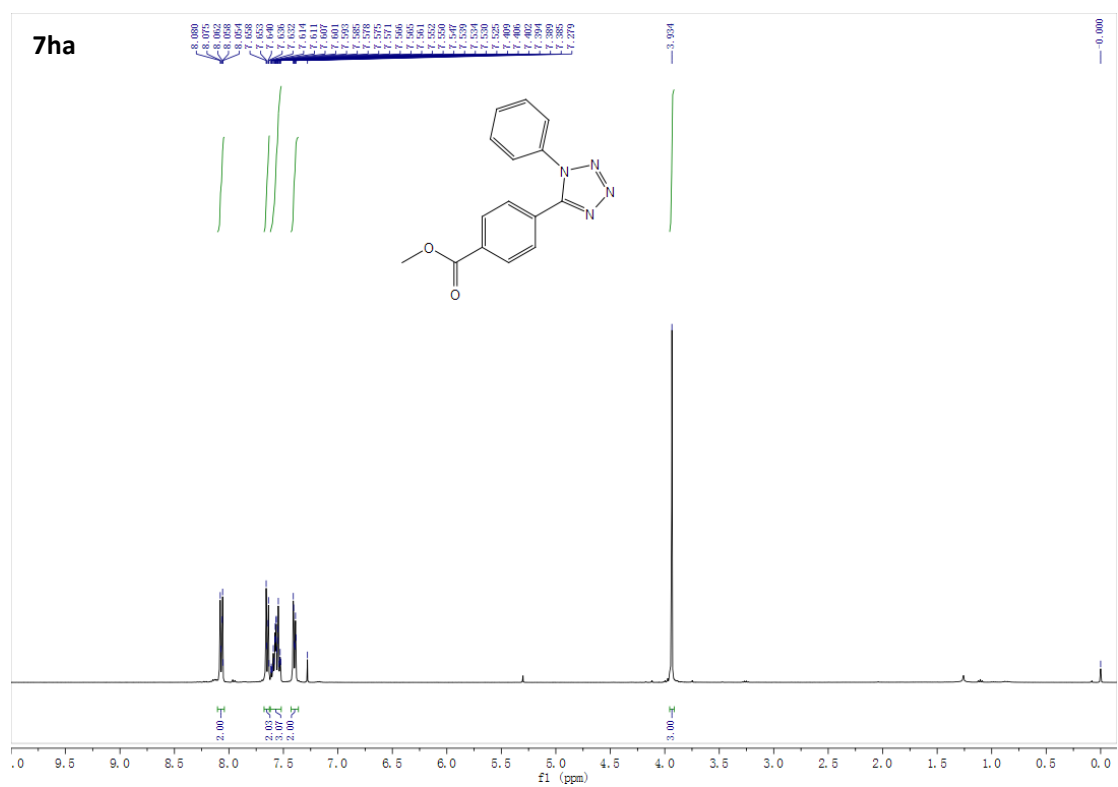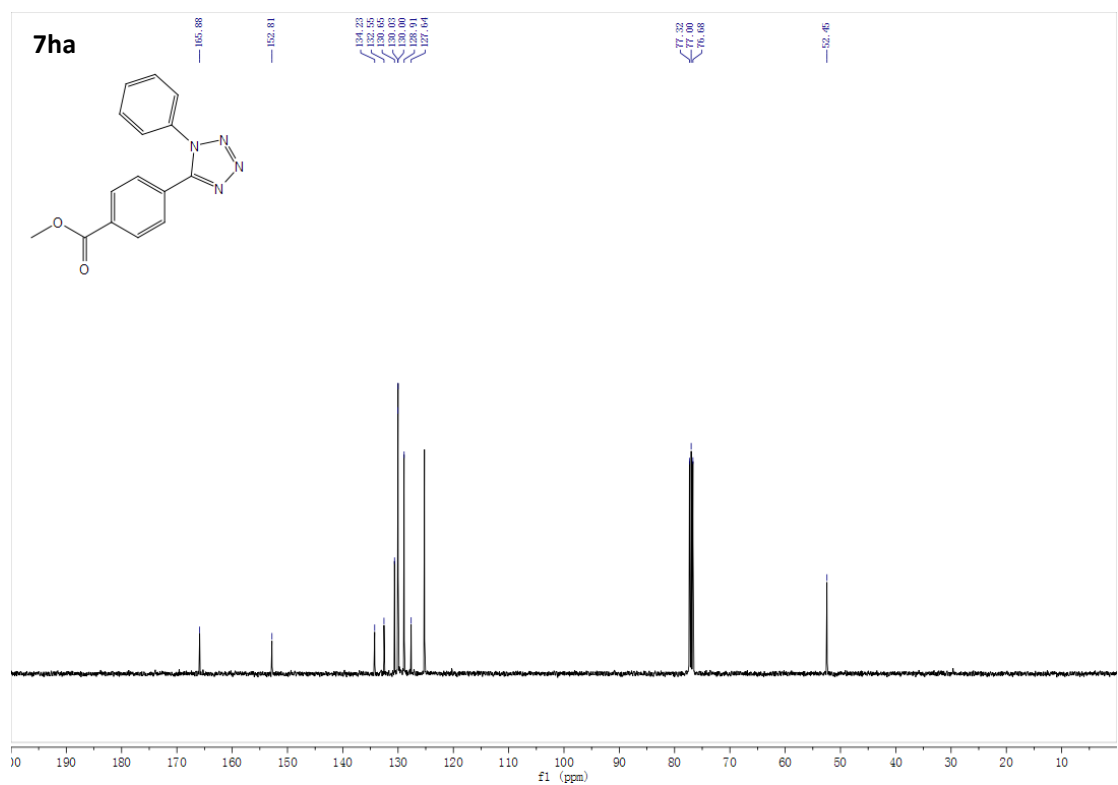

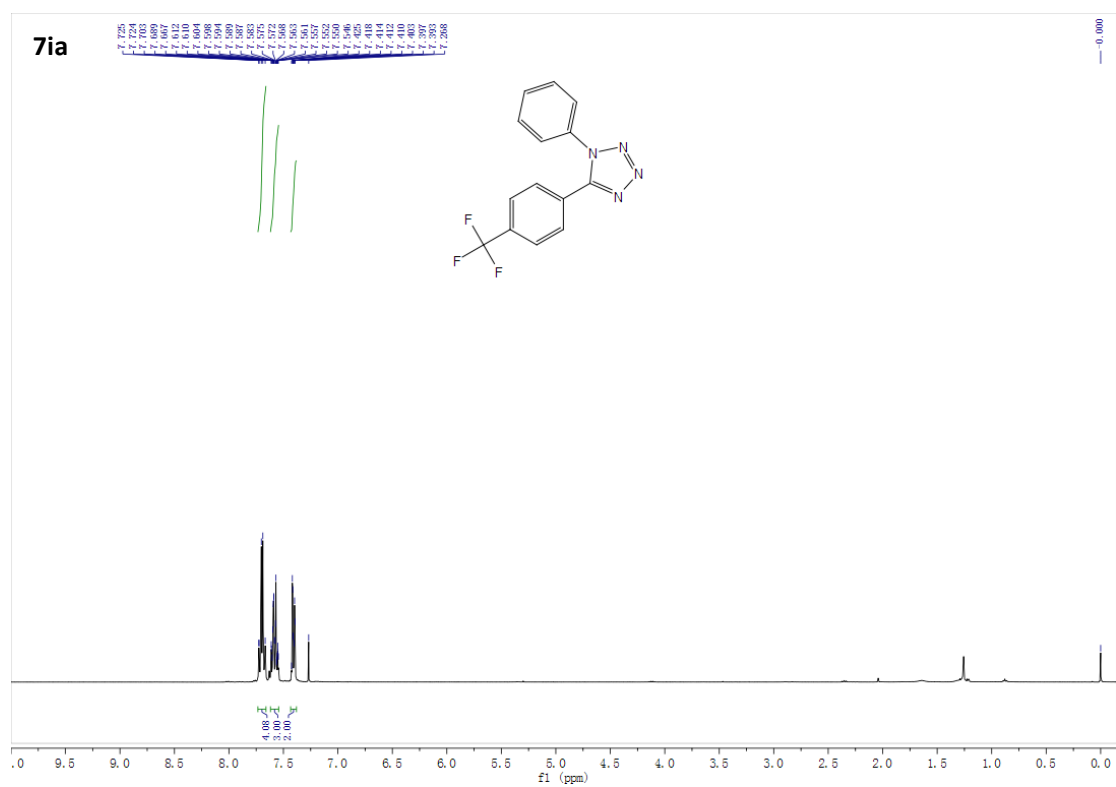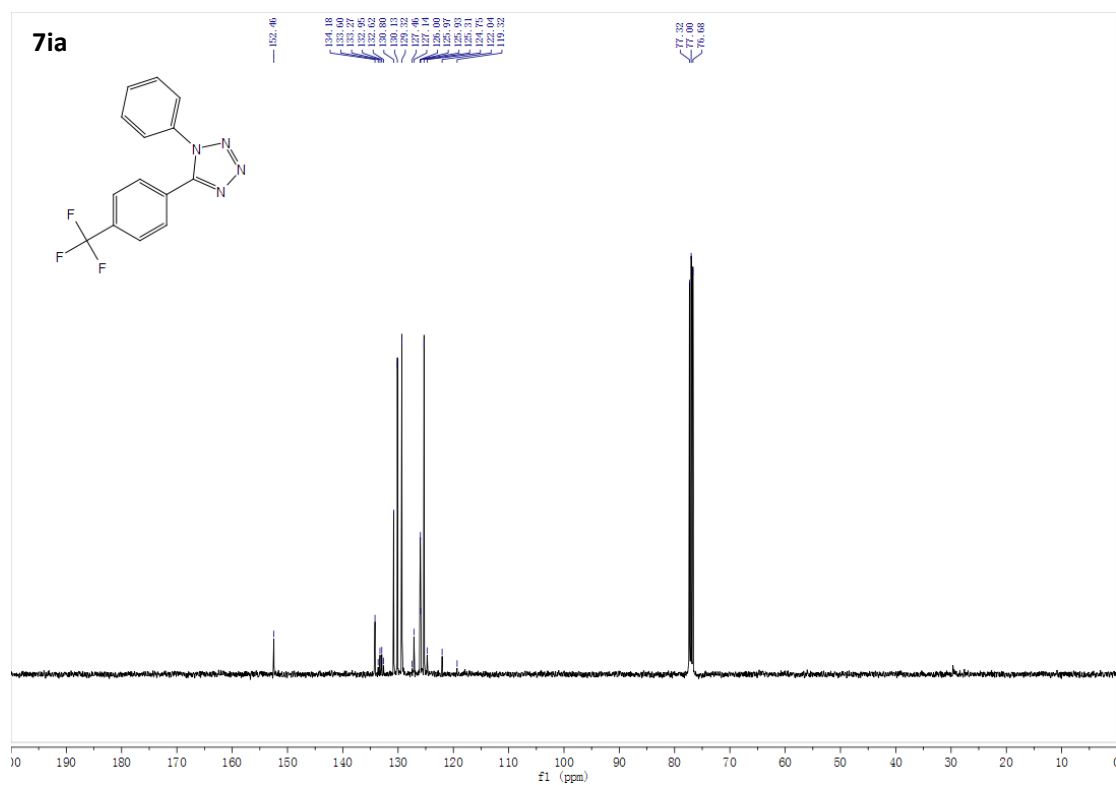

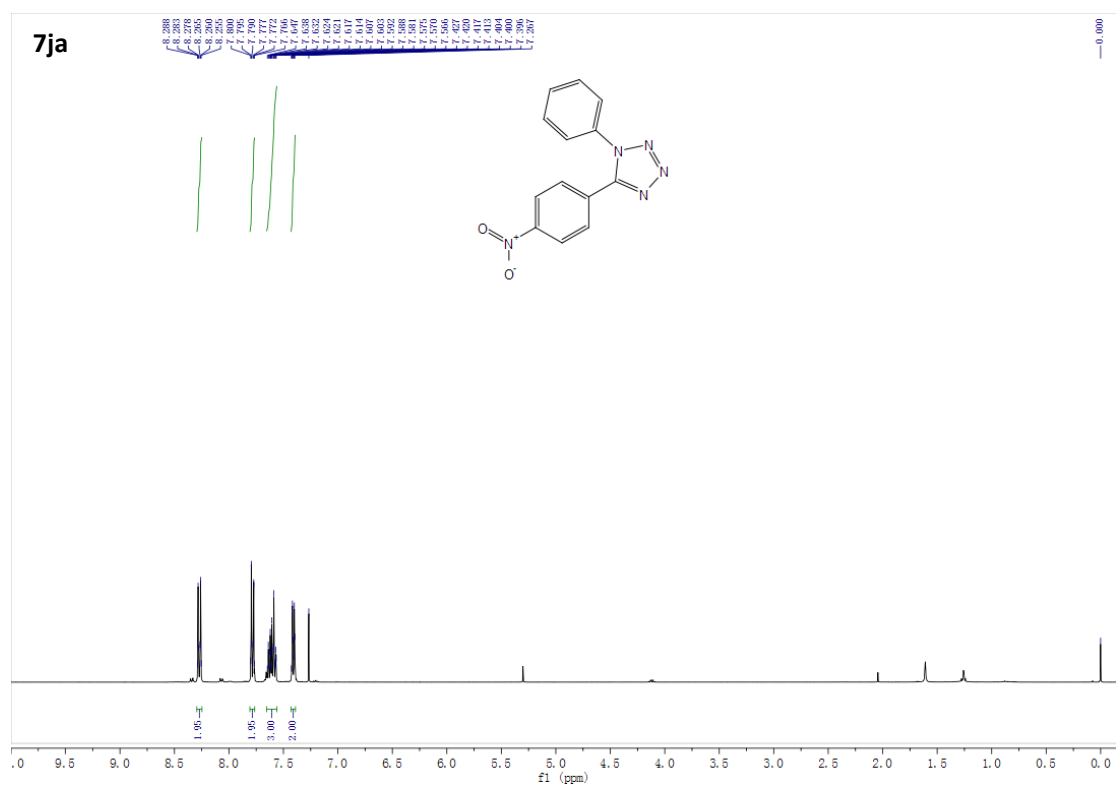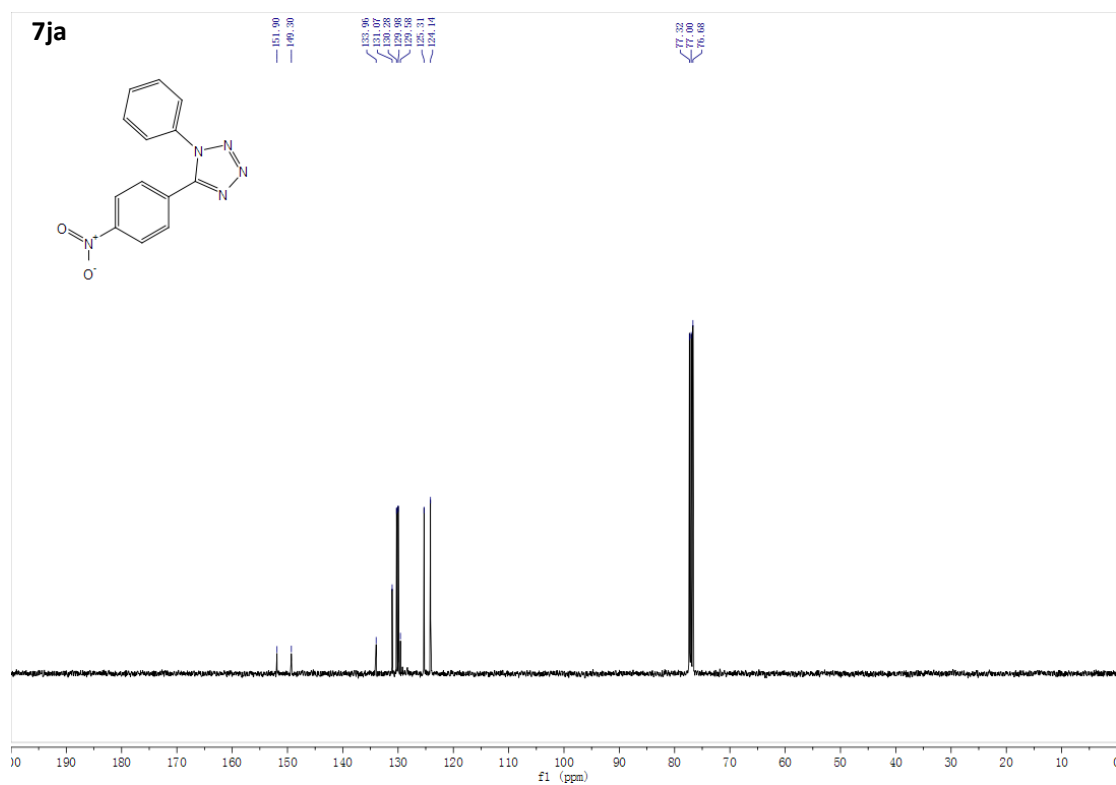

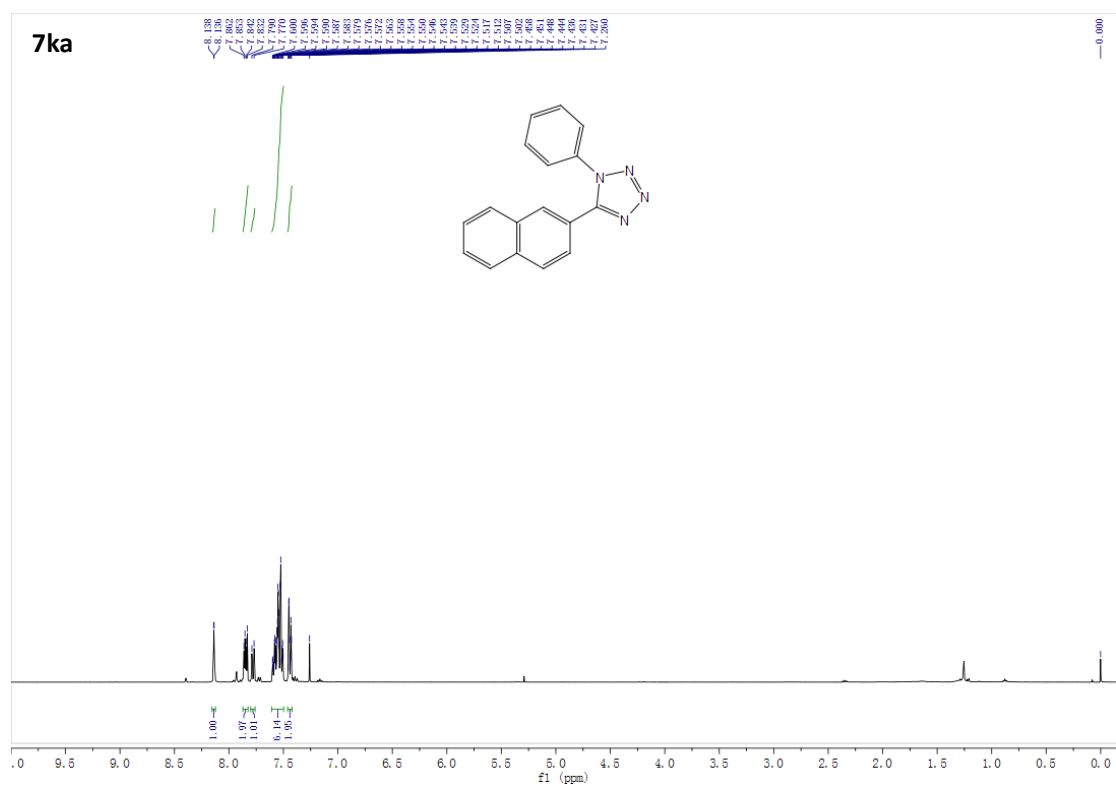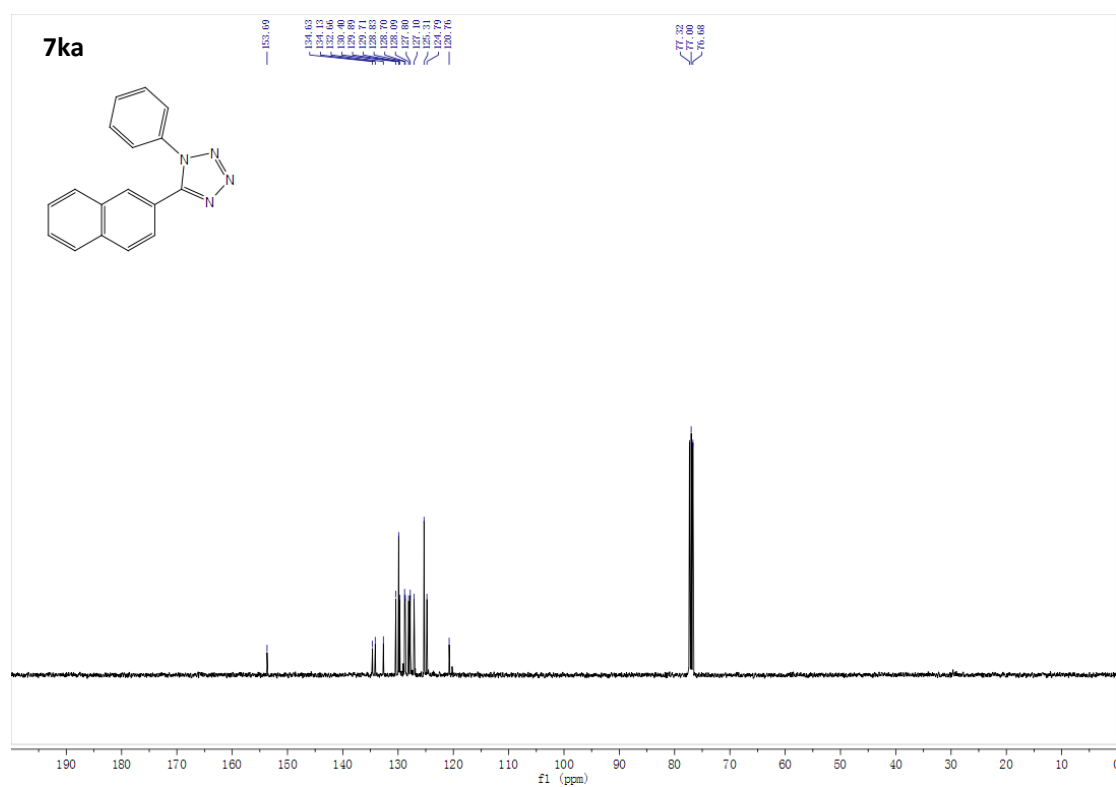

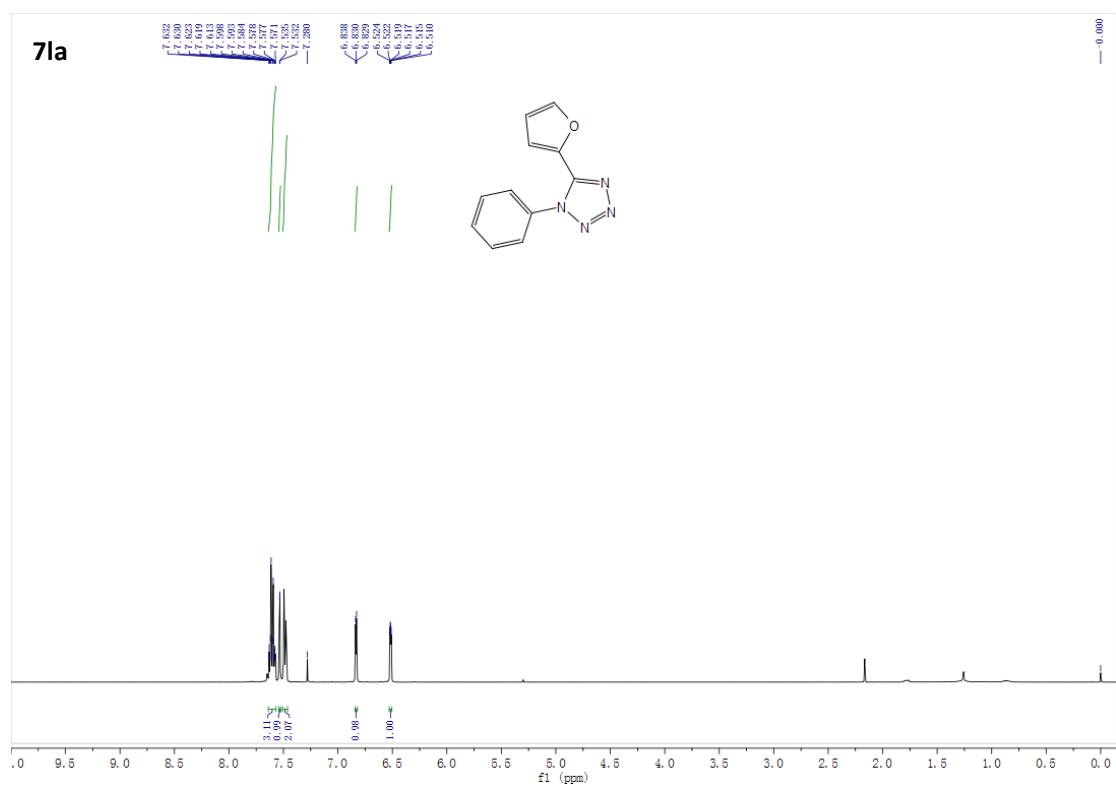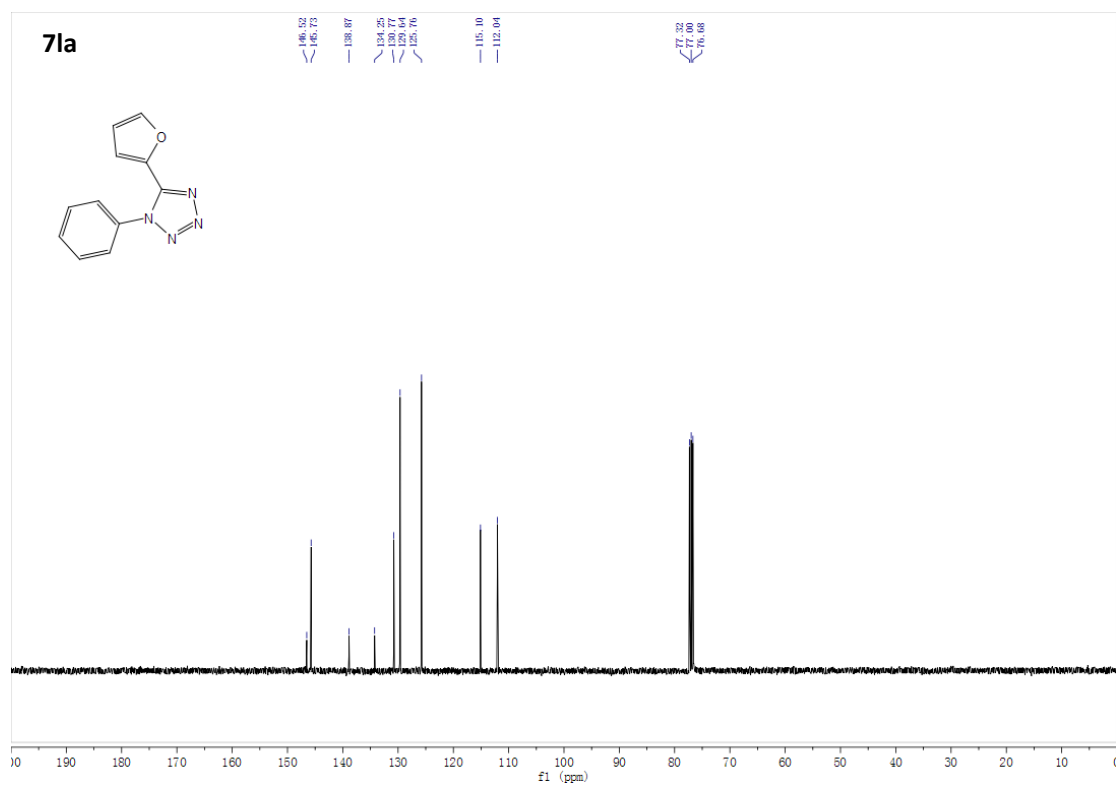

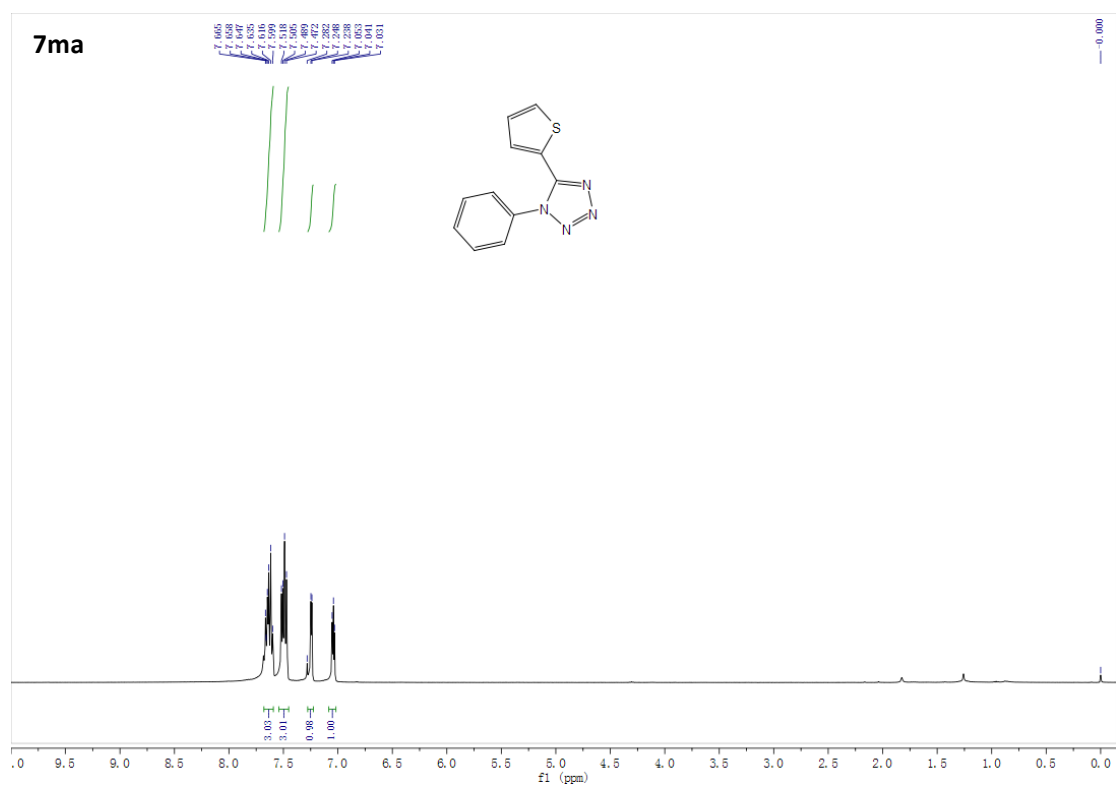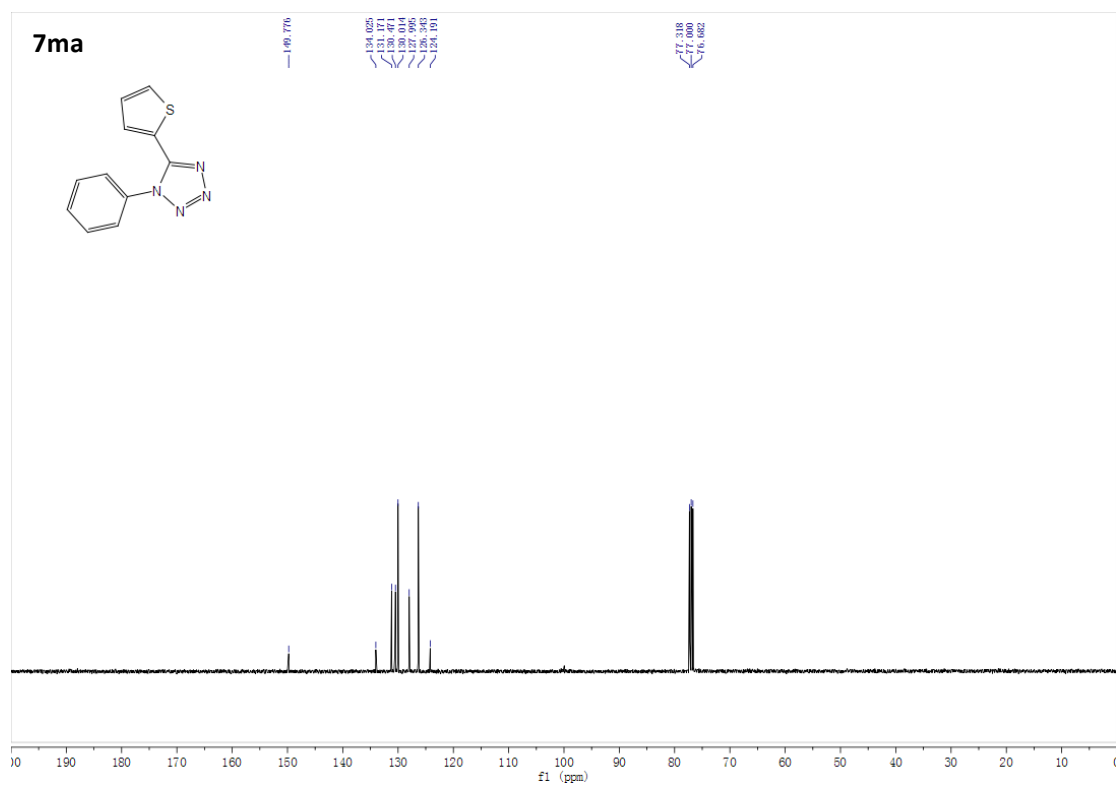

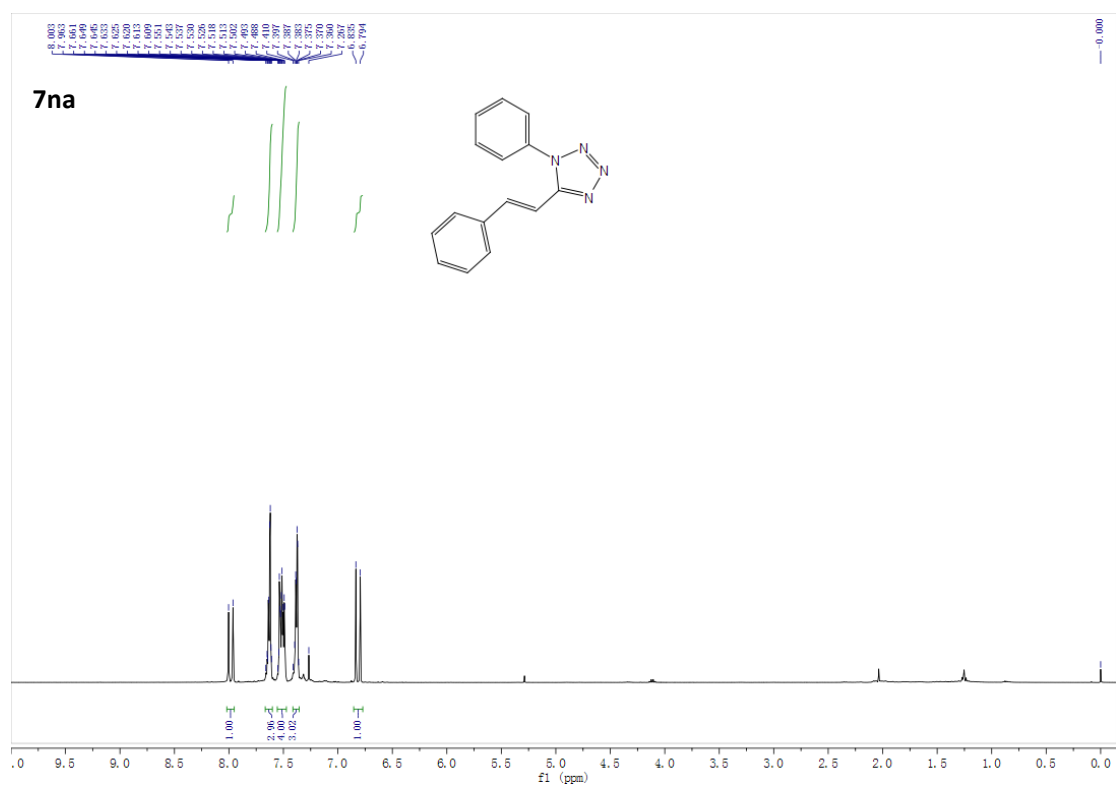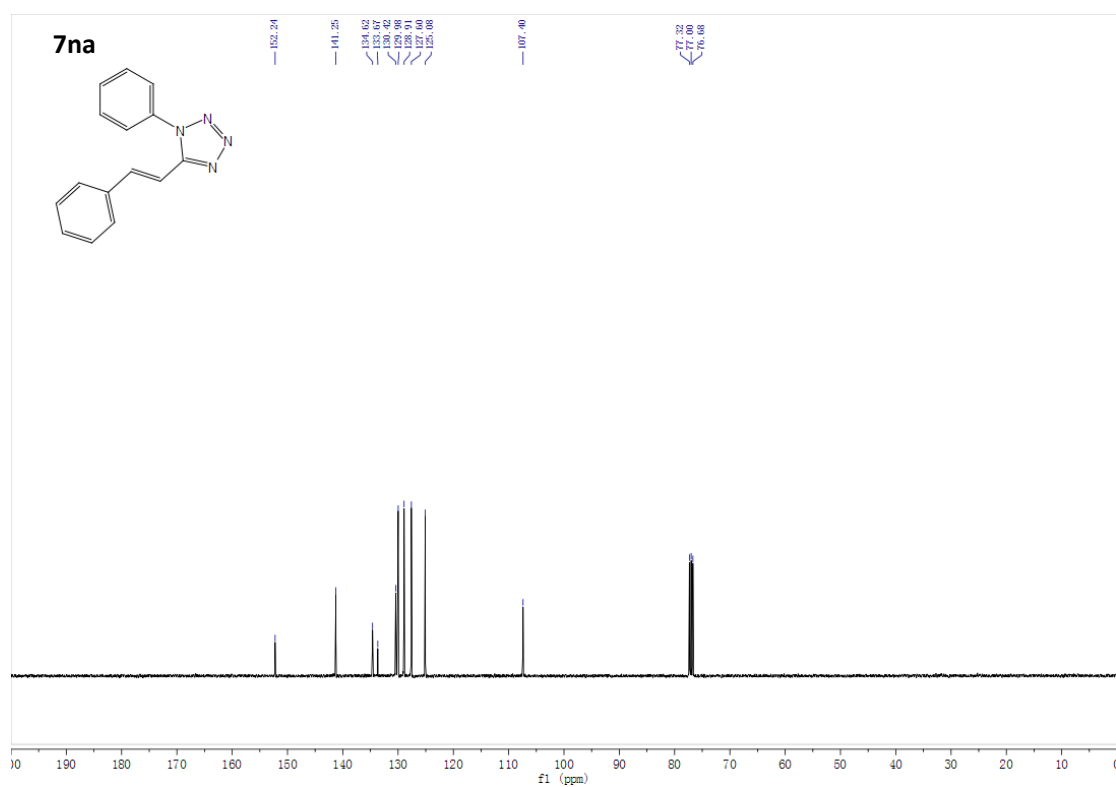

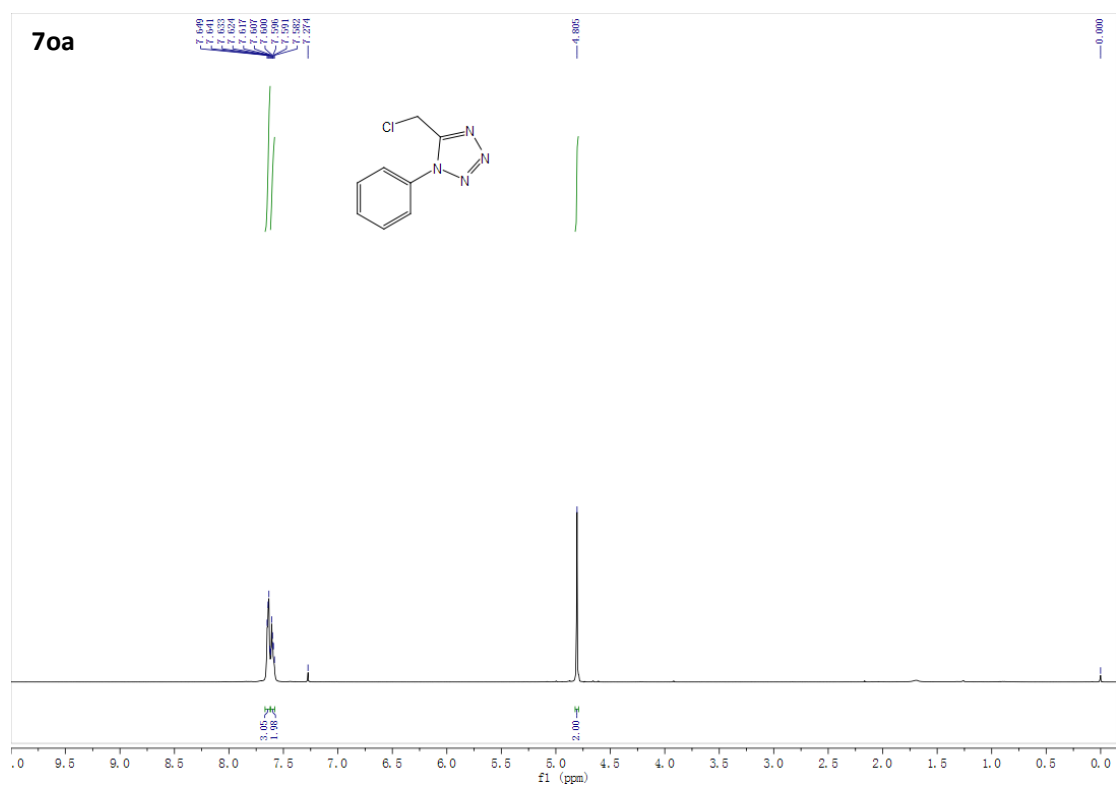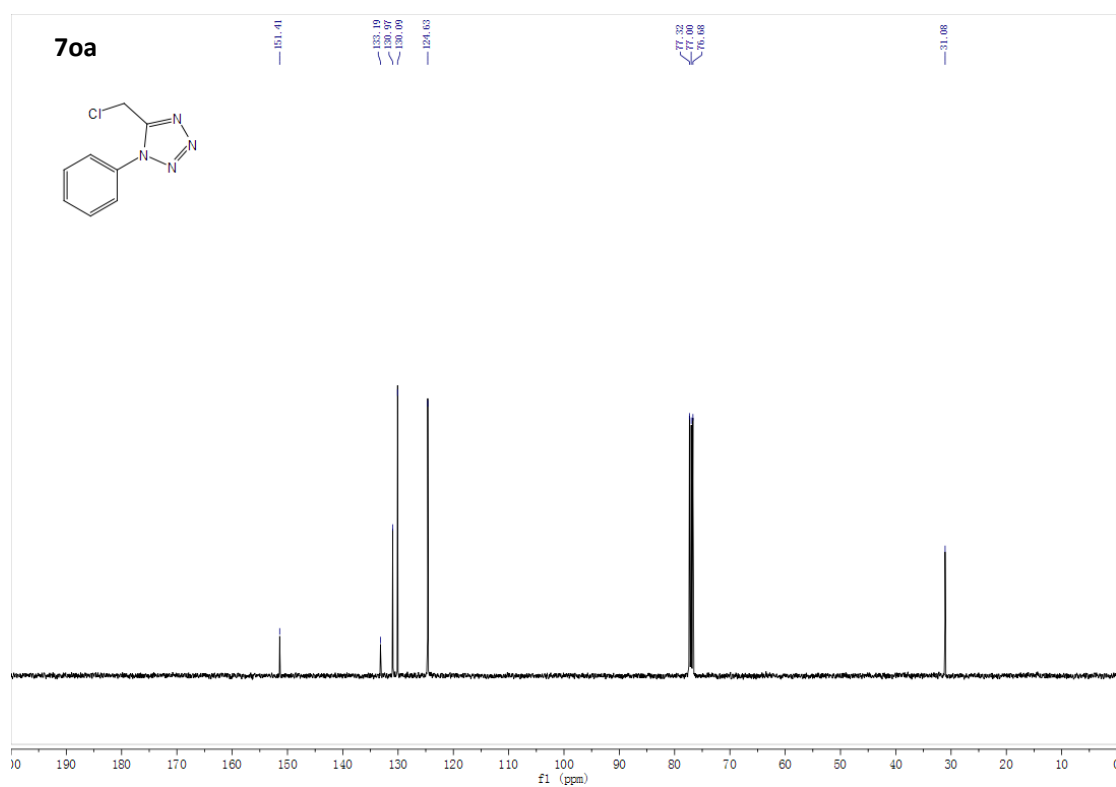



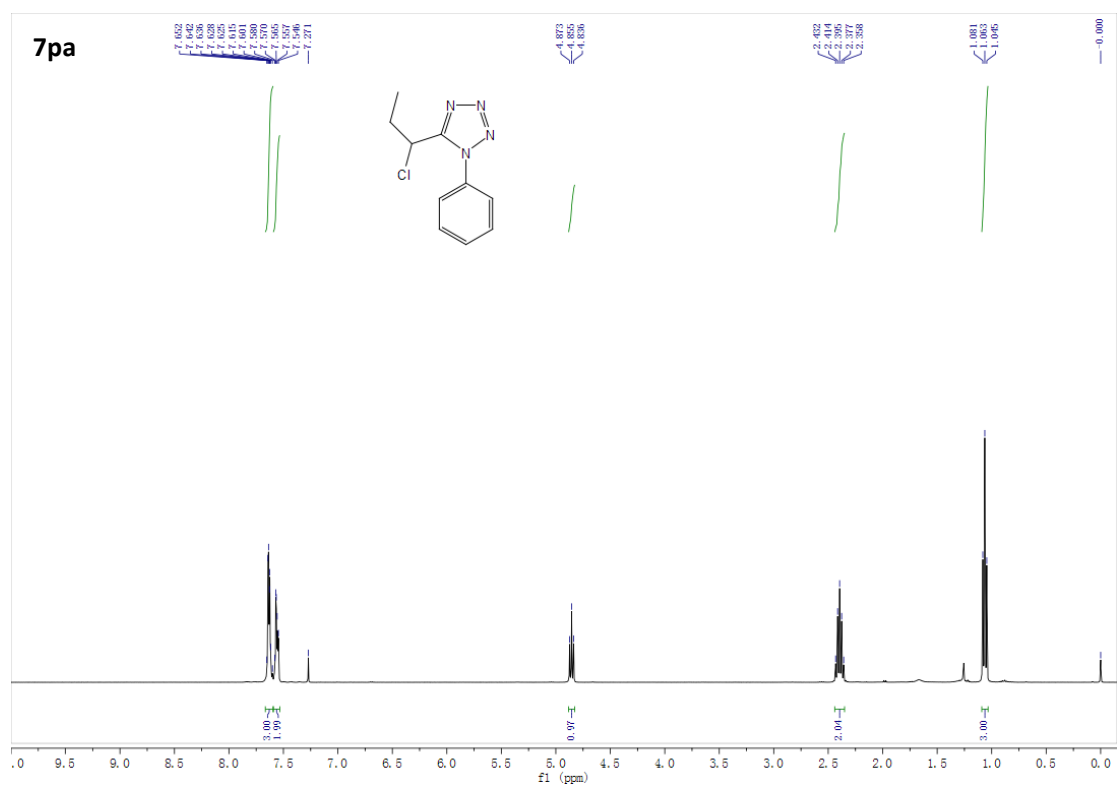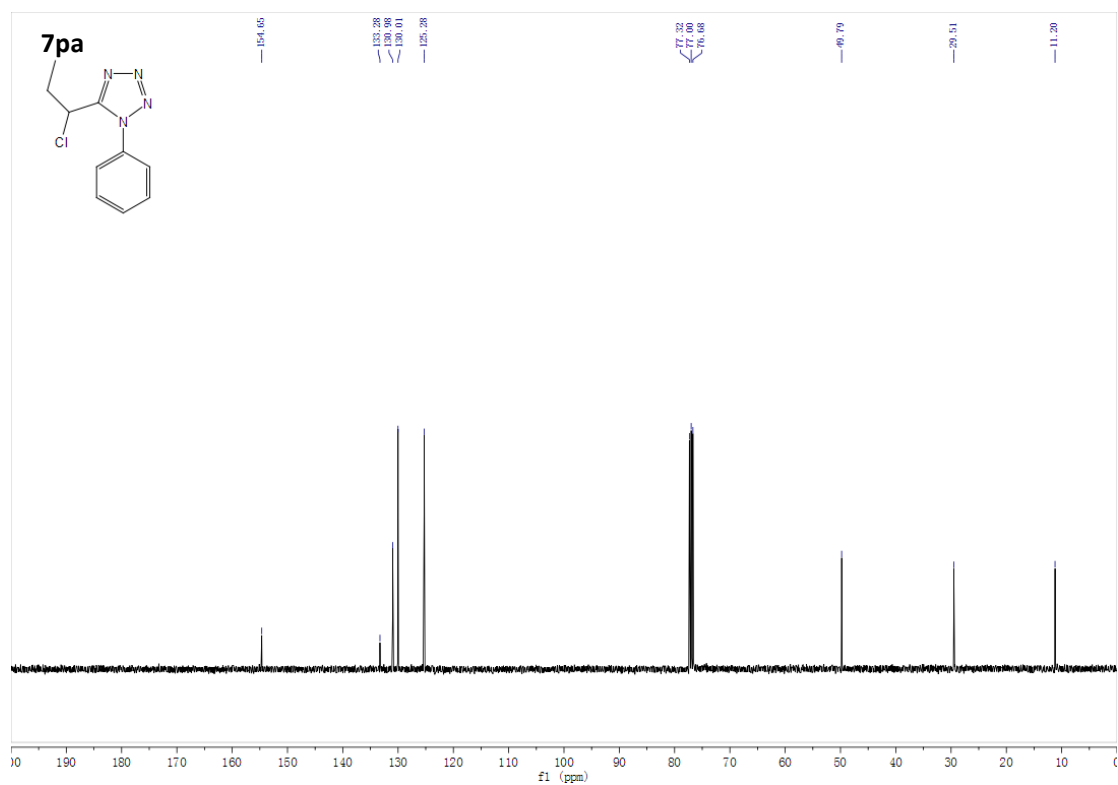

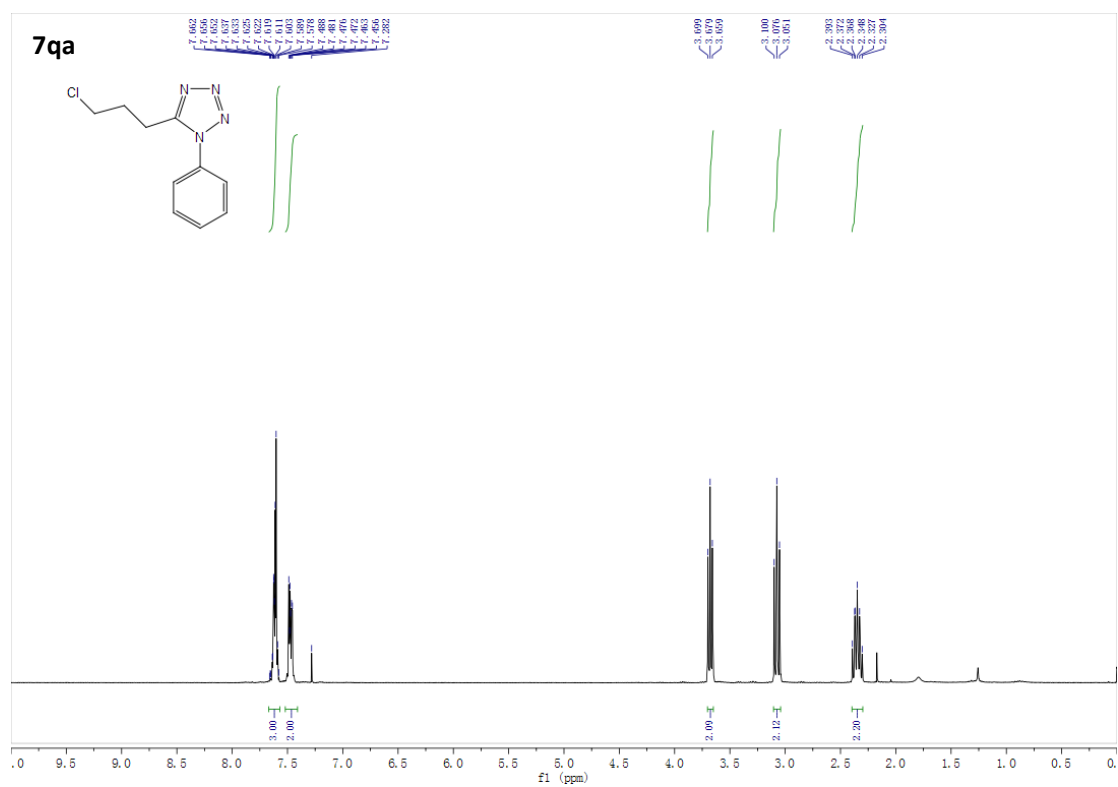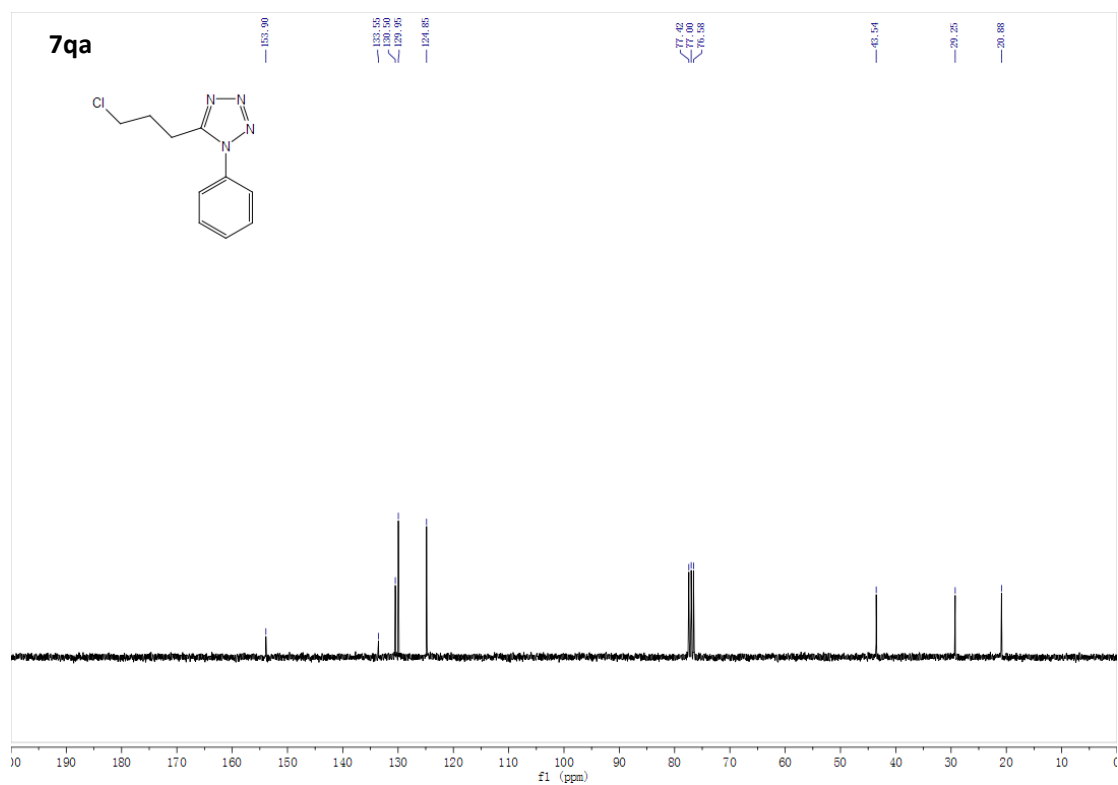

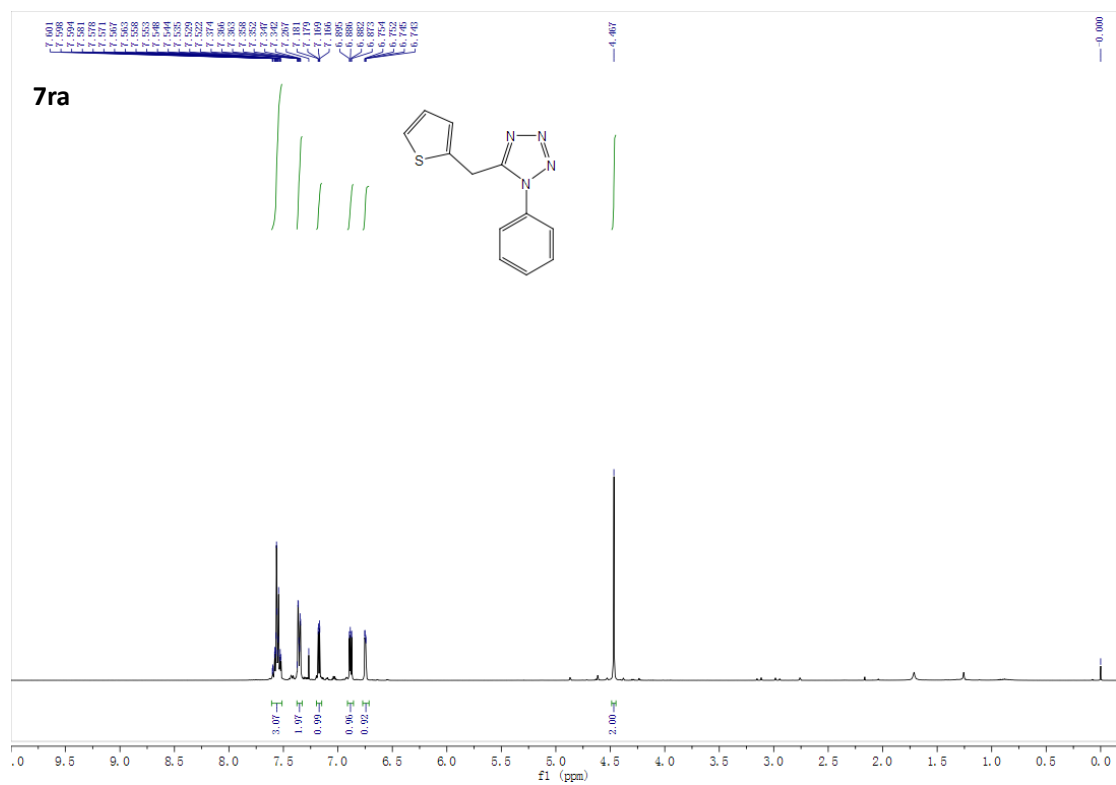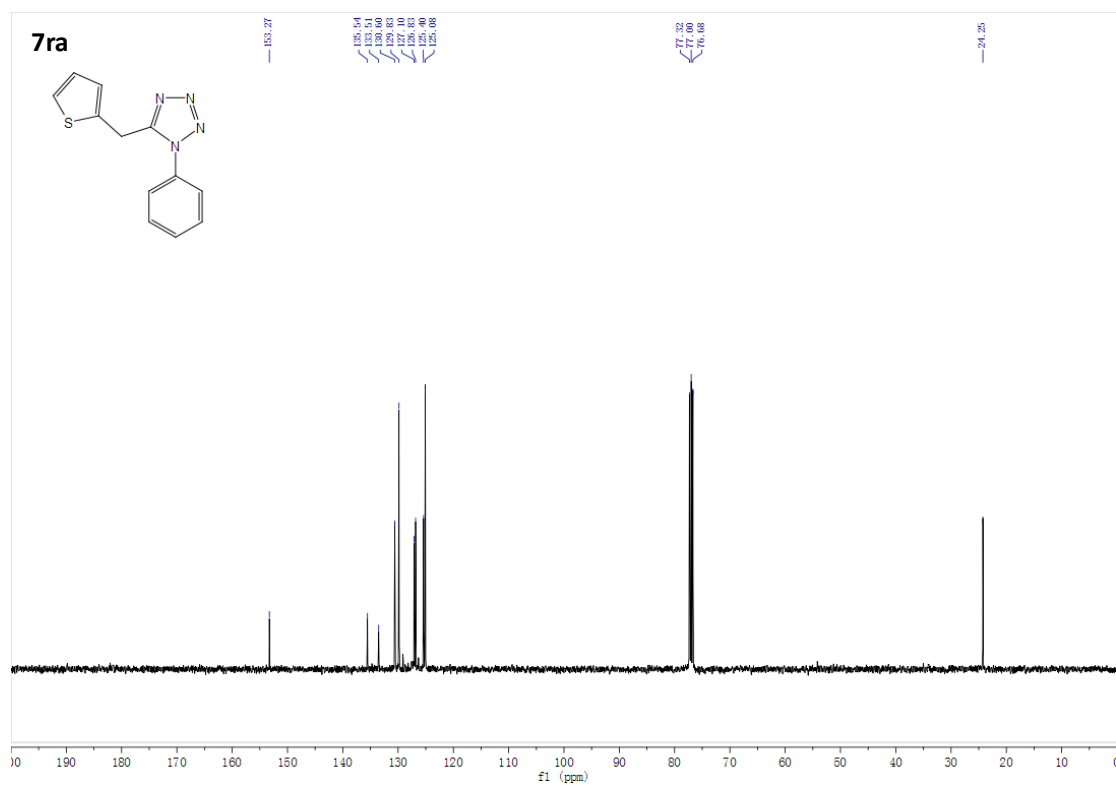

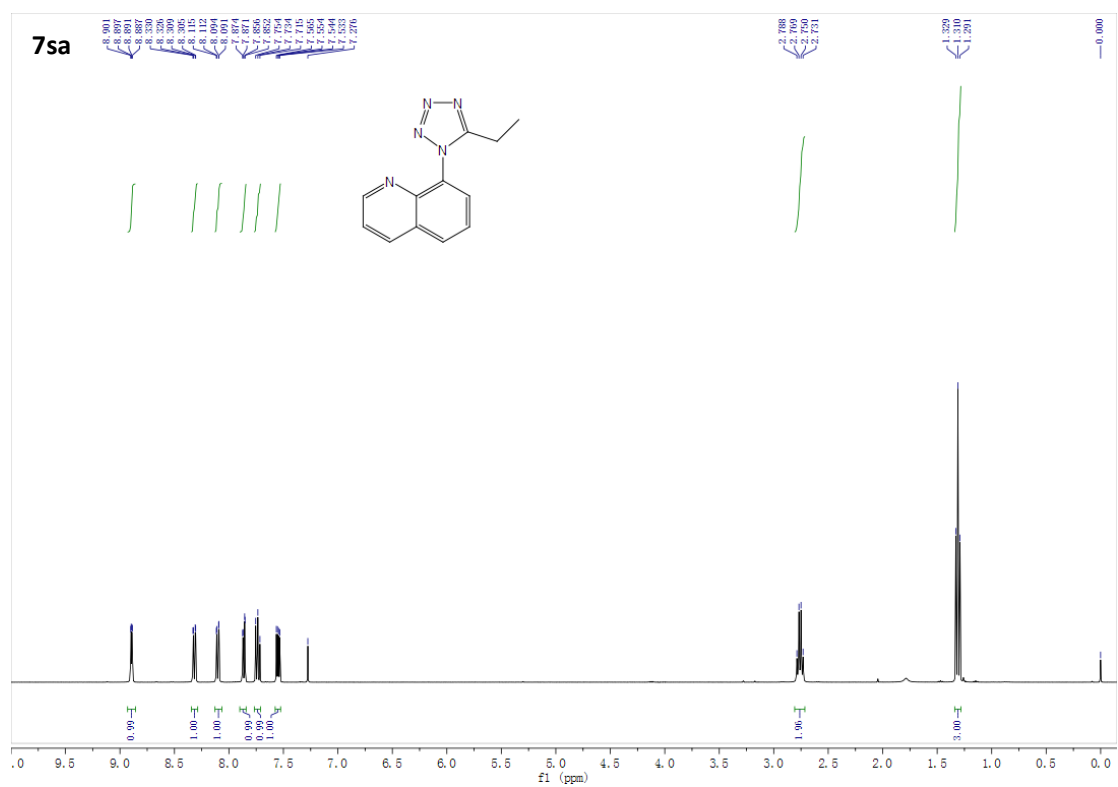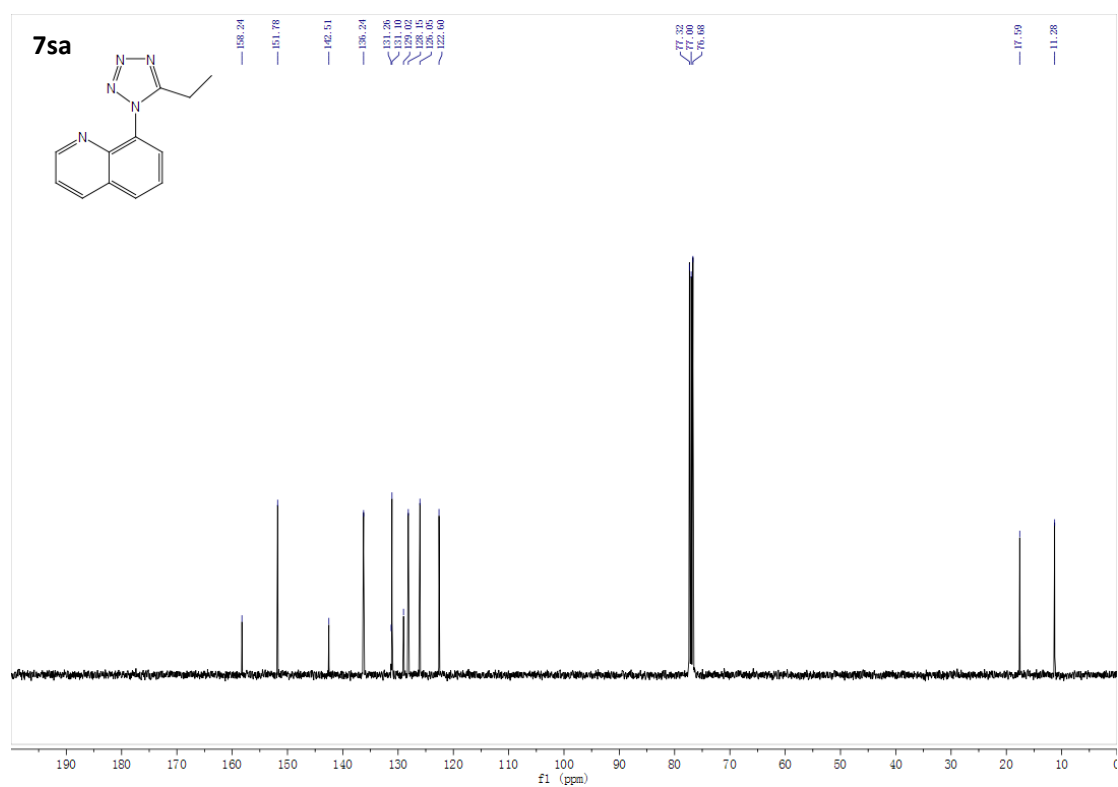

## References

- [1] J. Deruiter, B. E. Swearingen, V. Wandrekar and C. A. Mayfield, *J. Med. Chem.*, **1989**, 32, 1033.
- [2] Jesus M. Aizpurua and Claudio Palomo, *Tetrahedron Letters.*, **1985**, 26, 6113.
